# Supplementary material for: Chiral phosphine-catalyzed asymmetric allylic alkylation of 3-substituted benzofuran-2(3H)-ones or oxindoles with Morita–Baylis–Hillman carbonates
Source: Royal Society of Chemistry journal article supplement (doi:10.1039/c2ob25694k), 2012-01-01
Supplement: c2ob25694k.pdf [file c2ob25694k.pdf]

## Supporting information

### Chiral Phosphine-Catalyzed Asymmetric Allylic Alkylation of 3-Substituted Benzofuran-2(3H)-ones or Oxindoles with Morita-Baylis-Hillman Carbonates

De Wang,<sup>a</sup> Yuan-Liang Yang,<sup>a</sup> Jia-Jun Jiang,<sup>a</sup> and Min Shi<sup>a,b\*</sup>

<sup>a</sup>Key Laboratory for Advanced Materials, School of Chemistry & Molecular Engineering, East China University of Science and Technology, 130 Mei Long Road, Shanghai 200237, China.

<sup>b</sup>State Key Laboratory of Organometallic Chemistry, Shanghai Institute of Organic Chemistry, Chinese Academy of Sciences, 354 Fenglin Lu, Shanghai 200032 China.  
Mshi@mail.sioc.ac.cn

#### Contents:

|                                                                                         |     |
|-----------------------------------------------------------------------------------------|-----|
| 1. General methods                                                                      | S2  |
| 2. General procedure for the synthesis of <b>3</b>                                      | S3  |
| 3. General procedure for the synthesis of <b>5</b>                                      | S3  |
| 4. Characterization and spectra charts containing HPLC traces for products <b>3a-3k</b> | S4  |
| 5. Characterization and spectra charts containing HPLC traces for products <b>5a-5k</b> | S34 |
| 6. A plausible reaction mechanism                                                       | S67 |
| 7. References                                                                           | S68 |

**1. General Methods:**  $^1\text{H}$  and  $^{13}\text{C}$  NMR spectra were recorded at 400 and 100 MHz or 300 and 75 MHz by VARIAN, respectively. Low- and high-resolution mass spectra were recorded by EI, ESI or MALDI method. The used organic solvents were dried by standard methods if it was necessary. Optical rotations were determined at 589 nm (sodium D line) by using a Perkin-Elmer-341 MC digital polarimeter;  $[\alpha]_{\text{D}}$ -values are given in unit of  $10 \text{ deg}^{-1} \text{ cm}^2 \text{ g}^{-1}$ . Chiral HPLC was performed on a SHIMADZU SPD-10A *vp* series with chiral columns (Chiralpak AD-H, OD-H and IC-H columns 4.6 x 250 mm, (Daicel Chemical Ind., Ltd.)). Commercially obtained reagents were used without further purification. All these reactions were monitored by TLC with silica-gel-coated plates. Flash column chromatography was carried out by using silica gel at increased pressure.

Chiral phosphine catalysts **LB1-LB5** were synthesized according to our previous works.<sup>1</sup> All MBH carbonates **2a-2h**,<sup>2</sup> 3-substituted benzofuran-2(3H)-ones **1a-1d**<sup>3</sup> and 3-substituted oxindoles **4a-4e**<sup>4</sup> were prepared according to the previously reported procedures.

## 2. General procedure for the synthesis of **3** (using **3a** as an example)

To a mixture of **1a** (0.10 mmol, 21.0 mg), **2a** (0.20 mmol, 58.0 mg) and **LB1** (10.0 mg, 0.02 mmol) was added 1.0 mL of toluene at 0 °C. The reaction solution was monitored by TLC. After the reaction complete, the solution was concentrated under reduced pressure and the residue was further purified by silica gel column chromatography (EtOAc/PE = 1/10) to give the target product **3a**.

## 3. General procedure for the synthesis of **5** (using **5a** as an example)

To a mixture of **4a** (0.10 mmol, 31.0 mg), **2e** (0.20 mmol, 67.0 mg) and **LB1** (10.0 mg, 0.02 mmol) was added 1.0 mL of toluene at roomtemperature. The reaction solution was monitored by TLC. After the reaction complete, the solution was concentrated under reduced pressure and the residue was further purified by silica gel column chromatography (EtOAc/PE = 1/10) to give the target product **5a**.

#### 4. Characterization and spectra charts containing HPLC traces for products 3a-q.

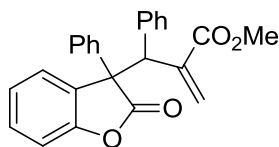

##### Methyl 2-((2-oxo-3-phenyl-2,3-dihydrobenzofuran-3-yl)(phenyl)methyl)acrylate **3a**

A white solid, this is a known compound,<sup>5</sup> 95% yield, 36 mg (*syn:anti* = 67:33);  $[\alpha]_D^{20} = -160.5$  (c 0.5, CHCl<sub>3</sub>) for 94% ee (*syn*) and 91% ee (*anti*); Enantiomeric excess was determined by HPLC with a Chiralcel IC-H column, Hexane/*i*PrOH = 95/5, 0.5 mL/min, 230 nm, for *syn* product  $t_{major} = 27.323$  min,  $t_{minor} = 35.282$  min; for *anti* product  $t_{major} = 33.532$  min,  $t_{minor} = 25.773$  min; <sup>1</sup>H NMR (400 MHz, CDCl<sub>3</sub>, TMS):  $\delta$  3.43 (s, 0.99H, CH<sub>3</sub>), 3.65 (s, 2.01H, CH<sub>3</sub>), 5.38 (s, 0.67H, =CH<sub>2</sub>), 5.39 (s, 0.33H, =CH<sub>2</sub>), 5.57 (d, *J* = 1.2 Hz, 0.33H, =CH<sub>2</sub>), 5.63 (s, 0.67H, =CH<sub>2</sub>), 6.27 (s, 0.33H, CH), 6.41 (s, 0.67H, CH), 6.79-6.82 (m, 1H, Ar), 6.90-7.03 (m, 2H, Ar), 7.07-7.19 (m, 4H, Ar), 7.26-7.39 (m, 5H, Ar), 7.47-7.65 (m, 2H, Ar); MS (ESI) *m/z* 407.4 (M+Na<sup>+</sup>, 100). HRMS (MALDI) Calcd. for C<sub>25</sub>H<sub>20</sub>O<sub>4</sub>Na requires (M+Na<sup>+</sup>) 407.1270, Found: 407.1254.

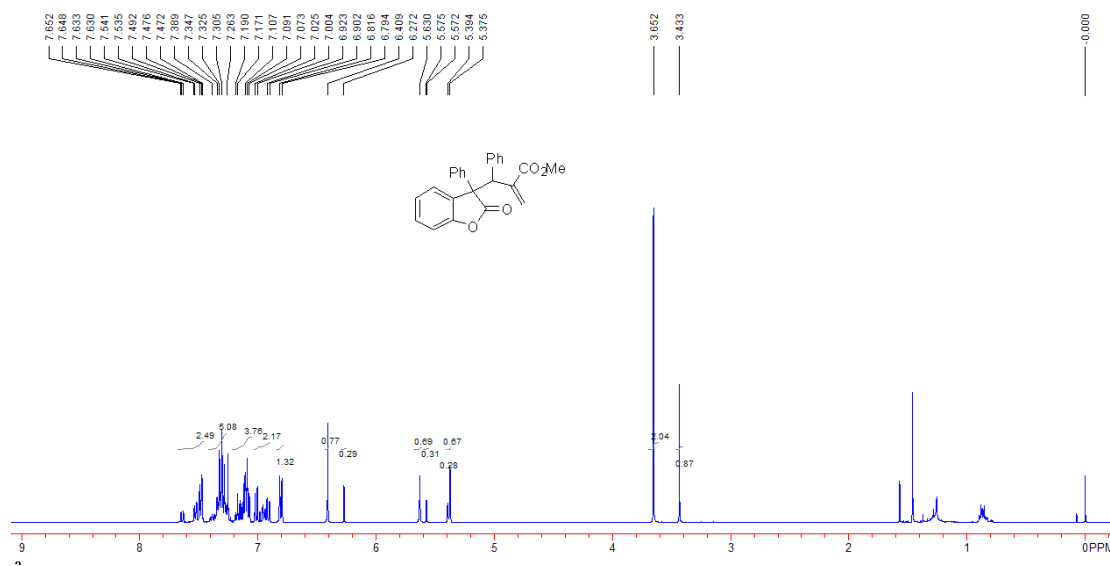

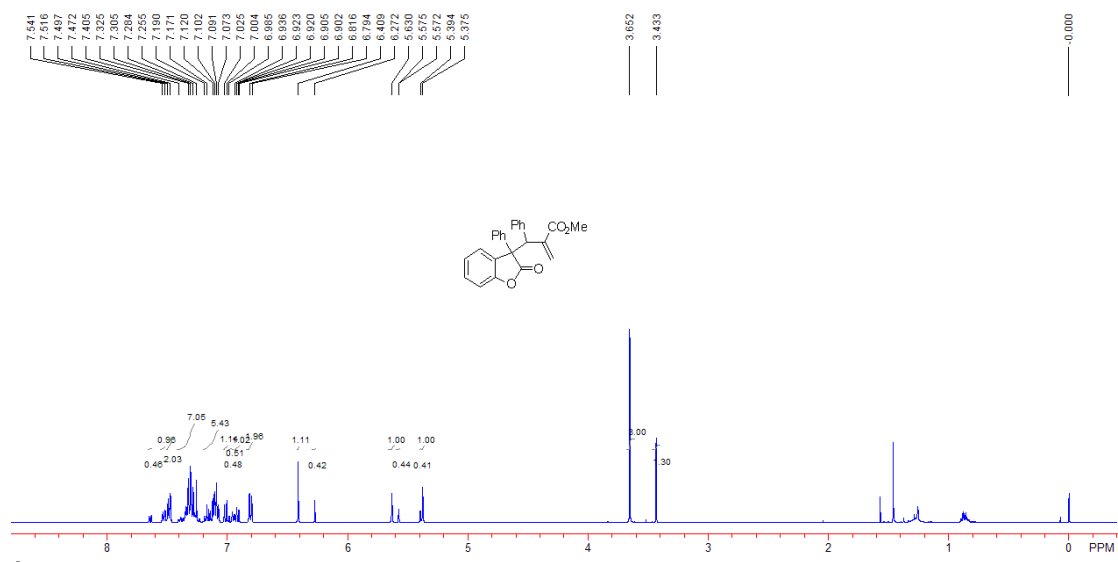

N2000 数据工作站 1

实验时间: 2011-06-01, 21:54:56  
谱图文件: D:\HPLC\SIOC液相\MRH AAA\WD-2-84-RACE-re.org  
实验者:  
报告时间: 2012-01-05, 19:41:20  
积分方法: 面积归一法

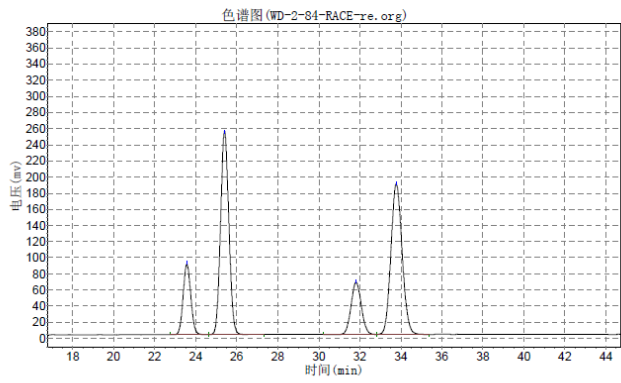

| 分析结果表 |    |        |            |              |          |
|-------|----|--------|------------|--------------|----------|
| 峰号    | 峰名 | 保留时间   | 峰高         | 峰面积          | 含量       |
| 1     |    | 23.565 | 86588.977  | 2269396.750  | 12.1286  |
| 2     |    | 25.432 | 251424.922 | 7079045.000  | 37.8334  |
| 3     |    | 31.832 | 64540.422  | 2256043.500  | 12.0572  |
| 4     |    | 33.798 | 186120.984 | 7106616.000  | 37.9807  |
| 总计    |    |        | 588675.305 | 18711101.250 | 100.0000 |

Chemical structure: CCOC(=O)C(=C)C1C(=O)Oc2ccccc12  
IC-H, 0.5 ml/min, Hexane/iPrOH = 95/5, 230nm

实验时间: 2011-07-06, 10:59:17  
谱图文件: D:\HPLC\SI0C液相\MBH AAA\wd-4-51-光学0度.org

实验者:  
报告时间: 2012-01-05, 19:56:48  
积分方法: 面积归一法

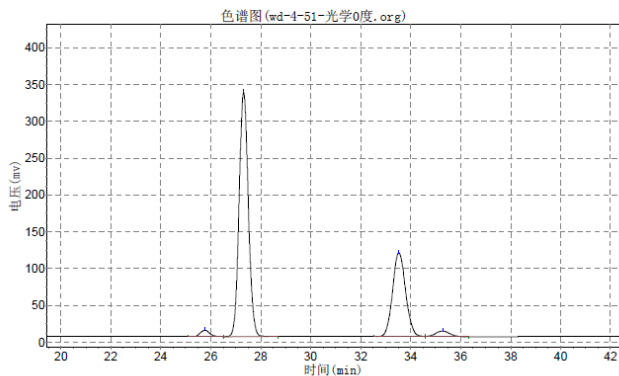

| 分析结果表 |    |        |            |              |          |
|-------|----|--------|------------|--------------|----------|
| 峰号    | 峰名 | 保留时间   | 峰高         | 峰面积          | 含量       |
| 1     |    | 25.773 | 8645.547   | 224427.297   | 1.7068   |
| 2     |    | 27.323 | 331225.688 | 8501483.000  | 64.6545  |
| 3     |    | 33.532 | 113710.508 | 4125101.250  | 31.3717  |
| 4     |    | 35.282 | 7686.279   | 298086.094   | 2.2670   |
| 总计    |    |        | 461268.021 | 13149097.641 | 100.0000 |

| 峰参数表 |        |       |            |       |       |        |            |
|------|--------|-------|------------|-------|-------|--------|------------|
| 峰宽   | 斜率     | 漂移    | 最小面积       | 时间变参  | 锁定时间  | 停止时间   | 样品重量       |
| 5    | 70.000 | 0.000 | 100000.000 | 0.000 | 0.000 | 49.163 | 10000.0000 |

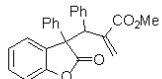

IC-H, 0.5 mL/min, Hexane/iPrOH = 95/5, 230nm

Enantiomeric excess was determined by HPLC with a Chiralcel IC-H column, Hexane/*i*PrOH = 95/5, 0.5 mL/min, 230 nm, for *syn* product  $t_{major} = 27.323$  min,  $t_{minor} = 35.282$  min; for *anti* product  $t_{major} = 33.532$  min,  $t_{minor} = 25.773$  min;

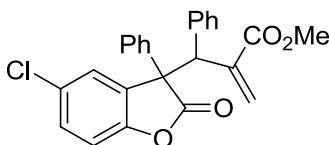

Methyl 2-((5-chloro-2-oxo-3-phenyl-2,3-dihydrobenzofuran-3-yl)(phenyl)methyl)acrylate **3b**  
A white solid, 93% yield, 38 mg, m.p. 105-108 °C, (*syn:anti* = 56:44);  $[\alpha]_D^{20} = -148.1$  (c 1.1, CHCl<sub>3</sub>) for 92% ee (*syn*) and 91% ee (*anti*); Enantiomeric excess was determined by HPLC with a Chiralcel AD-H column, Hexane/*i*PrOH = 95/5, 0.5 mL/min, 254 nm, for *syn* product  $t_{major} = 13.377$  min,  $t_{minor} = 18.227$  min; for *anti* product  $t_{major} = 14.227$  min,  $t_{minor} = 16.927$  min. <sup>1</sup>H NMR (400 MHz, CDCl<sub>3</sub>, TMS): δ 3.46 (s, 1.32H, CH<sub>3</sub>), 3.65 (s, 1.68H, CH<sub>3</sub>), 5.35 (s, 0.56H, =CH<sub>2</sub>), 5.39 (s, 0.44H, =CH<sub>2</sub>), 5.55 (d, *J* = 1.2 Hz, 0.44H, =CH<sub>2</sub>), 5.70 (s, 0.56H, =CH<sub>2</sub>), 6.30 (s, 0.44H, CH), 6.43 (s, 0.56H, CH), 6.82-6.89 (m, 2H, Ar), 6.92-6.98 (m, 2H, Ar), 7.10-7.21 (m, 3H, Ar), 7.25-7.37 (m, 4H, Ar), 7.43-7.61 (m, 2H, Ar); <sup>13</sup>C NMR (CDCl<sub>3</sub>, 100 MHz): δ 52.07, 52.31, 53.05, 53.58, 59.84, 60.15, 111.96, 112.16, 126.67, 127.22,

127.36, 127.53, 127.86, 127.87, 128.17, 128.20, 128.25, 128.28, 128.40, 128.69, 128.90, 129.15, 129.38, 129.55, 129.56, 129.63, 129.71, 130.70, 134.63, 135.85, 136.63, 137.19, 138.37, 139.23, 150.98, 151.51, 166.74, 167.49, 175.75, 176.04; IR (neat)  $\nu$  2949, 1805, 1718, 1466, 1262, 1132, 1065, 702  $\text{cm}^{-1}$ ; MS (ESI)  $m/z$  441.4 ( $\text{M}+\text{Na}^+$ , 100). HRMS (ESI) Calcd. for  $\text{C}_{25}\text{H}_{19}\text{ClO}_4\text{Na}$  requires ( $\text{M}+\text{Na}^+$ ) 441.0868, Found: 441.0864.

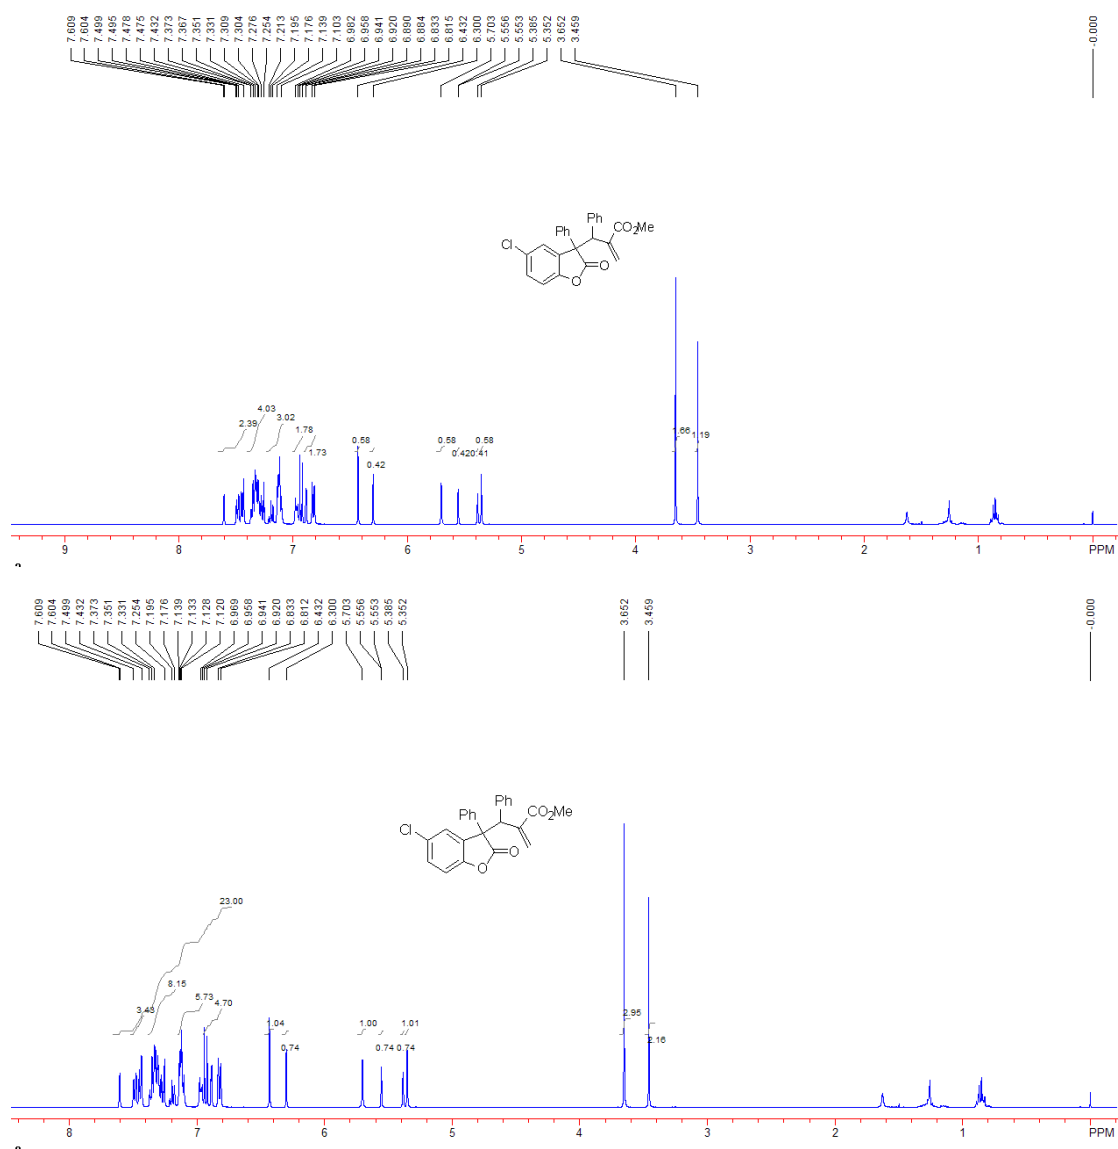

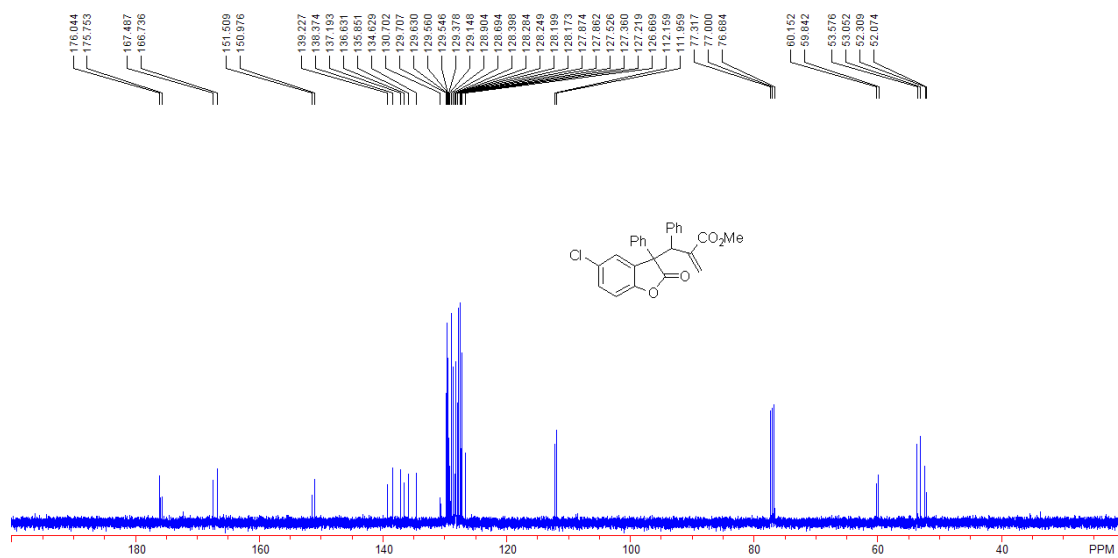

HPLC REPORT

Sample Name:wd-3-58-rac ad250 95 0.5.che Date:2011-08-23  
Time:09:41 Method:  
column: the mobile phase:  
Velocity: the detection wavelength:

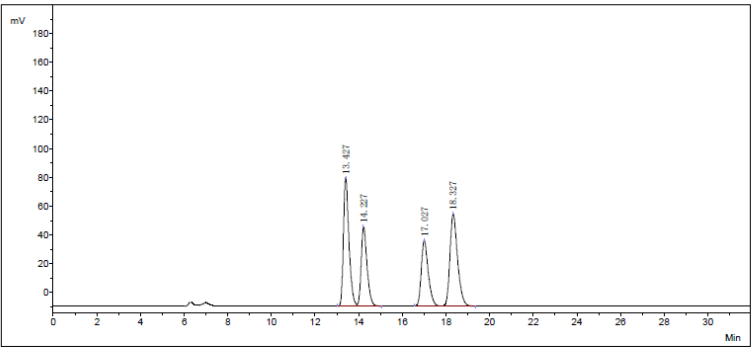

| No.   | PeakNo | R. Time | PeakHeight | PeakArea  | PerCent  |
|-------|--------|---------|------------|-----------|----------|
| 1     | 1      | 13.427  | 89100.1    | 1578296.0 | 30.4137  |
| 2     | 2      | 14.227  | 54979.2    | 1025046.9 | 19.7526  |
| 3     | 3      | 17.027  | 45598.9    | 1018930.0 | 19.6347  |
| 4     | 4      | 18.327  | 64006.5    | 1567151.8 | 30.1990  |
| Total |        |         | 253684.7   | 5189424.7 | 100.0000 |

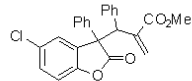

AD-H, 0.5 ml/min, Hexane/iPrOH = 95/5, 254nm

## HPLC REPORT

Sample Name:wd-3-58. che

Date:2011-08-23

Time:10:15

Method:

column:

the mobile phase:

Velocity:

the detection wavelength:

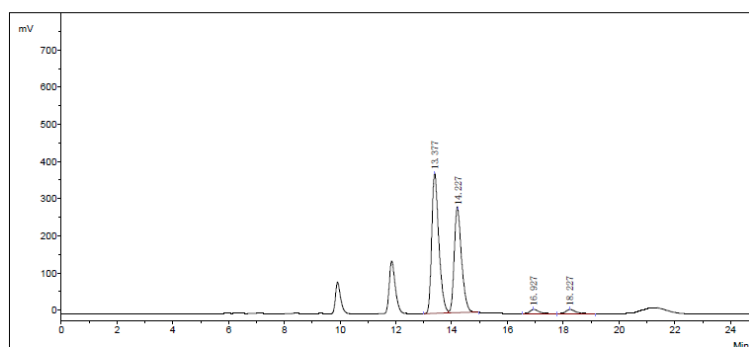

| No.   | PeakNo | R. Time | PeakHeight | PeakArea   | PerCent  |
|-------|--------|---------|------------|------------|----------|
| 1     | 1      | 13.377  | 374836.0   | 6632590.6  | 53.7063  |
| 2     | 2      | 14.227  | 277739.9   | 5195300.8  | 42.0681  |
| 3     | 3      | 16.927  | 11455.0    | 251025.2   | 2.0326   |
| 4     | 4      | 18.227  | 11233.7    | 270836.6   | 2.1931   |
| Total |        |         | 675264.5   | 12349753.2 | 100.0000 |

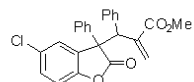

AD-H, 0.5 ml/min, Hexane/iPrOH = 95/5, 254nm

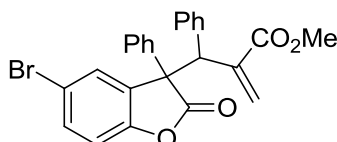

Methyl 2-((5-bromo-2-oxo-3-phenyl-2,3-dihydrobenzofuran-3-yl)(phenyl)methyl)acrylate **3c**

A white solid, 90% yield, 41 mg, m.p. 94-95 °C, (*syn:anti* = 71:29);  $[\alpha]_D^{20} = -172.7$  (c 0.6, CHCl<sub>3</sub>) for 97% ee (*syn*) and 92% ee (*anti*); Enantiomeric excess was determined by HPLC with a Chiralcel IC-H column, Hexane/*i*PrOH = 98/2, 0.7 mL/min, 230 nm, for *syn* product  $t_{major} = 19.027$  min,  $t_{minor} = 23.527$  min; for *anti* product  $t_{major} = 21.727$  min,  $t_{minor} = 16.977$  min. <sup>1</sup>H NMR (400 MHz, CDCl<sub>3</sub>, TMS): δ 3.47 (s, 0.87H, CH<sub>3</sub>), 3.66 (s, 2.13H, CH<sub>3</sub>), 5.35 (s, 0.71H, =CH<sub>2</sub>), 5.38 (s, 0.29H, =CH<sub>2</sub>), 5.55 (s, 0.29H, =CH<sub>2</sub>), 5.70 (s, 0.71H, =CH<sub>2</sub>), 6.30 (s, 0.29H, CH), 6.43 (s, 0.71H, CH), 6.81-7.01 (m, 4H, Ar), 7.13-7.22 (m, 3H, Ar), 7.31-7.36 (m, 3H, Ar), 7.42-7.74 (m, 3H, Ar); <sup>13</sup>C NMR (CDCl<sub>3</sub>, 100 MHz): δ □52.10, 52.32, 53.11, 53.58, 59.81, 60.12, 112.44, 112.64, 116.43, 125.28, 127.24, 127.54, 127.88, 128.21, 128.22, 128.30, 128.72, 128.93, 129.01, 129.54, 129.59, 129.74, 130.10, 130.18, 132.29, 132.56, 134.65, 135.89, 137.22, 138.39, 139.29, 151.50, 152.02, 166.77, 167.50, 175.62, 175.92; IR (neat) ν

2916, 1806, 1719, 1466, 1234, 1135, 1065, 701  $\text{cm}^{-1}$ ; MS (ESI)  $m/z$  485.3 ( $\text{M}+\text{Na}^+$ , 100).

HRMS (ESI) Calcd. for  $\text{C}_{25}\text{H}_{19}\text{BrO}_4\text{Na}$  requires ( $\text{M}+\text{Na}^+$ ) 485.0366, Found: 485.0359.

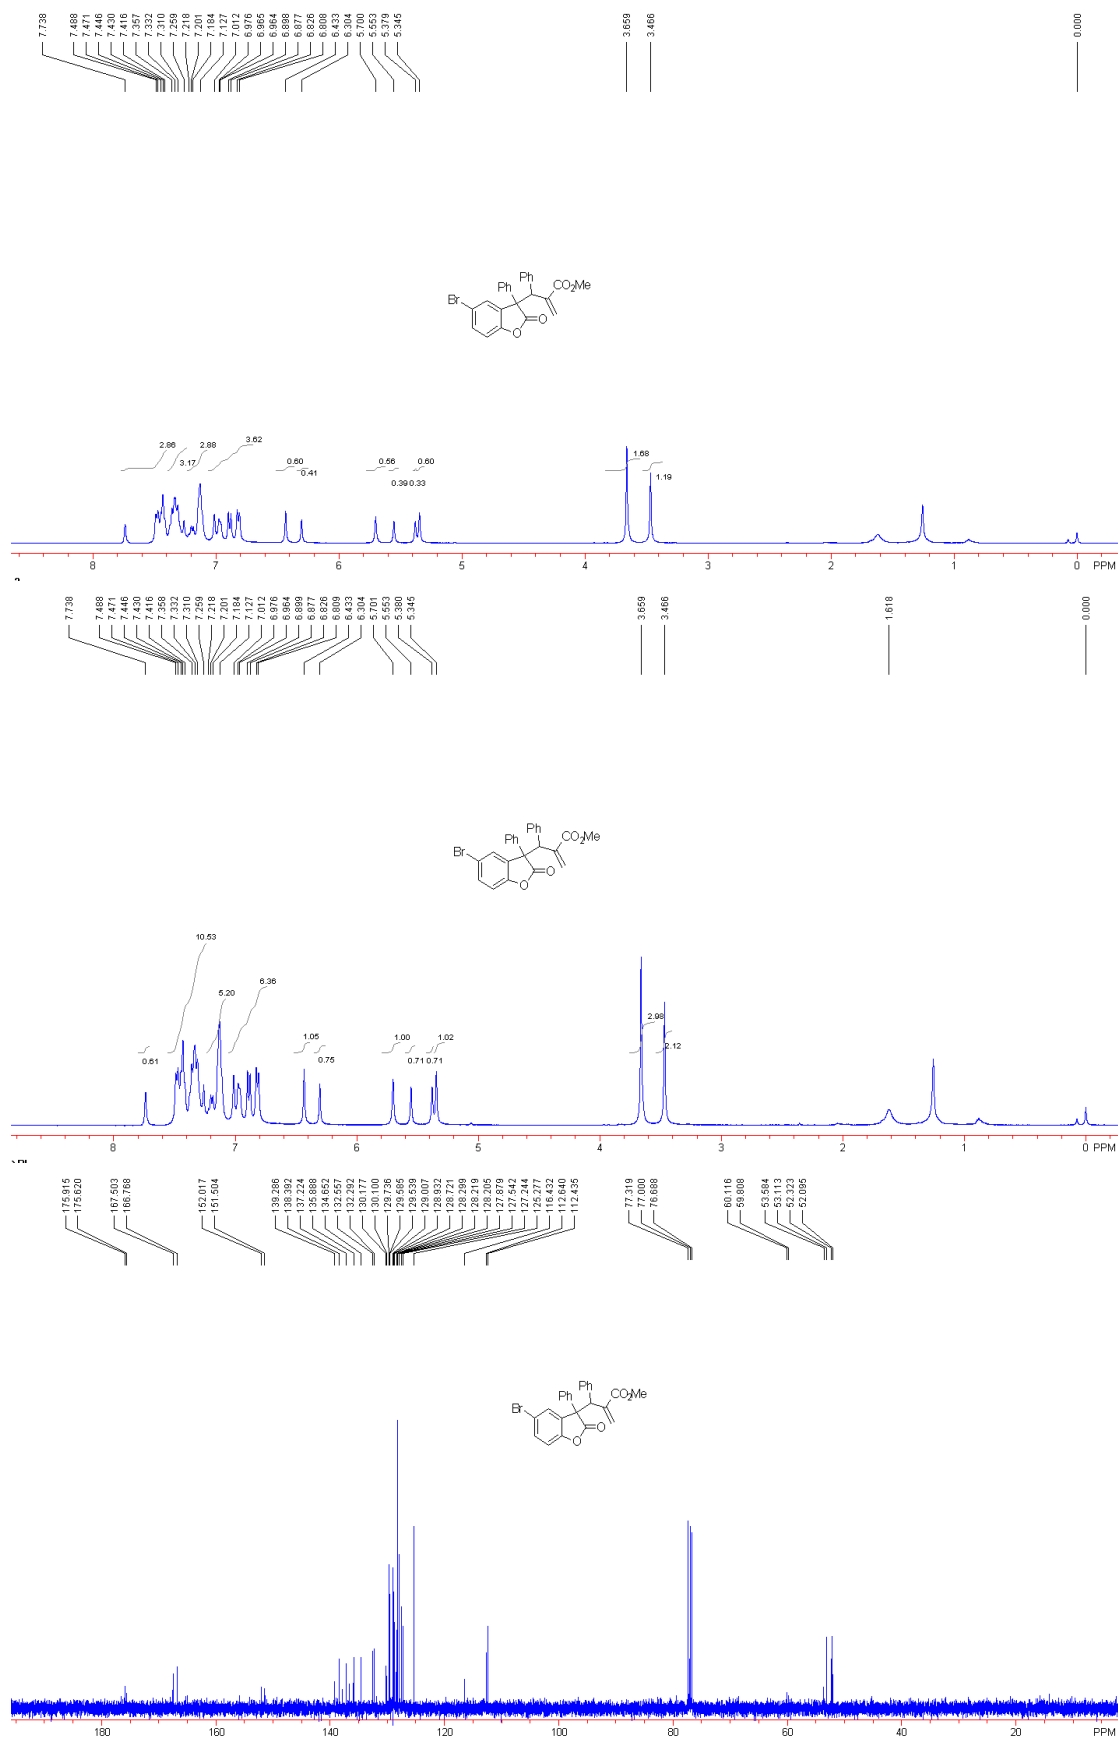

HPLC REPORT

Sample Name:wd-4-48-rac ic 98.che  
Time:14:28  
column:  
Velocity:  
Date:2011-08-25  
Method:  
the mobile phase:  
the detection wavelength:

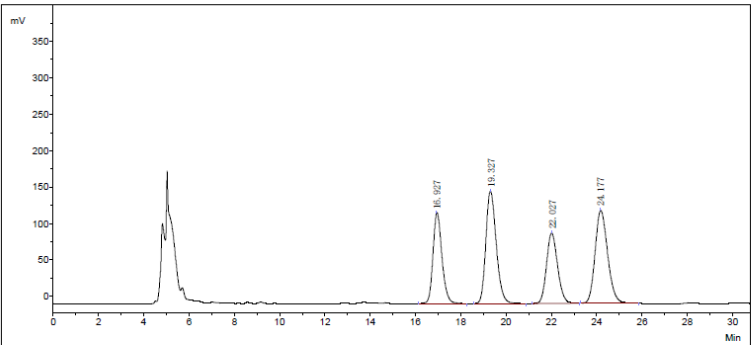

| No.   | PeakNo | R. Time | PeakHeight | PeakArea   | PerCent  |
|-------|--------|---------|------------|------------|----------|
| 1     | 1      | 16.927  | 123881.6   | 3418705.6  | 20.7303  |
| 2     | 2      | 19.327  | 153823.6   | 4916406.4  | 29.8120  |
| 3     | 3      | 22.027  | 96401.4    | 3267880.7  | 19.8157  |
| 4     | 4      | 24.177  | 127228.1   | 4888389.3  | 29.6421  |
| Total |        |         | 501334.8   | 16491382.0 | 100.0000 |

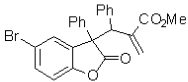

IC-H, 0.7 ml/min, Hexane/iPrOH = 98/2, 230nm

HPLC REPORT

Sample Name:wd-4-48 ic 98.che  
Time:15:01  
column:  
Velocity:  
Date:2011-08-25  
Method:  
the mobile phase:  
the detection wavelength:

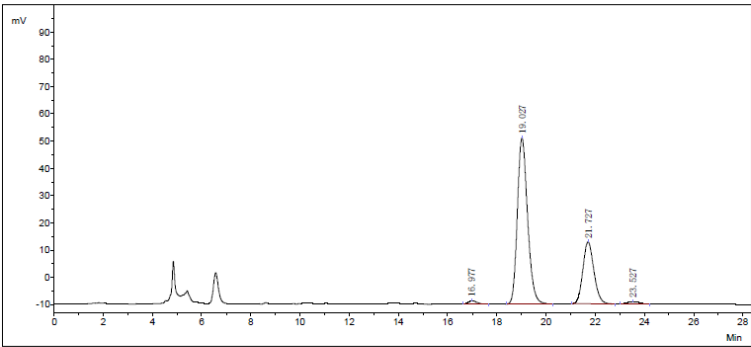

| No.   | PeakNo | R. Time | PeakHeight | PeakArea  | PerCent  |
|-------|--------|---------|------------|-----------|----------|
| 1     | 1      | 16.977  | 1182.3     | 29229.5   | 1.1621   |
| 2     | 2      | 19.027  | 60933.8    | 1752194.2 | 69.6627  |
| 3     | 3      | 21.727  | 22674.7    | 707999.2  | 28.1482  |
| 4     | 4      | 23.527  | 795.5      | 25832.0   | 1.0270   |
| Total |        |         | 85586.3    | 2515254.9 | 100.0000 |

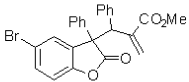

IC-H, 0.7 ml/min, Hexane/iPrOH = 98/2, 230nm

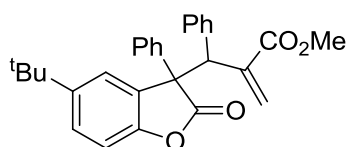

Methyl 2-((5-(tert-butyl)-2-oxo-3-phenyl-2,3-dihydrobenzofuran-3-yl)(phenyl)methyl)acrylate

### 3d

A colorless oil, 91% yield, 40 mg (*syn:anti* = 63:37);  $[\alpha]_{\text{D}}^{20} = -134.6$  (c 2.0,  $\text{CHCl}_3$ ) for 90% ee (*syn*) and 88% ee (*anti*); Enantiomeric excess was determined by HPLC with a Chiralcel IC-H column, Hexane/*i*PrOH = 93/7, 0.5 mL/min, 230 nm, for *syn* product  $t_{\text{major}} = 19.627$  min,  $t_{\text{minor}} = 26.327$  min; for *anti* product  $t_{\text{major}} = 18.077$  min,  $t_{\text{minor}} = 15.177$  min.  $^1\text{H}$  NMR (400 MHz,  $\text{CDCl}_3$ , TMS):  $\delta$  1.25 (s, 5.67H,  $^t\text{Bu}$ ), 1.38 (s, 3.33H,  $^t\text{Bu}$ ), 3.44 (s, 1.11H,  $\text{CH}_3$ ), 3.66 (s, 1.89H,  $\text{CH}_3$ ), 5.38 (s, 0.37H,  $=\text{CH}_2$ ), 5.40 (s, 0.63H,  $=\text{CH}_2$ ), 5.41 (s, 0.67H,  $=\text{CH}_2$ ), 5.58 (d,  $J = 1.2$  Hz, 0.33H,  $=\text{CH}_2$ ), 6.29 (s, 0.33H, CH), 6.39 (s, 0.67H, CH), 6.76-6.78 (m, 2H, Ar), 6.89-6.98 (m, 2H, Ar), 7.06-7.20 (m, 3H, Ar), 7.25-7.36 (m, 4H, Ar), 7.49-7.63 (m, 2H, Ar);  $^{13}\text{C}$  NMR ( $\text{CDCl}_3$ , 100 MHz):  $\delta$  31.39, 31.52, 34.64, 34.71, 51.97, 52.26, 53.00, 53.39, 59.45, 59.67, 110.06, 110.09, 124.59, 125.98, 126.04, 127.29, 127.30, 127.58, 127.64, 127.66, 127.80, 127.90, 127.92, 128.01, 128.44, 128.60, 128.99, 129.61, 129.88, 135.12, 136.69, 137.77, 139.05, 139.78, 146.77, 146.84, 150.68, 150.86, 166.79, 167.71, 176.87, 177.17; IR (neat)  $\nu$  2957, 1801, 1720, 1488, 1264, 1145, 1065, 704, 702  $\text{cm}^{-1}$ ; MS (ESI)  $m/z$  463.5 ( $\text{M}+\text{Na}^+$ , 100). HRMS (ESI) Calcd. for  $\text{C}_{29}\text{H}_{28}\text{O}_4\text{Na}$  requires ( $\text{M}+\text{Na}^+$ ) 463.1889, Found: 463.1880.

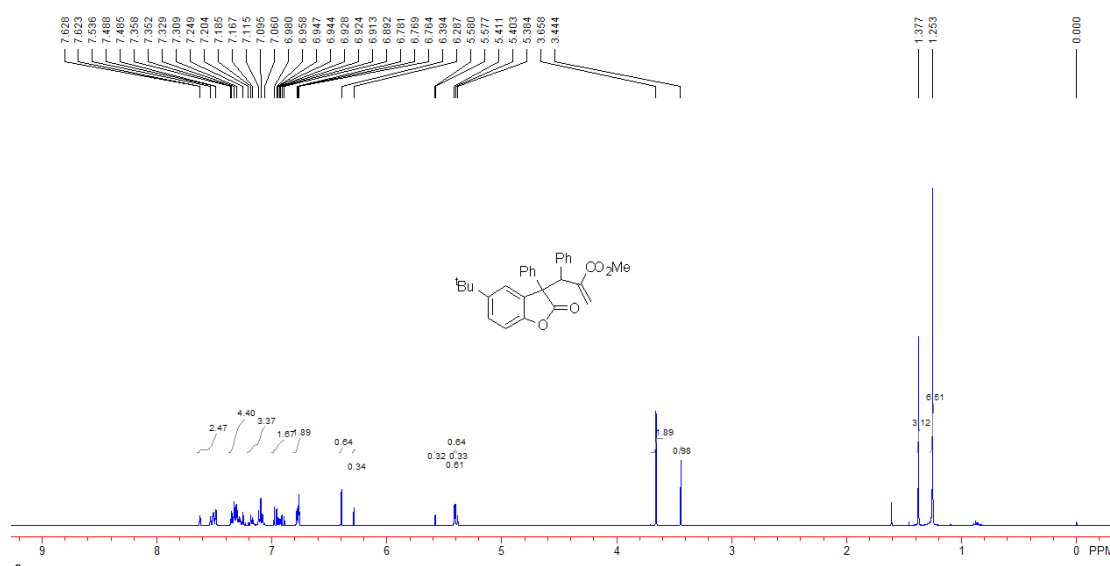

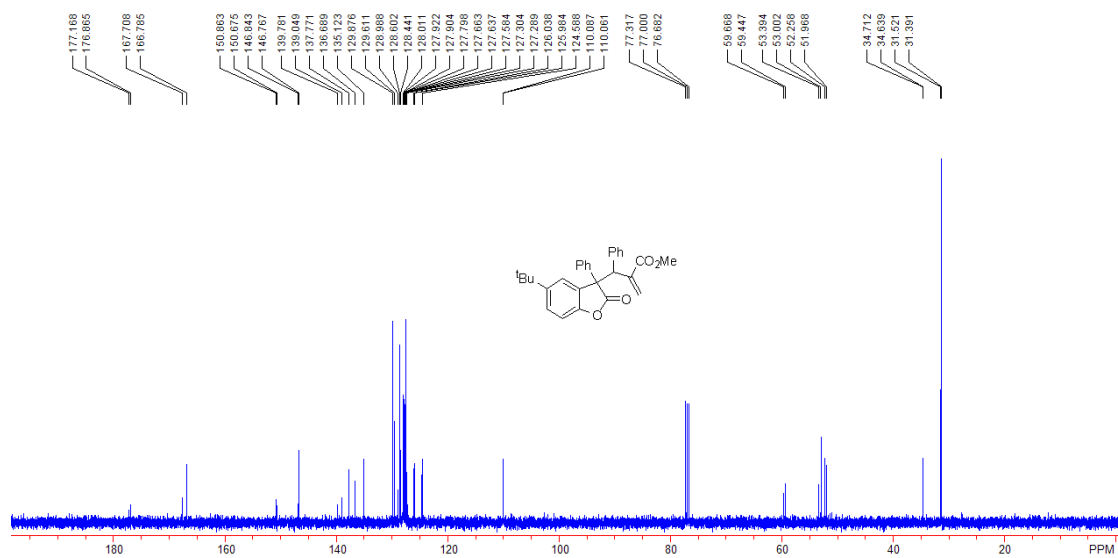

HPLC REPORT

Sample Name:wd-4-49-rac ic 93 0.5.che Date:2011-08-25  
Time:08:46 Method:  
column: the mobile phase:  
Velocity: the detection wavelength:

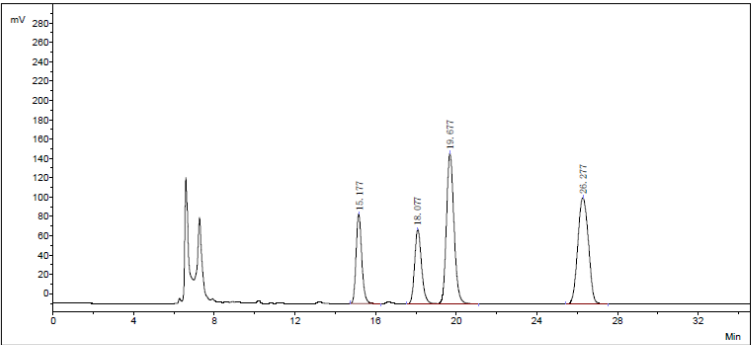

| No.   | PeakNo | R. Time | PeakHeight | PeakArea   | PerCent  |
|-------|--------|---------|------------|------------|----------|
| 1     | 1      | 15.177  | 92028.8    | 1809233.1  | 15.4578  |
| 2     | 2      | 18.077  | 76674.5    | 1830128.1  | 15.6363  |
| 3     | 3      | 19.677  | 155688.8   | 4063108.5  | 34.7145  |
| 4     | 4      | 26.277  | 110060.1   | 4001874.8  | 34.1914  |
| Total |        |         | 434452.1   | 11704344.5 | 100.0000 |

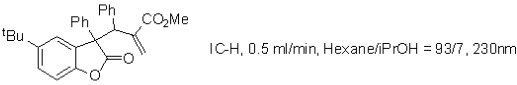

## HPLC REPORT

Sample Name:wd-4-49.che  
Time:09:22  
column:  
Velocity:

Date:2011-08-25  
Method:  
the mobile phase:  
the detection wavelength:

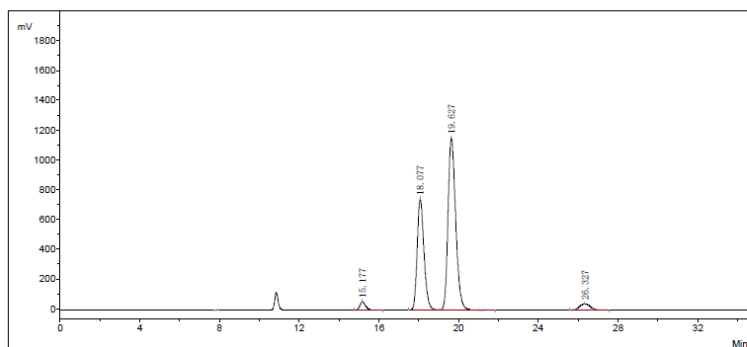

| No.   | PeakNo | R. Time | PeakHeight | PeakArea   | PerCent  |
|-------|--------|---------|------------|------------|----------|
| 1     | 1      | 15.177  | 55901.6    | 1077948.5  | 2.1038   |
| 2     | 2      | 18.077  | 745865.7   | 17662768.1 | 34.4717  |
| 3     | 3      | 19.627  | 1154194.5  | 30911146.0 | 60.3280  |
| 4     | 4      | 26.327  | 43733.9    | 1586605.2  | 3.0965   |
| Total |        |         | 1999695.7  | 51238467.8 | 100.0000 |

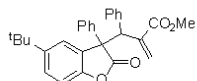

IC-H, 0.5 ml/min, Hexane/*i*PrOH = 93/7, 230nm

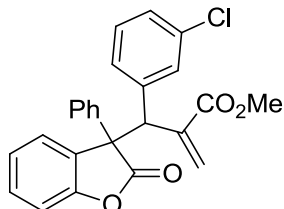

Methyl 2-((3-chlorophenyl)(2-oxo-3-phenyl-2,3-dihydrobenzofuran-3-yl)methyl)acrylate **3e**

A white solid, this is a known compound,<sup>5</sup> 99% yield, 41 mg (*syn:anti* = 56:44);  $[\alpha]_{\text{D}}^{20} = -189.6$  (c 2.2, CHCl<sub>3</sub>) for 94% ee (*syn*) and 90% ee (*anti*); Enantiomeric excess was determined by HPLC with a Chiralcel REGIS-H column, Hexane/*i*PrOH = 100/0.5, 0.5 mL/min, 230 nm, for *syn* product  $t_{\text{major}} = 93.710$  min,  $t_{\text{minor}} = 68.245$  min; for *anti* product  $t_{\text{major}} = 71.377$  min,  $t_{\text{minor}} = 86.127$  min; <sup>1</sup>H NMR (400 MHz, CDCl<sub>3</sub>, TMS):  $\delta$  3.46 (s, 1.32H, CH<sub>3</sub>), 3.67 (s, 1.68H, CH<sub>3</sub>), 5.33 (s, 0.63H, =CH<sub>2</sub>), 5.37 (s, 0.37H, =CH<sub>2</sub>), 5.58 (s, 0.40H, =CH<sub>2</sub>), 5.60 (s, 0.60H, =CH<sub>2</sub>), 6.31 (s, 0.36H, CH), 6.44 (s, 0.64H, CH), 6.67-6.74 (m, 1H, Ar), 6.90 (d, *J* = 6.8 Hz, 1H, Ar), 7.01-7.18 (m, 4H, Ar), 7.27-7.39 (m, 5H, Ar), 7.47-7.51 (m, 2H, Ar).

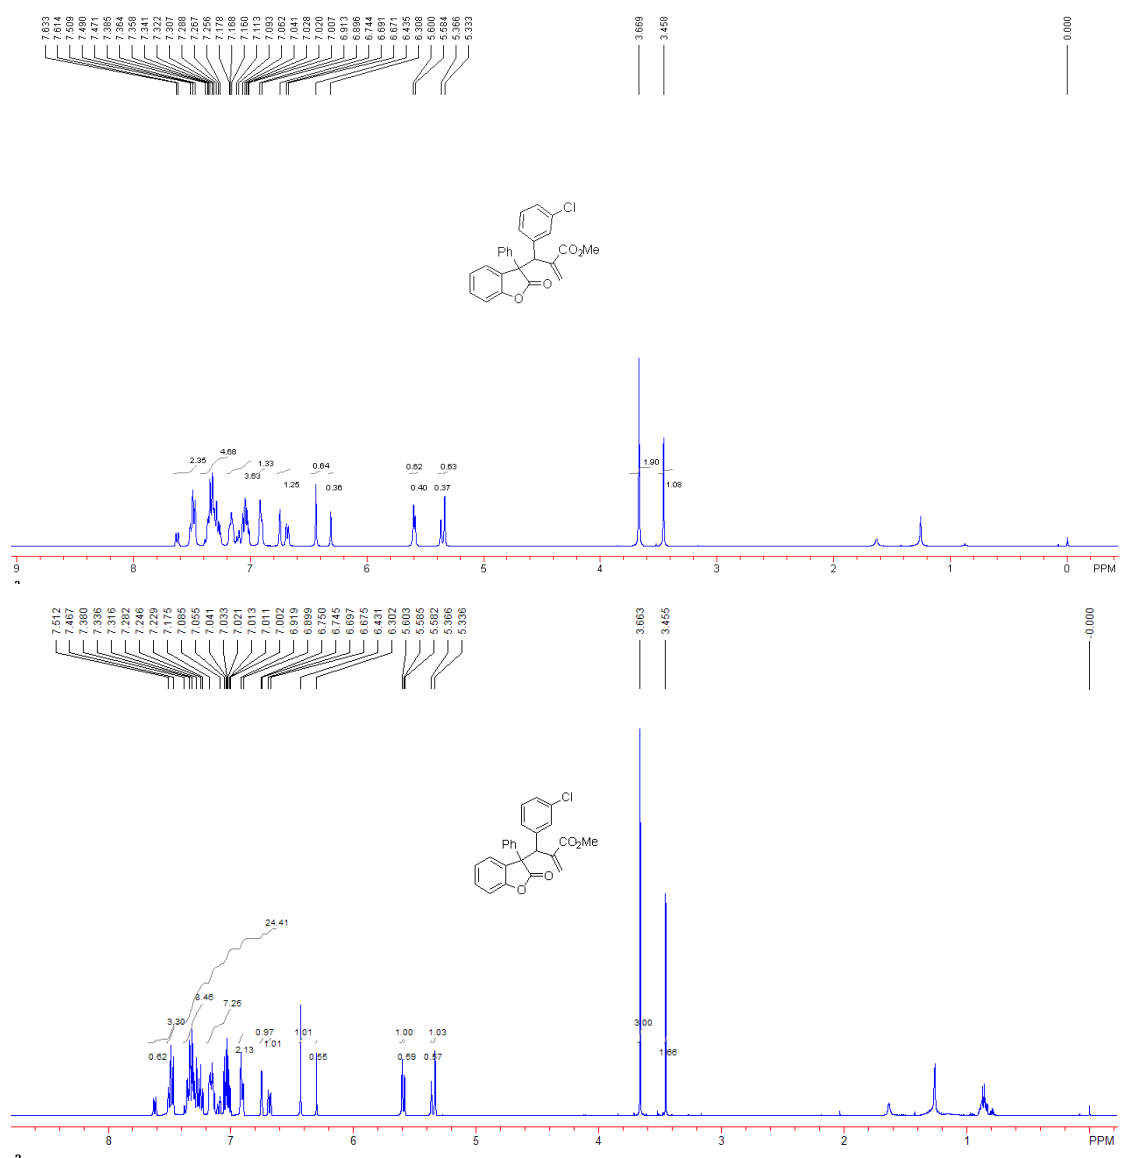

HPLC REPORT

Sample Name:WD-4-84-REGIS-100+0.5-0.5.che      Date:2011-09-07  
Time:12:09      Method:  
Column:      Flow Rate:  
Wave Length:      Mobile Phase:

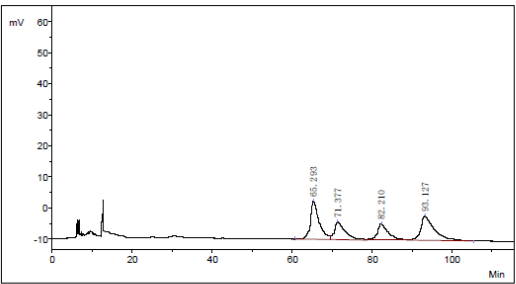

| No.   | PeakNo | ID. Name | R. Time | PeakHeight | PeakArea  | PerCent  |
|-------|--------|----------|---------|------------|-----------|----------|
| 1     | 1      | Unknown  | 65.293  | 12397.5    | 1872218.9 | 32.5371  |
| 2     | 2      | Unknown  | 71.377  | 5610.4     | 1052225.9 | 18.2865  |
| 3     | 3      | Unknown  | 82.210  | 5115.8     | 900482.7  | 17.0397  |
| 4     | 4      | Unknown  | 93.127  | 7825.4     | 1849184.9 | 32.1368  |
| Total |        |          |         | 30949.2    | 5754112.4 | 100.0000 |

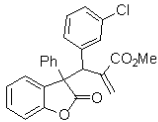

REGIS, 0.5 ml/min, Hexane/iPrOH = 100/0.5, 230nm

HPLC REPORT

Sample Name:WD-4-80.che      Date:2011-09-08  
Time:08:04      Method:  
Column:      Flow Rate:  
Wave Length:      Mobile Phase:

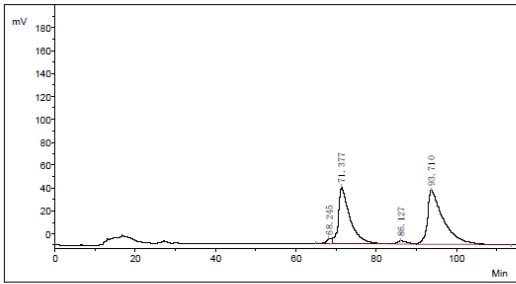

| No.   | PeakNo | ID. Name | R. Time | PeakHeight | PeakArea   | PerCent  |
|-------|--------|----------|---------|------------|------------|----------|
| 1     | 1      | Unknown  | 68.245  | 4141.1     | 376997.5   | 1.6046   |
| 2     | 2      | Unknown  | 71.377  | 49499.3    | 9791626.4  | 41.6757  |
| 3     | 3      | Unknown  | 86.127  | 2778.3     | 506412.8   | 2.1554   |
| 4     | 4      | Unknown  | 93.710  | 46967.7    | 12819777.9 | 54.5643  |
| Total |        |          |         | 103386.4   | 23494814.6 | 100.0000 |

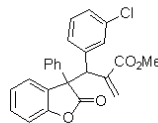

REGIS, 0.5 ml/min, Hexane/iPrOH = 100/0.5, 230nm

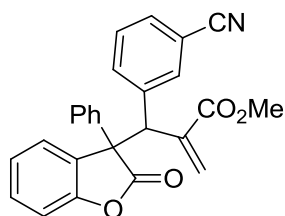

Methyl 2-((3-cyanophenyl)(2-oxo-3-phenyl-2,3-dihydrobenzofuran-3-yl)methyl)acrylate **3f**

A white solid, 84% yield, 34 mg, m.p. 124-126 °C, (*syn:anti* = 56:44);  $[\alpha]_D^{20} = -254.8$  (c 1.8, CHCl<sub>3</sub>) for 90% ee (*syn*) and 88% ee (*anti*); Enantiomeric excess was determined by HPLC with a Chiralcel IC-H column, Hexane/*i*PrOH = 93/7, 0.5 mL/min, 230 nm, for *syn* product  $t_{major} = 55.027$  min,  $t_{minor} = 61.327$  min; for *anti* product  $t_{major} = 45.677$  min,  $t_{minor} = 50.477$  min; <sup>1</sup>H NMR (400 MHz, CDCl<sub>3</sub>, TMS): δ 3.49 (s, 1.32H, CH<sub>3</sub>), 3.67 (s, 1.68H, CH<sub>3</sub>), 5.37 (s, 0.56H, =CH<sub>2</sub>), 5.41 (s, 0.44H, =CH<sub>2</sub>), 5.63 (d, *J* = 1.2 Hz, 0.44H, =CH<sub>2</sub>), 5.71 (s, 0.56H, =CH<sub>2</sub>), 6.35 (s, 0.44H, CH), 6.48 (s, 0.56H, CH), 6.88-7.08 (m, 2H, Ar), 7.13-7.38 (m, 8H, Ar), 7.40-7.63 (m, 3H, Ar); <sup>13</sup>C NMR (CDCl<sub>3</sub>, 100 MHz): δ 52.20, 52.41, 52.62, 53.05, 59.24, 59.30, 111.22, 111.85, 111.96, 118.36, 124.17, 124.24, 126.11, 126.79, 127.22, 127.39, 128.06, 128.16, 128.29, 128.33, 128.58, 128.74, 128.77, 128.80, 128.96, 129.37, 129.82, 129.93, 131.00, 131.33, 133.20, 133.23, 134.13, 134.38, 136.03, 137.05, 137.13, 137.59, 138.32, 138.61, 152.52, 152.77, 166.43, 166.95, 176.06, 176.13; IR (neat) ν 2952, 2230, 1800, 1719, 1462, 1271, 1066, 753, 699 cm<sup>-1</sup>; MS (ESI) *m/z* 432.3 (M+Na<sup>+</sup>, 100). HRMS (ESI) Calcd. for C<sub>26</sub>H<sub>19</sub>NO<sub>4</sub>Na requires (M+Na<sup>+</sup>) 432.1216, Found: 432.1206.

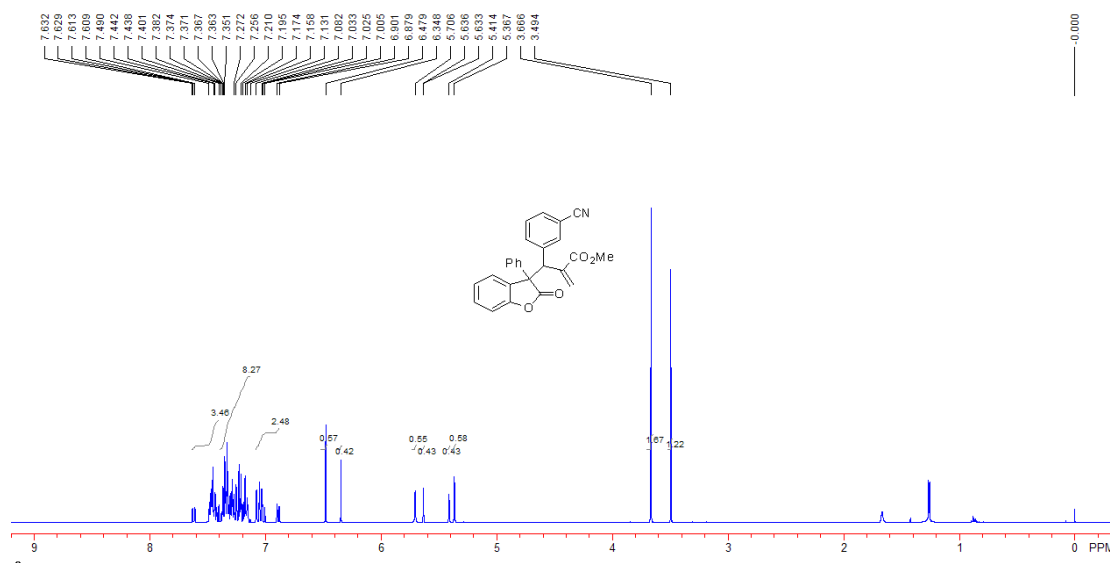

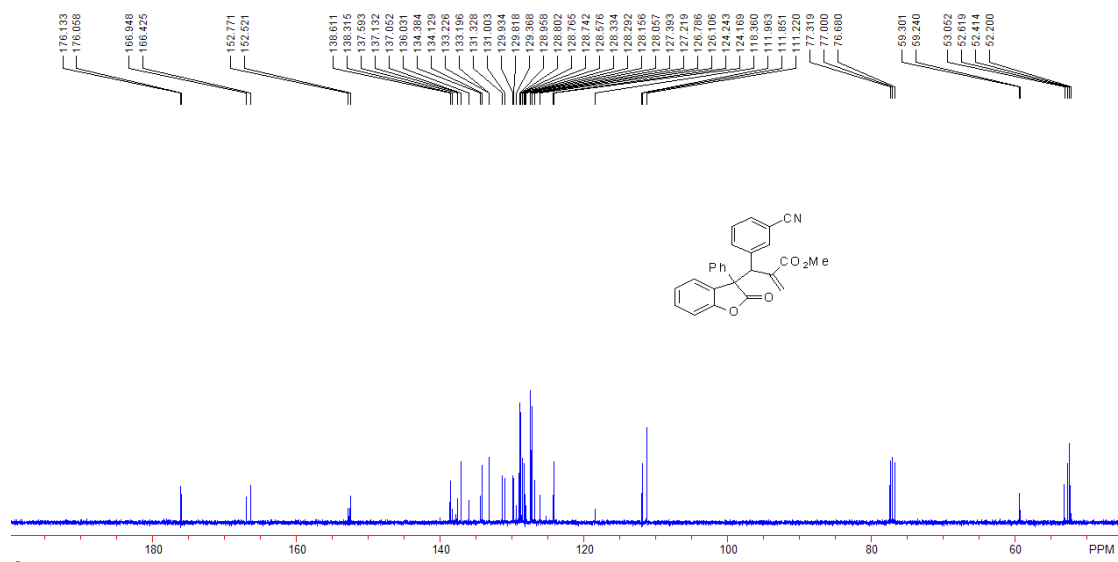

HPLC REPORT

Sample Name:wd-4-87-rac ic 93 0.5.che      Date:2011-08-25  
Time:10:30      Method:  
column:      the mobile phase:  
Velocity:      the detection wavelength:

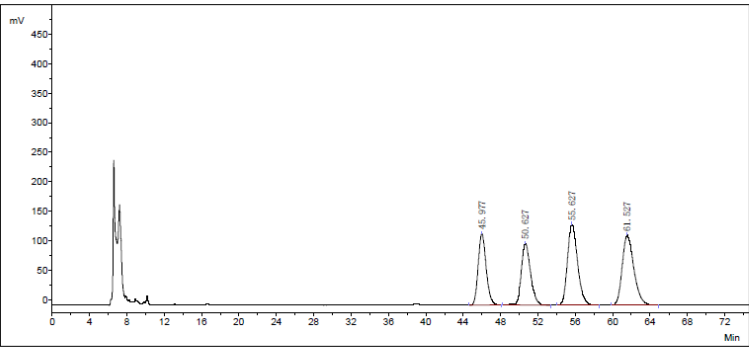

| No.   | PeakNo | R. Time | PeakHeight | PeakArea   | PerCent  |
|-------|--------|---------|------------|------------|----------|
| 1     | 1      | 45.977  | 121196.9   | 7184814.3  | 20.4908  |
| 2     | 2      | 50.627  | 104886.5   | 7200155.6  | 20.5346  |
| 3     | 3      | 55.627  | 137349.5   | 10356109.6 | 29.5352  |
| 4     | 4      | 61.527  | 118658.8   | 10322494.6 | 29.4394  |
| Total |        |         | 482091.6   | 35063574.1 | 100.0000 |

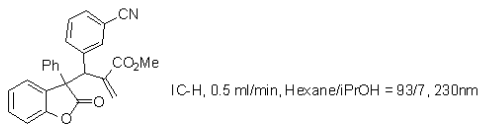

## HPLC REPORT

Sample Name:wd-4-87.che

Date:2011-08-25

Time:11:47

Method:

column:

the mobile phase:

Velocity:

the detection wavelength:

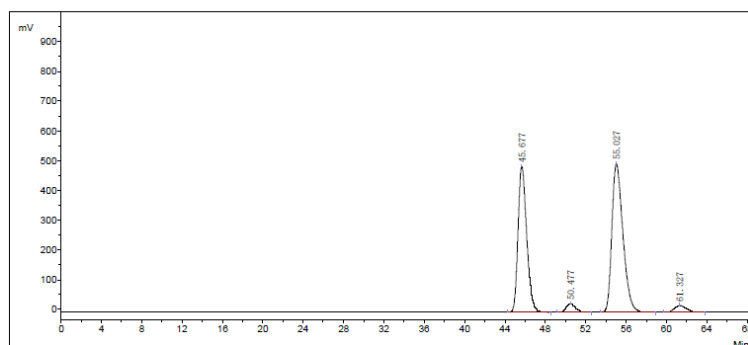

| No.   | PeakNo | R. Time | PeakHeight | PeakArea   | PerCent  |
|-------|--------|---------|------------|------------|----------|
| 1     | 1      | 45.677  | 490629.7   | 29550434.7 | 41.2325  |
| 2     | 2      | 50.477  | 28455.6    | 1880540.9  | 2.6418   |
| 3     | 3      | 55.027  | 498557.1   | 38037851.3 | 53.4368  |
| 4     | 4      | 61.327  | 22560.2    | 1914022.8  | 2.6889   |
| Total |        |         | 1040202.6  | 71182849.7 | 100.0000 |

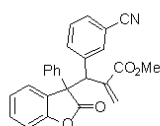

LC-MS, 0.5 ml/min, Hexane/iPrOH = 93/7, 230nm

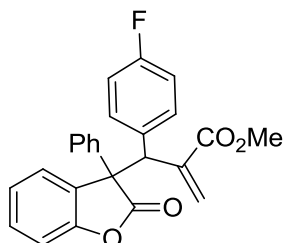

Methyl 2-((4-fluorophenyl)(2-oxo-3-phenyl-2,3-dihydrobenzofuran-3-yl)methyl)acrylate **3g**

A white solid, this is a known compound,<sup>5</sup> 93% yield, 37 mg (*syn:anti* = 64:36);  $[\alpha]_D^{20} = -228.7$  (c 1.85, CHCl<sub>3</sub>) for 92% ee (*syn*) and 89% ee (*anti*); Enantiomeric excess was determined by HPLC with a Chiralcel AD-H column, Hexane/*i*PrOH = 97/3, 0.5 mL/min, 210 nm, for *syn* product  $t_{major} = 17.460$  min,  $t_{minor} = 31.167$  min; for *anti* product  $t_{major} = 26.322$  min,  $t_{minor} = 43.432$  min; <sup>1</sup>H NMR (400 MHz, CDCl<sub>3</sub>, TMS):  $\delta$  3.46 (s, 1.08H, CH<sub>3</sub>), 3.66 (s, 1.92H, CH<sub>3</sub>), 5.34 (s, 0.64H, =CH<sub>2</sub>), 5.38 (s, 0.36H, =CH<sub>2</sub>), 5.57 (d, *J* = 1.2 Hz, 0.36H, =CH<sub>2</sub>), 5.65 (s, 0.64H, =CH<sub>2</sub>), 6.27 (s, 0.36H, CH), 6.40 (s, 0.64H, CH), 6.76-6.80 (m, 3H, Ar), 6.92-6.96 (m, 1H, Ar), 6.99-7.16 (m, 2H, Ar), 7.23-7.35 (m, 5H, Ar), 7.46-7.51 (m, 2H, Ar); <sup>19</sup>F NMR (CDCl<sub>3</sub>, 376 MHz, CFCl<sub>3</sub>):  $\delta$  -114.83, -114.69.

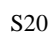

实验时间: 2011-07-20, 18:39:22  
谱图文件: D:\HPLC\SIOC液相\MBH AAA\wd-4-86-race.org

实验者:  
报告时间: 2012-01-05, 20:43:07  
积分方法: 面积归一法

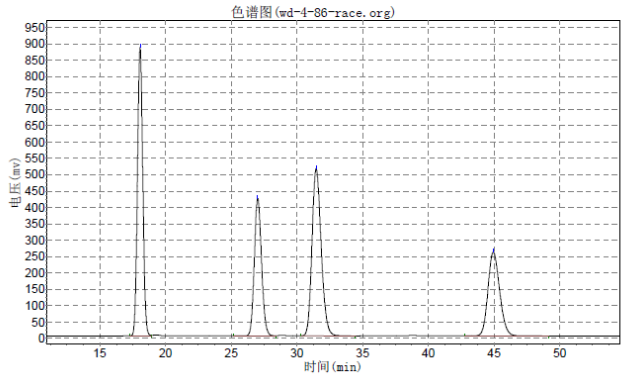

| 分析结果表 |    |        |             |              |          |
|-------|----|--------|-------------|--------------|----------|
| 峰号    | 峰名 | 保留时间   | 峰高          | 峰面积          | 含量       |
| 1     |    | 18.073 | 881430.250  | 24778986.000 | 30.4113  |
| 2     |    | 27.023 | 419636.563  | 16027287.000 | 19.6703  |
| 3     |    | 31.468 | 510919.063  | 24940930.000 | 30.6101  |
| 4     |    | 44.942 | 256138.547  | 15732261.000 | 19.3083  |
| 总计    |    |        | 2068124.422 | 81479464.000 | 100.0000 |

| 峰参数表 |        |       |             |       |       |        |            |
|------|--------|-------|-------------|-------|-------|--------|------------|
| 峰宽   | 斜率     | 漂移    | 最小面积        | 时间变参  | 锁定时间  | 停止时间   | 样品重量       |
| 5    | 70.000 | 0.000 | 1000000.000 | 0.000 | 0.000 | 59.237 | 10000.0000 |

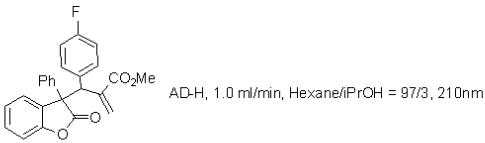

实验时间: 2011-07-20, 19:44:06  
谱图文件: D:\HPLC\SIOC液相\MEH AAA\wd-4-81-optical.org

实验者:  
报告时间: 2012-01-05, 20:44:02  
积分方法: 面积归一法

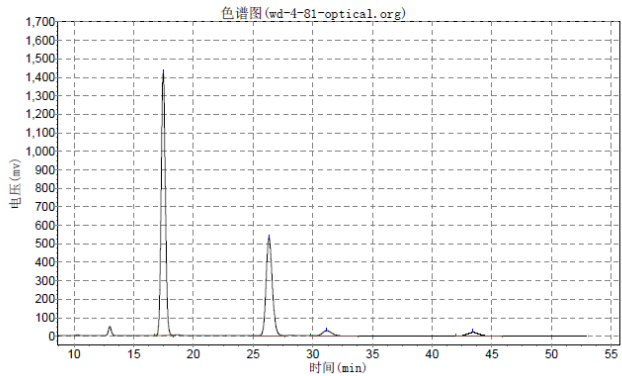

| 分析结果表 |    |        |             |              |          |
|-------|----|--------|-------------|--------------|----------|
| 峰号    | 峰名 | 保留时间   | 峰高          | 峰面积          | 含量       |
| 1     |    | 17.460 | 1417212.625 | 34751088.000 | 61.5959  |
| 2     |    | 26.322 | 529177.625  | 19091314.000 | 33.8391  |
| 3     |    | 31.167 | 27199.533   | 1490820.000  | 2.6425   |
| 4     |    | 43.432 | 19096.063   | 1084653.250  | 1.9225   |
| 总计    |    |        | 1992685.846 | 56417875.250 | 100.0000 |

| 峰参数表 |        |       |             |       |       |        |            |
|------|--------|-------|-------------|-------|-------|--------|------------|
| 峰宽   | 斜率     | 漂移    | 最小面积        | 时间变参  | 锁定时间  | 停止时间   | 样品重量       |
| 5    | 70.000 | 0.000 | 1000000.000 | 0.000 | 0.000 | 52.958 | 10000.0000 |

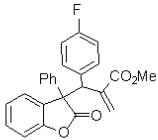

AD-H, 1.0 mL/min, Hexane/*i*PrOH = 97/3, 210nm

Enantiomeric excess was determined by HPLC with a Chiralcel AD-H column, Hexane/*i*PrOH = 97/3, 0.5 mL/min, 210 nm, for *syn* product  $t_{major} = 17.460$  min,  $t_{minor} = 31.167$  min; for *anti* product  $t_{major} = 26.322$  min,  $t_{minor} = 43.432$  min;

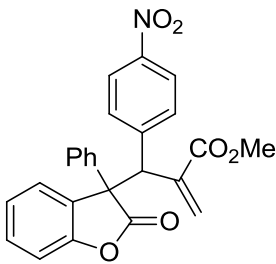

Methyl 2-((4-nitrophenyl)(2-oxo-3-phenyl-2,3-dihydrobenzofuran-3-yl)methyl)acrylate **3h**

A white solid, this is a known compound,<sup>5</sup> 98% yield, 42 mg (*syn:anti* = 58:42);  $[\alpha]_D^{20} = -171.4$  (c 2.8, CHCl<sub>3</sub>) for 95% ee (*syn*) and 92% ee (*anti*); Enantiomeric excess was determined by HPLC with a Chiralcel AD-H column, Hexane/*i*PrOH = 90/10, 1.0 mL/min, 210 nm, for *syn* product  $t_{major} = 22.917$  min,  $t_{minor} = 28.935$  min; for *anti* product  $t_{major} = 51.235$  min,  $t_{minor} = 44.657$  min; <sup>1</sup>H NMR (400 MHz, CDCl<sub>3</sub>, TMS):  $\delta$  3.49 (s, 1.26H, CH<sub>3</sub>), 3.66 (s, 1.74H, CH<sub>3</sub>), 5.45 (s, 0.58H, =CH<sub>2</sub>), 5.52 (s, 0.42H, =CH<sub>2</sub>), 5.65 (d, *J* = 1.2 Hz, 0.42H,

=CH<sub>2</sub>), 5.75 (s, 0.58H, =CH<sub>2</sub>), 6.37 (s, 0.42H, CH), 6.49 (s, 0.58H, CH), 6.95-7.05 (m, 3H, Ar), 7.15-7.19 (m, 1H, Ar), 7.22-7.25 (m, 1H, Ar), 7.29-7.38 (m, 4H, Ar), 7.44-7.49 (m, 2H, Ar), 7.95-7.97 (m, 2H, Ar).

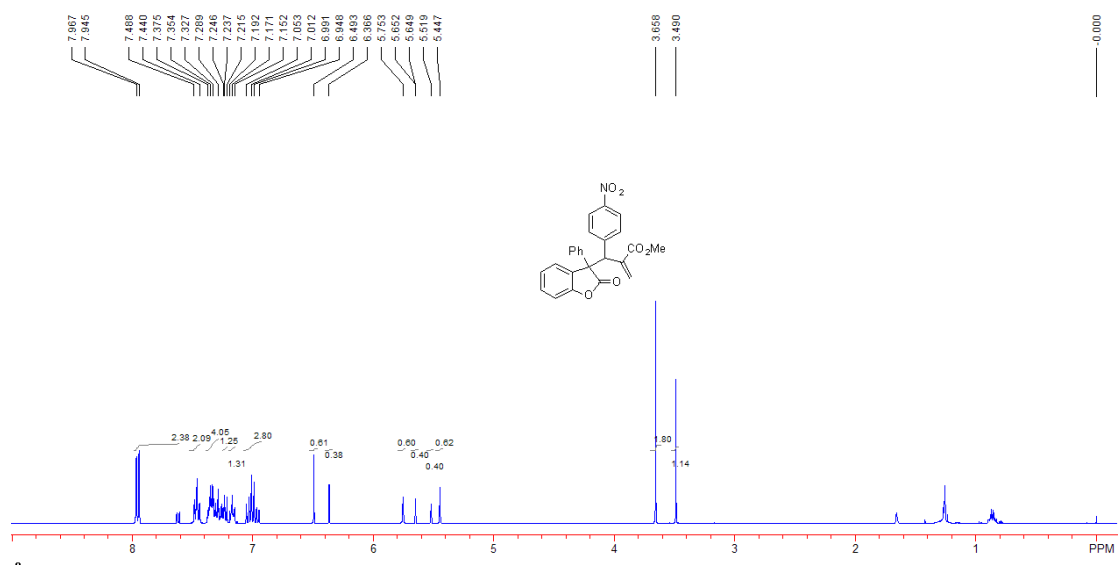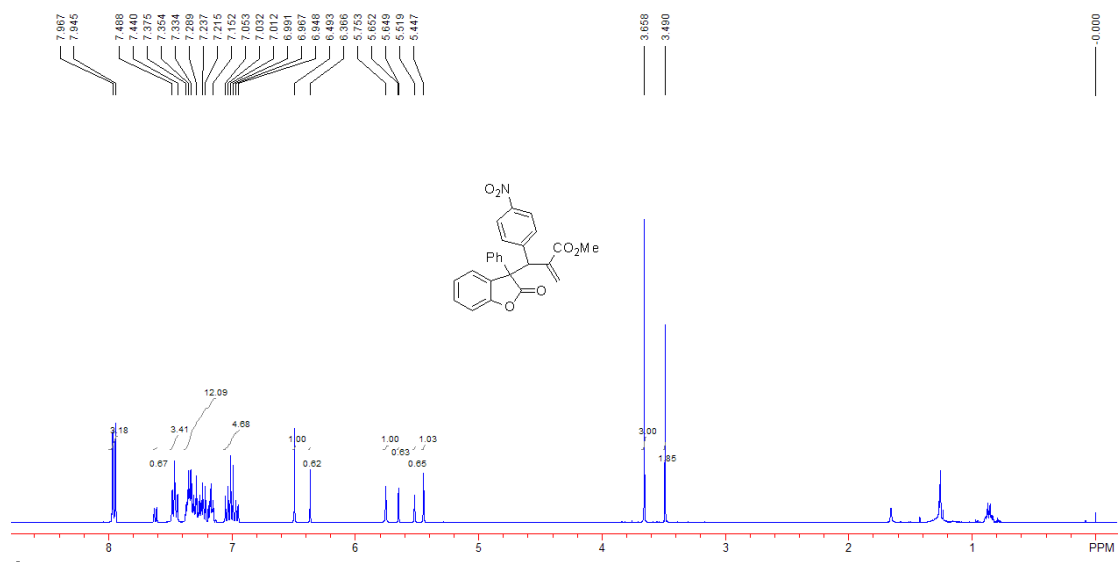

实验时间: 2011-07-21, 17:25:06  
谱图文件: D:\HPLC\SI0C液相\MBH AAA\wd-4-85-race-re.org  
实验者:  
报告时间: 2012-01-05, 20:37:29  
积分方法: 面积归一法

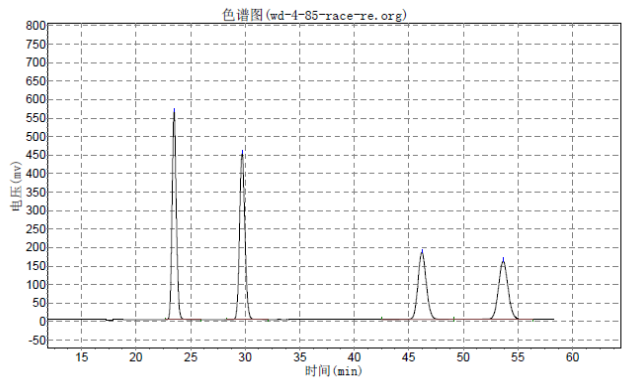

| 分析结果表 |    |        |             |              |          |
|-------|----|--------|-------------|--------------|----------|
| 峰号    | 峰名 | 保留时间   | 峰高          | 峰面积          | 含量       |
| 1     |    | 23.488 | 562525.188  | 15296004.000 | 30.8059  |
| 2     |    | 29.725 | 449054.969  | 15251658.000 | 30.7166  |
| 3     |    | 46.202 | 181389.391  | 9631626.000  | 19.3979  |
| 4     |    | 53.648 | 156549.188  | 9473547.000  | 19.0796  |
| 总计    |    |        | 1349518.734 | 49652835.000 | 100.0000 |

| 峰参数表 |        |       |             |       |       |        |            |
|------|--------|-------|-------------|-------|-------|--------|------------|
| 峰宽   | 斜率     | 漂移    | 最小面积        | 时间变参  | 锁定时间  | 停止时间   | 样品重量       |
| 5    | 70.000 | 0.000 | 1000000.000 | 0.000 | 0.000 | 58.270 | 10000.0000 |

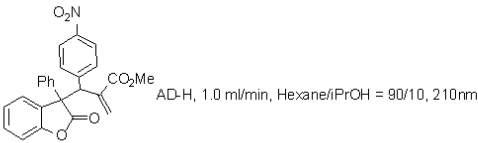

实验时间: 2011-07-21, 18:22:49  
谱图文件: D:\HPLC\SIOC液相\MBH AAA\wd-4-82-optical.org

实验者:  
报告时间: 2012-01-05, 20:52:14  
积分方法: 面积归一法

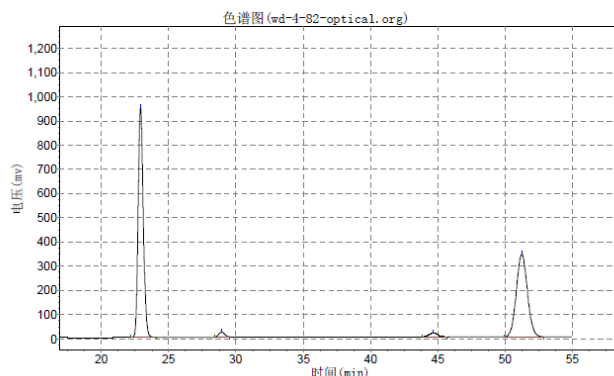

| 分析结果表 |    |        |             |              |          |
|-------|----|--------|-------------|--------------|----------|
| 峰号    | 峰名 | 保留时间   | 峰高          | 峰面积          | 含量       |
| 1     |    | 22.917 | 946530.500  | 24926378.000 | 54.4200  |
| 2     |    | 28.935 | 20818.945   | 640249.438   | 1.3978   |
| 3     |    | 44.657 | 15449.302   | 736323.188   | 1.6076   |
| 4     |    | 51.235 | 340435.938  | 19500780.000 | 42.5747  |
| 总计    |    |        | 1323234.685 | 45803730.625 | 100.0000 |

| 峰参数表 |        |       |            |       |       |        |            |
|------|--------|-------|------------|-------|-------|--------|------------|
| 峰宽   | 斜率     | 漂移    | 最小面积       | 时间变参  | 锁定时间  | 停止时间   | 样品重量       |
| 5    | 70.000 | 0.000 | 100000.000 | 0.000 | 0.000 | 54.948 | 10000.0000 |

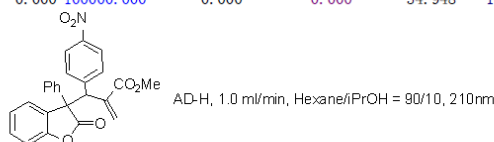

Enantiomeric excess was determined by HPLC with a Chiralcel AD-H column, Hexane/*i*PrOH = 90/10, 1.0 mL/min, 210 nm, for *syn* product  $t_{major} = 22.917$  min,  $t_{minor} = 28.935$  min; for *anti* product  $t_{major} = 51.235$  min,  $t_{minor} = 44.657$  min

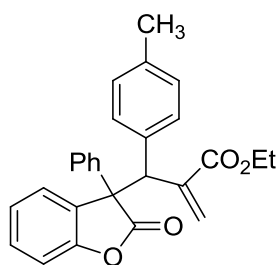

Ethyl 2-((2-oxo-3-phenyl-2,3-dihydrobenzofuran-3-yl)(p-tolyl)methyl)acrylate **3i**

A colorless oil, 85% yield, 35 mg (*syn:anti* = 56:44);  $[\alpha]_D^{20} = -187.7$  (c 1.2, CHCl<sub>3</sub>) for 95% ee (*syn*) and 92% ee (*anti*); Enantiomeric excess was determined by HPLC with a Chiralcel OD-H column, Hexane/*i*PrOH = 98/2, 1.0 mL/min, 210 nm, for *syn* product  $t_{major} = 14.540$  min,  $t_{minor} = 29.405$  min; for *anti* product  $t_{major} = 33.103$  min,  $t_{minor} = 42.455$  min; <sup>1</sup>H NMR (400 MHz, CDCl<sub>3</sub>, TMS):  $\delta$  1.07 (t,  $J = 9.6$  Hz, 1.32H, CH<sub>3</sub>), 1.18 (t,  $J = 9.6$  Hz, 1.68H, CH<sub>3</sub>), 2.20 (s, 1.32H, CH<sub>3</sub>), 2.24 (s, 1.68H, CH<sub>3</sub>), 3.75-3.96 (m, 0.88H, CH<sub>2</sub>), 4.00-4.17 (m, 1.12H,

CH<sub>2</sub>), 5.35 (s, 0.56H, =CH<sub>2</sub>), 5.37 (s, 0.44H, =CH<sub>2</sub>), 5.55 (s, 0.44H, =CH<sub>2</sub>), 5.56 (s, 0.56H, =CH<sub>2</sub>), 6.25 (s, 0.44H, CH), 6.38 (s, 0.56H, CH), 6.67-6.84 (m, 2H, Ar), 6.88-7.04 (m, 3H, Ar), 7.23-7.37 (m, 5H, Ar), 7.48-7.66 (m, 2H, Ar); <sup>13</sup>C NMR (CDCl<sub>3</sub>, 100 MHz): δ 13.86, 13.95, 20.99, 21.43, 52.65, 53.21, 59.51, 59.59, 60.95, 61.09, 110.84, 111.00, 123.67, 123.72, 125.26, 126.85, 127.41, 127.47, 127.54, 127.71, 127.83, 127.96, 128.19, 128.36, 128.48, 128.61, 128.73, 128.99, 129.23, 129.45, 129.50, 129.71, 132.06, 133.99, 136.64, 136.90, 137.15, 137.91, 139.13, 139.92, 152.69, 153.17, 166.39, 167.35, 176.50, 176.79; IR (neat) ν 2980, 1796, 1712, 1460, 1232, 1127, 1061, 734, 696 cm<sup>-1</sup>; MS (ESI) *m/z* 413.1 (M+H<sup>+</sup>, 100). HRMS (ESI) Calcd. for C<sub>27</sub>H<sub>25</sub>O<sub>4</sub> requires (M+H<sup>+</sup>) 413.1675, Found: 413.1738.

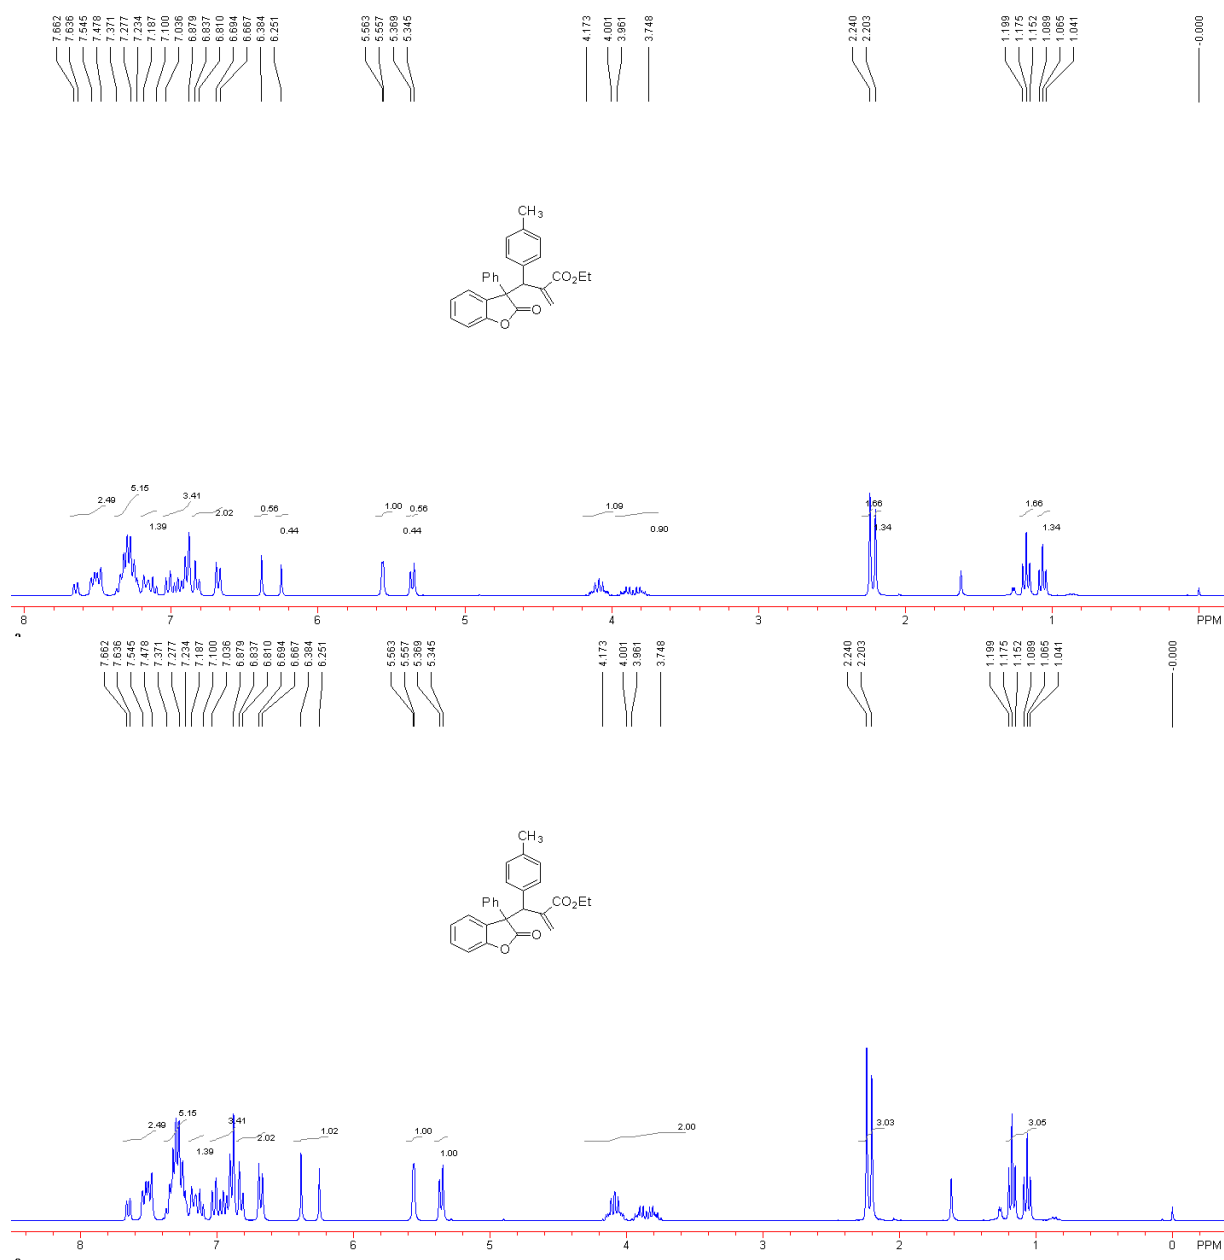

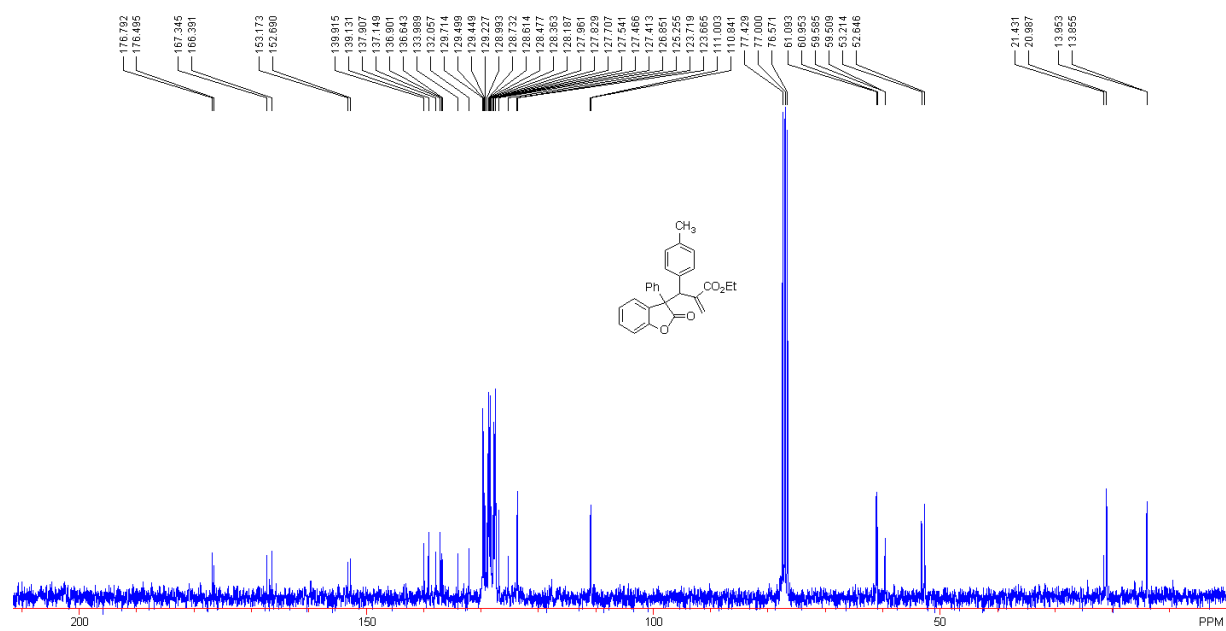

N2000 数据工作站 1

实验时间: 2012-03-31, 19:28:33  
谱图文件: I:\SIOC液相\MEH AAA\wd-9-43od9821.0210-race.org  
实验者:  
报告时间: 2012-04-03, 14:43:00  
积分方法: 面积归一法  
使用仪器类型: 气相色谱  
检测器: FID  
进样器: 分流  
柱温: 程序升温

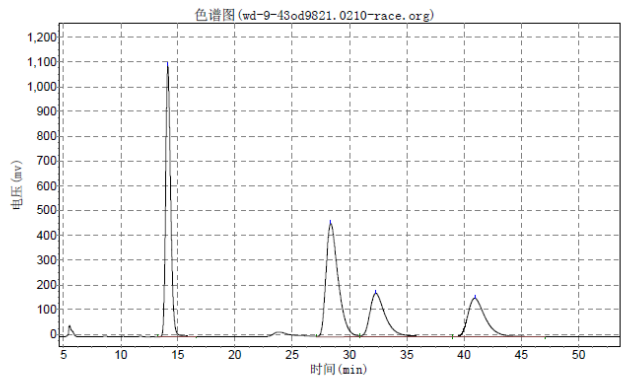

| 分析结果表 |    |        |             |              |          |
|-------|----|--------|-------------|--------------|----------|
| 峰号    | 峰名 | 保留时间   | 峰高          | 峰面积          | 含量       |
| 1     |    | 14.127 | 1095313.500 | 33259882.000 | 33.2720  |
| 2     |    | 28.345 | 458065.438  | 33680548.000 | 33.6929  |
| 3     |    | 32.285 | 175899.250  | 16685321.000 | 16.6914  |
| 4     |    | 40.923 | 155865.781  | 16337720.000 | 16.3437  |
| 总计    |    |        | 1885143.969 | 99963471.000 | 100.0000 |

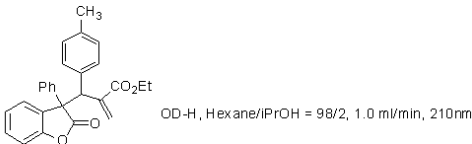

实验时间: 2012-03-31, 20:22:12  
谱图文件: I:\SIOC液相\MRH AAA\wd-9-43od9821.0210-optical.org  
实验者:  
报告时间: 2012-04-03, 14:45:11  
积分方法: 面积归一法

使用仪器类型: 气相色谱

检测器: FID

进样器: 分流

柱温: 程序升温

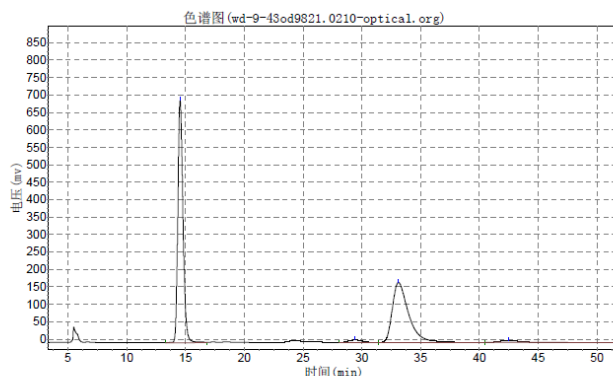

分析结果表

| 峰号 | 峰名 | 保留时间   | 峰高         | 峰面积          | 含量       |
|----|----|--------|------------|--------------|----------|
| 1  |    | 14.540 | 695013.750 | 21220052.000 | 54.6432  |
| 2  |    | 29.405 | 6819.312   | 505141.094   | 1.3008   |
| 3  |    | 33.103 | 171789.922 | 16434251.000 | 42.3194  |
| 4  |    | 42.455 | 5125.742   | 674376.750   | 1.7366   |
| 总计 |    |        | 878748.726 | 38833820.844 | 100.0000 |

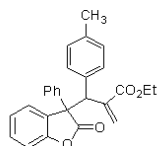

OD-H, Hexane/iPrOH = 98/2, 1.0 mL/min, 210nm

Enantiomeric excess was determined by HPLC with a Chiralcel OD-H column, Hexane/*i*PrOH = 98/2, 1.0 mL/min, 210 nm, for *syn* product  $t_{major} = 14.540$  min,  $t_{minor} = 29.405$  min; for *anti* product  $t_{major} = 33.103$  min,  $t_{minor} = 42.455$  min

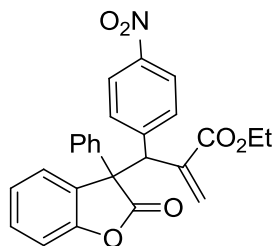

Ethyl 2-((4-nitrophenyl)(2-oxo-3-phenyl-2,3-dihydrobenzofuran-3-yl)methyl)acrylate **3j**

A yellowish solid, 95% yield, 42 mg, m.p. 65-67 °C, (*syn:anti* = 55:45);  $[\alpha]_D^{20} = -229.1$  (c 2.0, CHCl<sub>3</sub>) for 93% (*syn*) and 88% (*anti*) ee; Enantiomeric excess was determined by HPLC with a Chiralcel AD-H column, Hexane/*i*PrOH = 95/5, 0.8 mL/min, 230 nm, for *syn* product  $t_{major} = 15.727$  min,  $t_{minor} = 19.227$  min; for *anti* product  $t_{major} = 34.527$  min,  $t_{minor} = 31.077$  min; <sup>1</sup>H NMR (400 MHz, CDCl<sub>3</sub>, TMS):  $\delta$  1.08 (t, *J* = 6.8 Hz, 1.35H, CH<sub>3</sub>), 1.18 (t, *J* = 6.8 Hz, 1.65H, CH<sub>3</sub>), 3.86-4.00 (m, 0.90H, CH<sub>2</sub>), 4.03-4.17 (m, 1.10H, CH<sub>2</sub>), 5.45 (s, 0.55H, =CH<sub>2</sub>), 5.53 (s, 0.45H, =CH<sub>2</sub>), 5.65 (d, *J* = 1.2 Hz, 0.45H, =CH<sub>2</sub>), 5.72 (s, 0.55H, =CH<sub>2</sub>), 6.37 (s, 0.45H, CH),

6.49 (s, 0.55H, CH), 6.95-7.06 (m, 3H, Ar), 7.15-7.37 (m, 6H, Ar), 7.43-7.49 (m, 2H, Ar), 7.61-7.97 (m, 2H, Ar);  $^{13}\text{C}$  NMR ( $\text{CDCl}_3$ , 100 MHz):  $\delta$  13.88, 13.93, 52.87, 52.91, 59.25, 59.45, 61.34, 61.43, 111.26, 111.28, 122.78, 123.01, 124.15, 124.27, 126.19, 126.79, 127.23, 127.30, 128.10, 128.31, 128.33, 128.88, 129.00, 129.12, 129.83, 129.93, 130.71, 130.75, 136.29, 137.06, 137.93, 138.54, 143.34, 144.99, 146.90, 147.27, 152.53, 152.75, 165.95, 176.13; IR (neat)  $\nu$  2981, 1800, 1716, 1597, 1521, 1347, 1065, 757, 699  $\text{cm}^{-1}$ ; MS (ESI)  $m/z$  466.4 ( $\text{M}+\text{Na}^+$ , 100). HRMS (ESI) Calcd. for  $\text{C}_{26}\text{H}_{21}\text{NO}_6\text{Na}$  requires ( $\text{M}+\text{Na}^+$ ) 466.1268, Found: 466.1261.

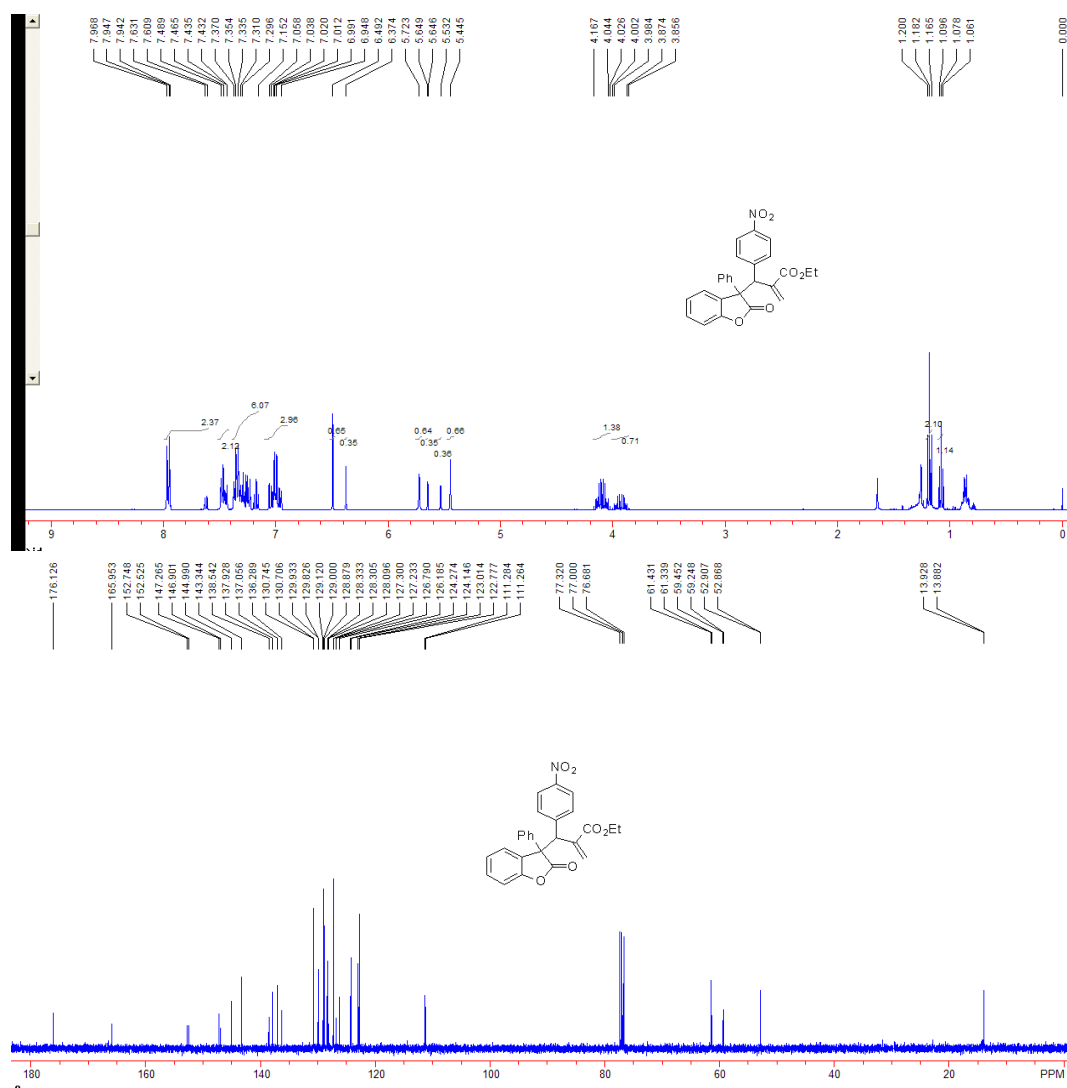

HPLC REPORT

Sample Name:wd-4-95-A-rac ad250 95 0.8.che      Date:2011-08-22  
Time:12:30      Method:  
column:      the mobile phase:  
Velocity:      the detection wavelength:

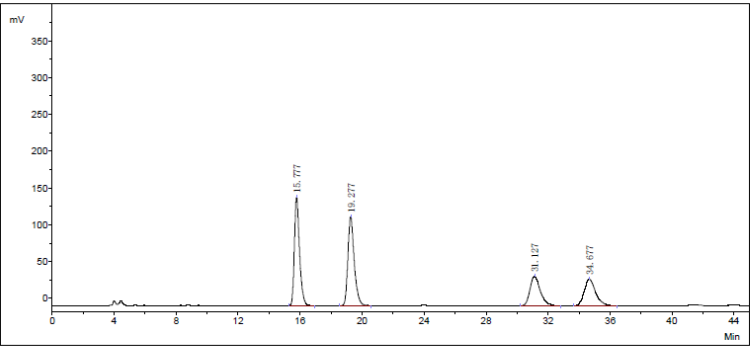

| No.   | PeakNo | R. Time | PeakHeight | PeakArea   | PerCent  |
|-------|--------|---------|------------|------------|----------|
| 1     | 1      | 15.777  | 146972.8   | 3380264.2  | 32.3040  |
| 2     | 2      | 19.277  | 120208.5   | 3393885.9  | 32.4341  |
| 3     | 3      | 31.127  | 39912.9    | 1839532.1  | 17.5797  |
| 4     | 4      | 34.677  | 35955.1    | 1850246.1  | 17.6821  |
| Total |        |         | 343049.3   | 10463928.3 | 100.0000 |

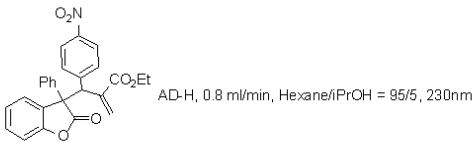

HPLC REPORT

Sample Name:wd-4-95-A.che      Date:2011-08-22  
Time:13:39      Method:  
column:      the mobile phase:  
Velocity:      the detection wavelength:

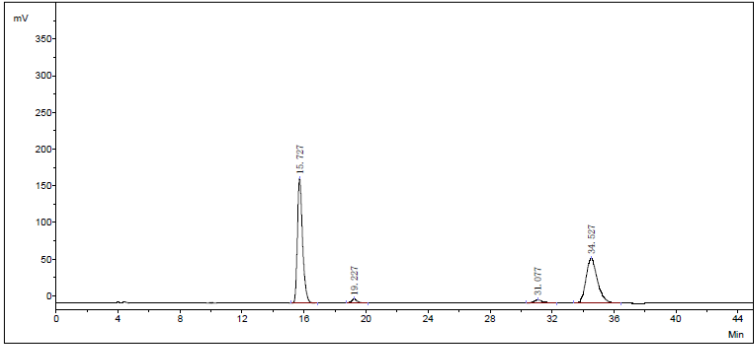

| No.   | PeakNo | R. Time | PeakHeight | PeakArea  | PerCent  |
|-------|--------|---------|------------|-----------|----------|
| 1     | 1      | 15.727  | 169650.8   | 3919545.2 | 52.9898  |
| 2     | 2      | 19.227  | 5306.2     | 145880.2  | 1.9722   |
| 3     | 3      | 31.077  | 4488.4     | 200468.8  | 2.7102   |
| 4     | 4      | 34.527  | 61063.8    | 3130898.5 | 42.3278  |
| Total |        |         | 240509.2   | 7396792.7 | 100.0000 |

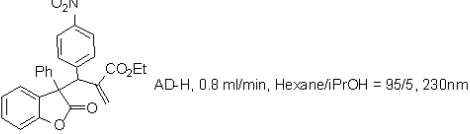

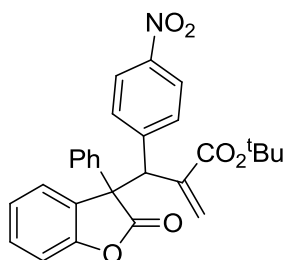

Tert-butyl 2-((4-nitrophenyl)(2-oxo-3-phenyl-2,3-dihydrobenzofuran-3-yl)methyl)acrylate **3k**

A white solid, 87% yield, 41 mg, m.p. 147-149 °C, (*syn:anti* = 54:46);  $[\alpha]_D^{20} = -119.7$  (c 1.8, CHCl<sub>3</sub>) for 91% ee (*syn*) and 85% ee (*anti*); Enantiomeric excess was determined by HPLC with a Chiralcel AD-H column, Hexane/*i*PrOH = 93/7, 0.5 mL/min, 230 nm, for *syn* product  $t_{major} = 17.477$  min,  $t_{minor} = 14.977$  min; for *anti* product  $t_{major} = 19.777$  min,  $t_{minor} = 16.177$  min; <sup>1</sup>H NMR (400 MHz, CDCl<sub>3</sub>, TMS): δ 1.22 (s, 4.14H, <sup>t</sup>Bu), 1.34 (s, 4.86H, <sup>t</sup>Bu), 5.41 (s, 0.54H, =CH<sub>2</sub>), 5.52 (s, 0.46H, =CH<sub>2</sub>), 5.55 (s, 0.54H, =CH<sub>2</sub>), 5.61 (s, 0.46H, =CH<sub>2</sub>), 6.33 (s, 0.46H, CH), 6.40 (s, 0.54H, CH), 6.90-7.07 (m, 3H, Ar), 7.15-7.49 (m, 8H, Ar), 7.96 (d, *J* = 7.2 Hz, 2H, Ar); <sup>13</sup>C NMR (CDCl<sub>3</sub>, 100 MHz): δ 27.64, 27.78, 52.41, 52.79, 59.00, 59.71, 81.69, 81.77, 111.18, 111.27, 122.68, 122.90, 124.04, 124.29, 126.33, 126.83, 127.16, 127.31, 127.85, 128.13, 128.25, 128.32, 128.45, 128.93, 129.77, 129.87, 130.66, 130.73, 136.58, 137.04, 139.21, 139.50, 143.72, 145.52, 146.72, 147.14, 152.58, 152.69, 165.00, 165.51, 176.10, 176.29; IR (neat) ν 2978, 1801, 1709, 1604, 1524, 1347, 1146, 1065, 757 cm<sup>-1</sup>; MS (ESI) *m/z* 494.5 (M+Na<sup>+</sup>, 100). HRMS (MALDI) Calcd. for C<sub>28</sub>H<sub>25</sub>NO<sub>6</sub>Na requires (M+Na<sup>+</sup>) 494.1579, Found: 494.1574.

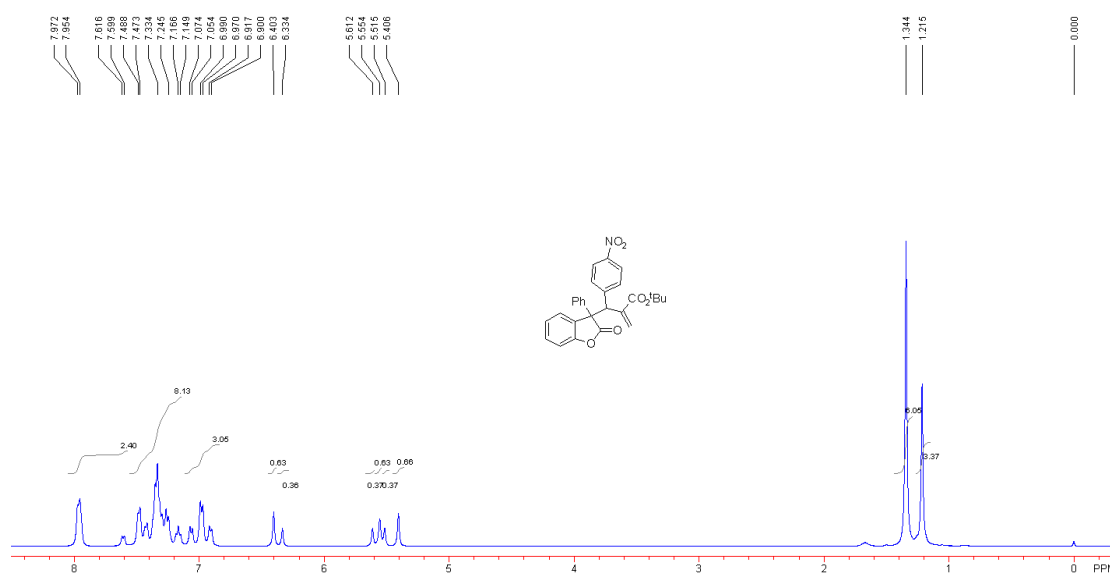

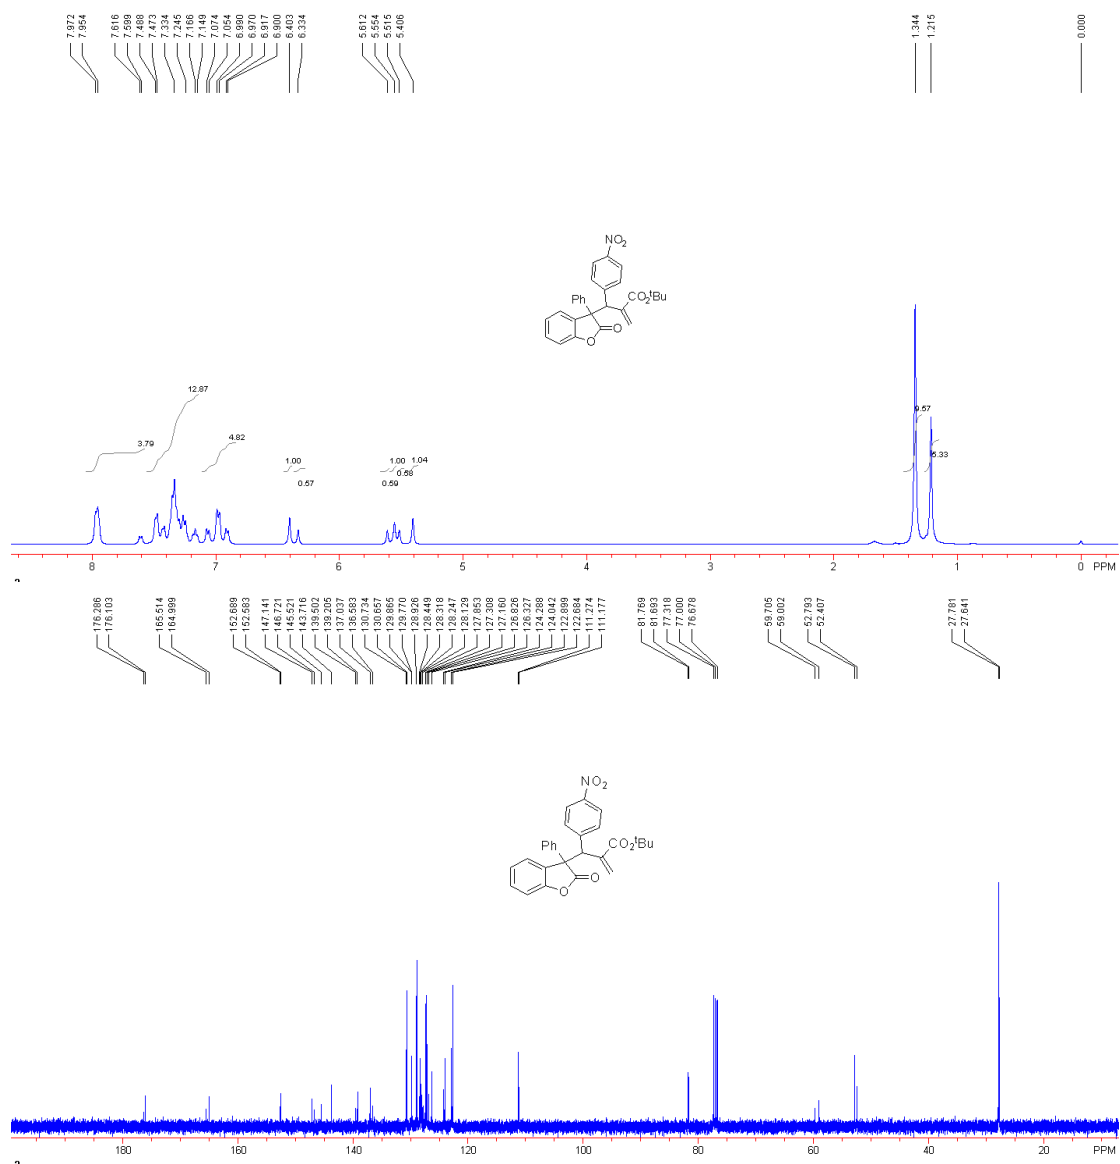

HPLC REPORT

Sample Name:wd-4-68-rac ad250 93 0.5.che      Date:2011-08-25  
Time:06:55      Method:  
column:      the mobile phase:  
Velocity:      the detection wavelength:

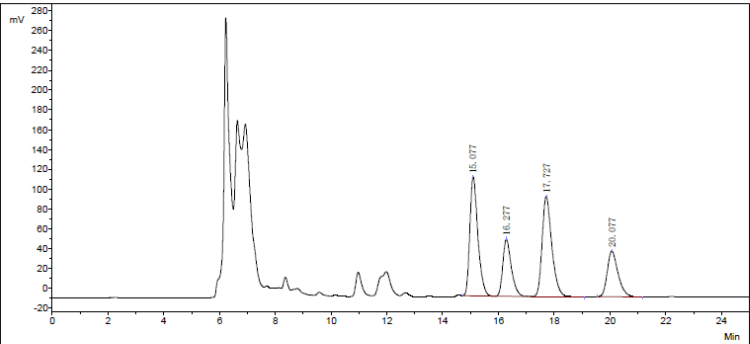

| No.   | PeakNo | R. Time | PeakHeight | PeakArea  | PerCent  |
|-------|--------|---------|------------|-----------|----------|
| 1     | 1      | 15.077  | 119233.2   | 2407450.9 | 32.9141  |
| 2     | 2      | 16.277  | 57693.0    | 1230426.5 | 16.8221  |
| 3     | 3      | 17.727  | 100400.0   | 2432569.9 | 33.2575  |
| 4     | 4      | 20.077  | 46115.0    | 1243896.3 | 17.0063  |
| Total |        |         | 323441.2   | 7314343.6 | 100.0000 |

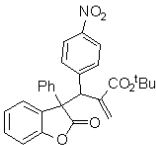

AD-H, 0.5 ml/min, Hexane/iPrOH = 93/7, 230nm

HPLC REPORT

Sample Name:wd-4-68 ad250 93 0.5.che      Date:2011-08-25  
Time:07:42      Method:  
column:      the mobile phase:  
Velocity:      the detection wavelength:

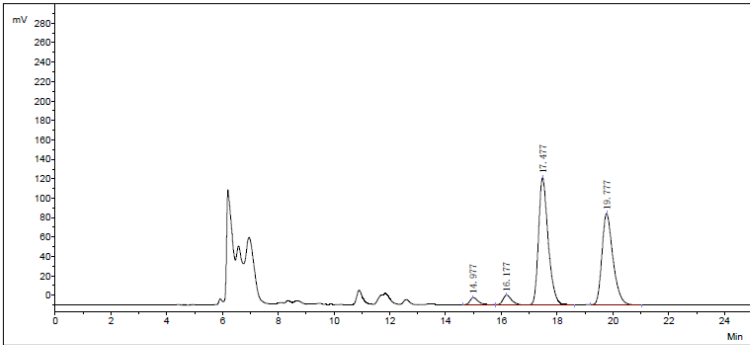

| No.   | PeakNo | R. Time | PeakHeight | PeakArea  | PerCent  |
|-------|--------|---------|------------|-----------|----------|
| 1     | 1      | 14.977  | 7345.7     | 151133.6  | 2.4949   |
| 2     | 2      | 16.177  | 10002.3    | 211709.0  | 3.4948   |
| 3     | 3      | 17.477  | 130668.9   | 3118097.1 | 51.4728  |
| 4     | 4      | 19.777  | 93824.7    | 2576822.2 | 42.5375  |
| Total |        |         | 241841.6   | 6057761.9 | 100.0000 |

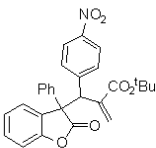

AD-H, 0.5 ml/min, Hexane/iPrOH = 93/7, 230nm

## 5. Characterization and spectra charts containing HPLC traces for products 5a-k.

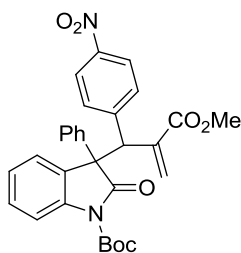

### Tert-butyl

#### 3-(2-(methoxycarbonyl)-1-(4-nitrophenyl)allyl)-2-oxo-3-phenylindoline-1-carboxylate **5a**

A white solid, 91% yield, 48 mg, m.p. 90-92 °C, (*anti:syn* = 67:33);  $[\alpha]_D^{20} = -200.0$  (c 0.1, CHCl<sub>3</sub>) for 98% ee (*anti*) and 89% ee (*syn*); Enantiomeric excess was determined by HPLC with a Chiralcel AD-H column, Hexane/*i*PrOH = 80/20, 0.7 mL/min, 230 nm, for *anti* product  $t_{major} = 7.057$  min,  $t_{minor} = 8.517$  min; for *syn* product  $t_{major} = 9.900$  min,  $t_{minor} = 17.785$  min; <sup>1</sup>H NMR (400 MHz, CDCl<sub>3</sub>, TMS): δ 1.56 (s, 9.00H, for *syn* and *anti*, Boc), 3.48 (s, 0.99H, CH<sub>3</sub>), 3.64 (s, 2.01H, CH<sub>3</sub>), 5.40 (s, 0.67H, =CH<sub>2</sub>), 5.53 (s, 0.33H, =CH<sub>2</sub>), 5.59 (s, 0.33H, =CH<sub>2</sub>), 5.97 (s, 0.67H, =CH<sub>2</sub>), 6.32 (s, 0.33H, CH), 6.49 (s, 0.67H, CH), 6.99 (d, *J* = 8.8 Hz, 2H, Ar), 7.13-7.21 (m, 1H, Ar), 7.25-7.35 (m, 5H, Ar), 7.39-7.44 (m, 2H, Ar), 7.60-7.66 (m, 1H, Ar), 7.91 (d, *J* = 8.8 Hz, 2H, Ar); <sup>13</sup>C NMR (100 MHz, CDCl<sub>3</sub>): δ 27.88, 28.03, 52.15, 52.31, 53.17, 53.26, 60.15, 60.28, 84.76, 115.05, 115.19, 122.54, 122.72, 124.17, 124.27, 125.53, 126.60, 127.57, 127.80, 127.86, 127.96, 128.60, 128.80, 128.95, 129.03, 129.20, 130.70, 130.82, 136.95, 137.36, 137.99, 138.74, 138.94, 139.60, 143.88, 145.37, 146.75, 147.09, 148.40, 166.75, 167.25, 175.19, 175.43; IR (neat) ν 2982, 1793, 1762, 1719, 1604, 1522, 1251, 1147, 738 cm<sup>-1</sup>; MS (ESI) *m/z* 551.4 (M+Na<sup>+</sup>, 100). HRMS (ESI) Calcd. for C<sub>30</sub>H<sub>28</sub>N<sub>2</sub>O<sub>7</sub>Na requires (M+Na<sup>+</sup>) 551.1797, Found: 551.1789.

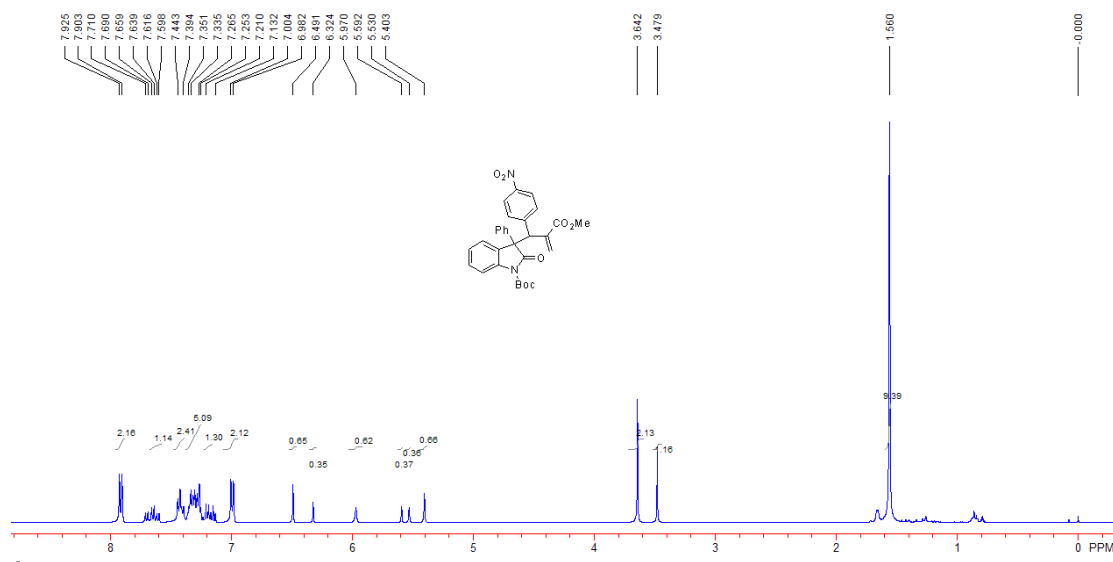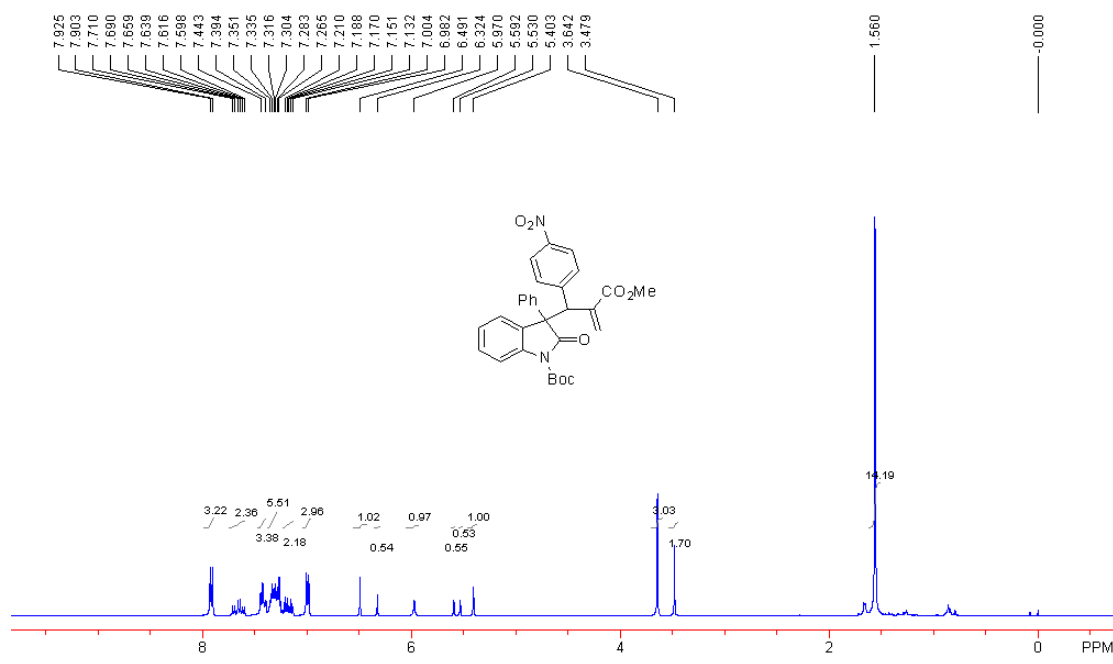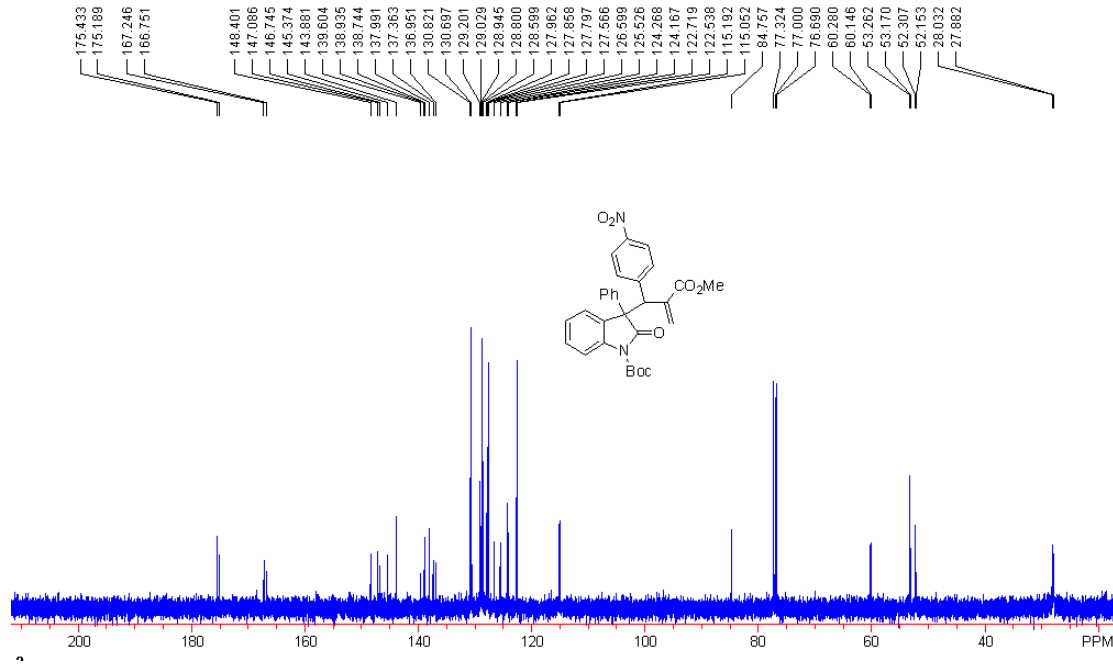

WH-500 色 谱 分 析 报 告

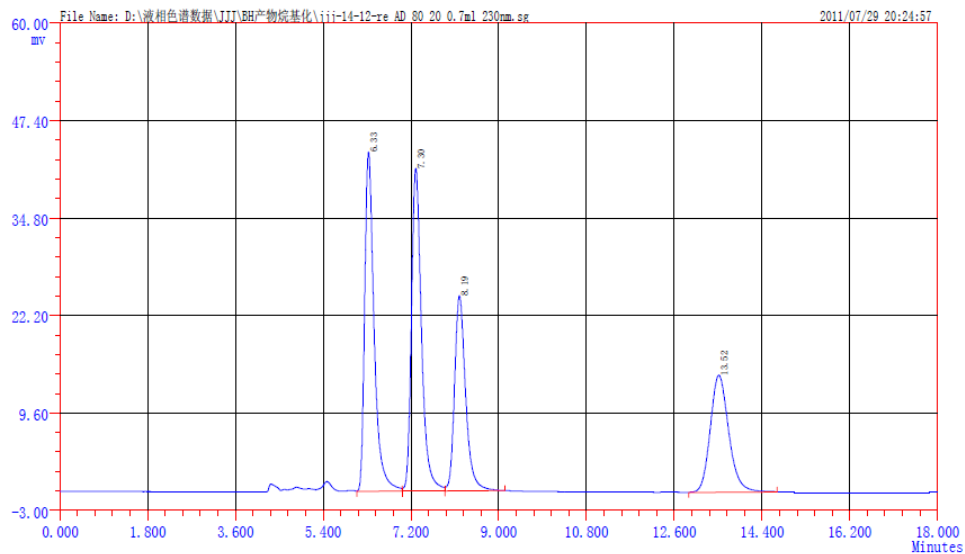

| ID | 组分名 | 保留时间   | 峰高     | 峰面积       | 浓度       | 拖尾因子 | 理论塔板 |
|----|-----|--------|--------|-----------|----------|------|------|
| 1  |     | 6.330  | 43879  | 591218.0  | 29.7703  | 1.55 | 4399 |
| 2  |     | 7.300  | 41730  | 597751.8  | 30.0993  | 1.35 | 5176 |
| 3  |     | 8.193  | 25220  | 398571.2  | 20.0697  | 1.31 | 5357 |
| 4  |     | 13.518 | 15113  | 398392.5  | 20.0607  | 1.18 | 5241 |
| Σ: |     |        | 125942 | 1985933.3 | 100.0000 |      |      |

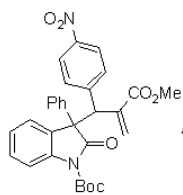

AD-H, Hexane/PrOH = 80/20, 0.7 mL/min, 230nm

## WH-500 色谱分析报告

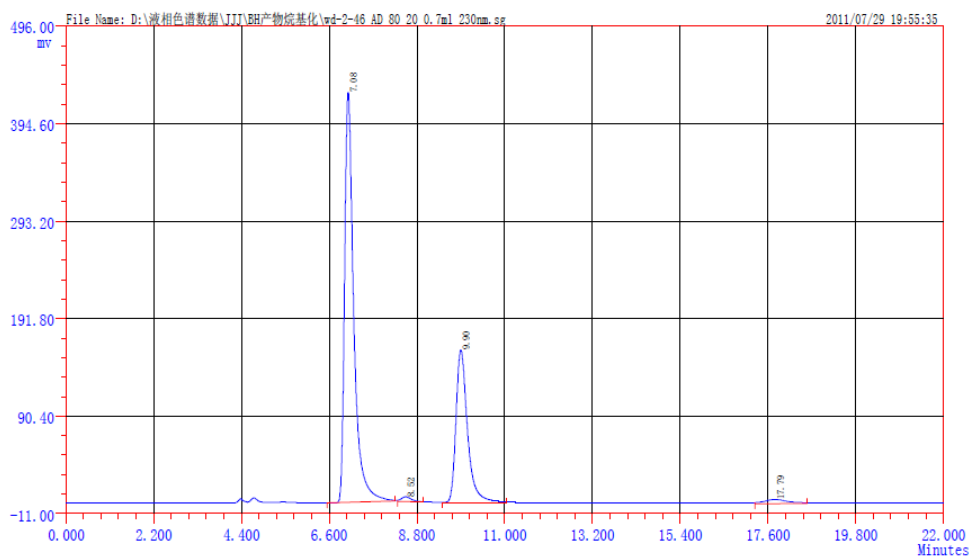

| ID         | 组分名 | 保留时间   | 峰高     | 峰面积        | 浓度       | 拖尾因子 | 理论塔板 |
|------------|-----|--------|--------|------------|----------|------|------|
| 1          |     | 7.075  | 426652 | 6854901.0  | 66.1395  | 1.69 | 3865 |
| 2          |     | 8.517  | 4970   | 86037.4    | 0.8301   | 1.20 | 4824 |
| 3          |     | 9.900  | 159276 | 3240683.8  | 31.2677  | 1.45 | 4719 |
| 4          |     | 17.785 | 4340   | 182689.9   | 1.7627   | 1.27 | 3558 |
| $\Sigma$ : |     |        | 595238 | 10364312.3 | 100.0000 |      |      |

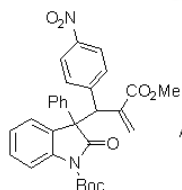

AD-H, Hexane/PrOH = 80/20, 0.7 mL/min, 254nm

Enantiomeric excess was determined by HPLC with a Chiralcel AD-H column, Hexane/*i*PrOH = 80/20, 0.7 mL/min, 230 nm, for *anti* product  $t_{major} = 7.057$  min,  $t_{minor} = 8.517$  min; for *syn* product  $t_{major} = 9.900$  min,  $t_{minor} = 17.785$  min

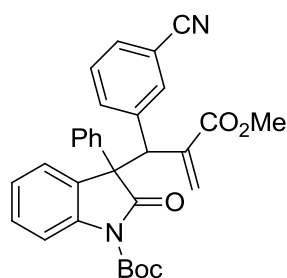

Tert-butyl

3-(1-(3-cyanophenyl)-2-(methoxycarbonyl)allyl)-2-oxo-3-phenylindoline-1-carboxylate **5b**

A white solid, this is a known compound.<sup>6</sup> 86% yield, 43 mg (*anti:syn* = 62:38);  $[\alpha]_D^{20} = -98.0$  (c 0.15, CHCl<sub>3</sub>) for 94% ee (*anti*) and 80% ee (*syn*); Enantiomeric excess was determined by HPLC with a Chiralcel AD-H column, Hexane/*i*PrOH = 90/10, 1.0 mL/min, 254 nm, for *anti* product  $t_{major} = 5.607$  min,  $t_{minor} = 6.290$  min; for *syn* product  $t_{major} = 7.147$  min,  $t_{minor} = 8.542$

min;  $^1\text{H}$  NMR (400 MHz,  $\text{CDCl}_3$ , TMS):  $\delta$  1.57 (s, 3.42H, Boc), 1.59 (s, 5.58H, Boc), 3.49 (s, 1.14H,  $\text{CH}_3$ ), 3.65 (s, 1.86H,  $\text{CH}_3$ ), 5.32 (s, 0.62H,  $=\text{CH}_2$ ), 5.43 (s, 0.38H,  $=\text{CH}_2$ ), 5.59 (d,  $J = 1.6$  Hz, 0.38H,  $=\text{CH}_2$ ), 5.98 (s, 0.62H,  $=\text{CH}_2$ ), 6.32 (s, 0.38H, CH), 6.48 (s, 0.62H, CH), 6.95-7.03 (m, 1H, Ar), 7.10-7.17 (m, 2H, Ar), 7.22-7.45 (m, 9H, Ar), 7.59-7.71 (m, 1H, Ar).

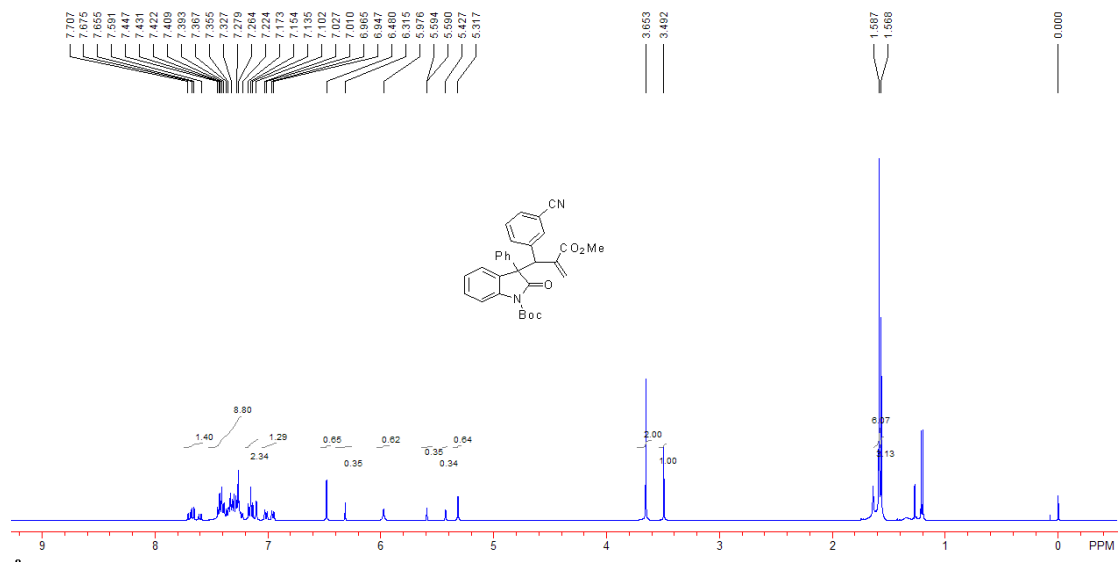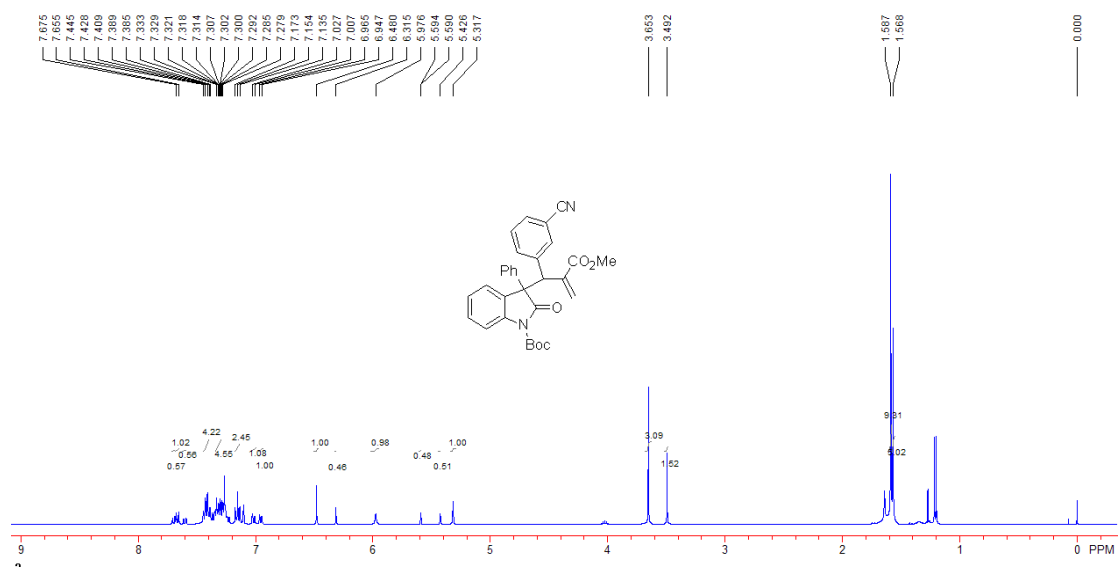

WH-500 色 谱 分 析 报 告

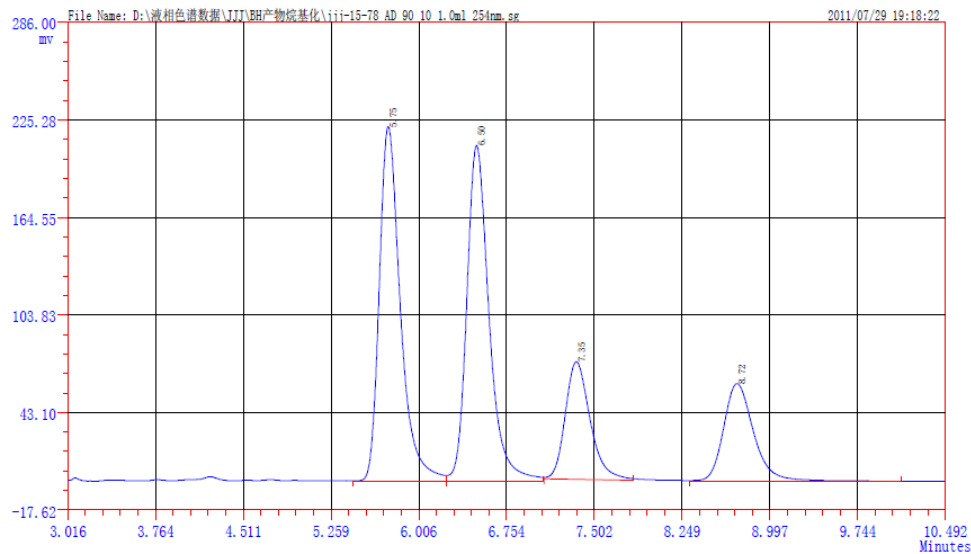

| ID | 组分名 | 保留时间  | 峰高     | 峰面积       | 浓度       | 拖尾因子 | 理论塔板 |
|----|-----|-------|--------|-----------|----------|------|------|
| 1  |     | 5.745 | 220907 | 2767386.9 | 35.9667  | 1.43 | 4192 |
| 2  |     | 6.498 | 209149 | 2765598.6 | 35.9434  | 1.30 | 4814 |
| 3  |     | 7.348 | 73159  | 1077072.4 | 13.9983  | 1.26 | 4965 |
| 4  |     | 8.717 | 60817  | 1084248.5 | 14.0916  | 1.26 | 4765 |
| Σ: |     |       | 564032 | 7694306.3 | 100.0000 |      |      |

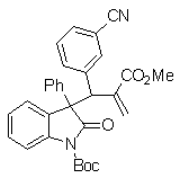

AD-H, Hexane/PrOH = 90/10, 1.0 mL/min, 254nm

## WH-500 色谱分析报告

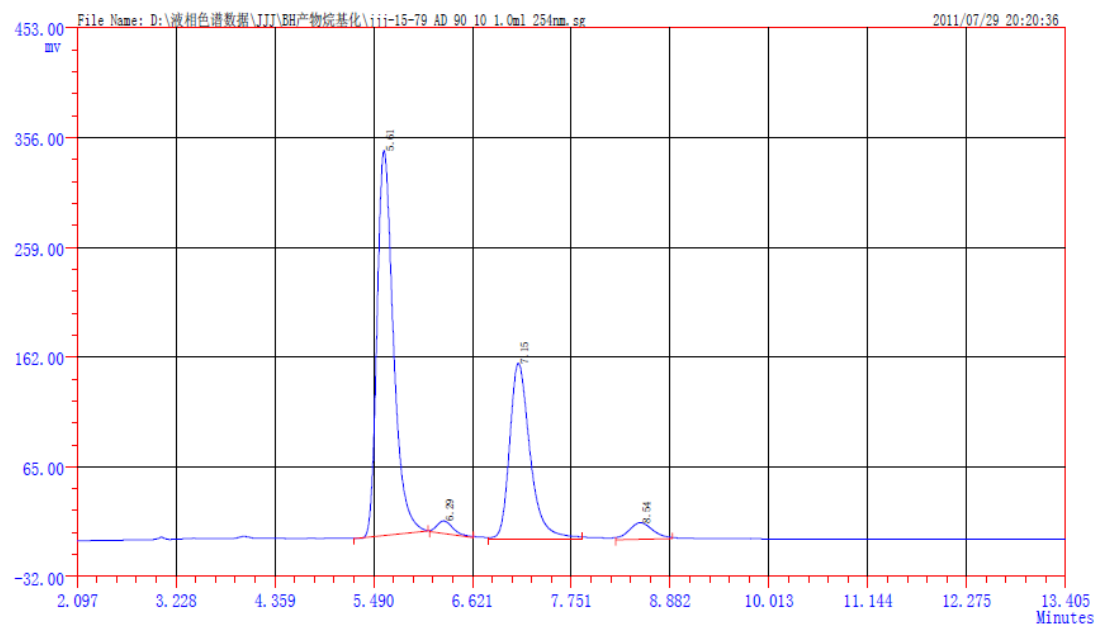

| ID | 组分名 | 保留时间  | 峰高     | 峰面积       | 浓度       | 拖尾因子 | 理论塔板 |
|----|-----|-------|--------|-----------|----------|------|------|
| 1  |     | 5.607 | 340419 | 4435880.2 | 60.1622  | 1.45 | 3690 |
| 2  |     | 6.290 | 11063  | 143806.5  | 1.9504   | 1.04 | 4667 |
| 3  |     | 7.147 | 154922 | 2509030.1 | 34.0290  | 1.36 | 3881 |
| 4  |     | 8.542 | 14799  | 284484.0  | 3.8584   | 1.15 | 3935 |
| Σ: |     |       | 521203 | 7373200.7 | 100.0000 |      |      |

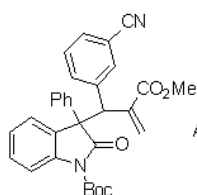

AD-H, Hexane/*i*PrOH = 90/10, 1.0 mL/min, 254nm

Enantiomeric excess was determined by HPLC with a Chiralcel AD-H column, Hexane/*i*PrOH = 90/10, 1.0 mL/min, 254 nm, for *anti* product  $t_{major} = 5.607$  min,  $t_{minor} = 6.290$  min; for *syn* product  $t_{major} = 7.147$  min,  $t_{minor} = 8.542$  min

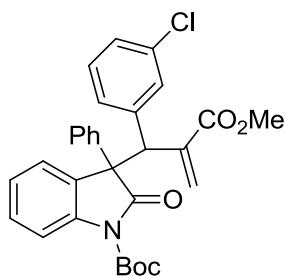

Tert-butyl

3-(1-(3-chlorophenyl)-2-(methoxycarbonyl)allyl)-2-oxo-3-phenylindoline-1-carboxylate **5c**

A white solid, this is a known compound.<sup>6</sup> 93% yield, 48 mg (*anti:syn* = 51:49);  $[\alpha]_D^{20} = -254.6$  (c 1.85, CHCl<sub>3</sub>) for 92% ee (*anti*) and 87% ee (*syn*); Enantiomeric excess was

determined by HPLC with a Chiralcel OD-H column, Hexane/<sup>i</sup>PrOH = 95/5, 0.9 mL/min, 254 nm, for *anti* product  $t_{major} = 4.915$  min,  $t_{minor} = 14.830$  min; for *syn* product  $t_{major} = 5.487$  min,  $t_{minor} = 16.798$  min; <sup>1</sup>H NMR (400 MHz, CDCl<sub>3</sub>, TMS): δ 1.55 (s, 4.41H, Boc), 1.58 (s, 4.78H, Boc), 3.46 (s, 1.47H, CH<sub>3</sub>), 3.65 (s, 1.53H, CH<sub>3</sub>), 5.29 (s, 0.51H, =CH<sub>2</sub>), 5.39 (s, 0.49H, =CH<sub>2</sub>), 5.54 (d,  $J = 1.2$  Hz, 0.49H, =CH<sub>2</sub>), 5.88 (s, 0.51H, =CH<sub>2</sub>), 6.26 (s, 0.49H, CH), 6.43 (s, 0.51H, CH), 6.64-6.82 (m, 1H, Ar), 6.94-7.15 (m, 4H, Ar), 7.23-7.36 (m, 5H, Ar), 7.42-7.46 (m, 2H, Ar), 7.59-7.74 (m, 1H, Ar).

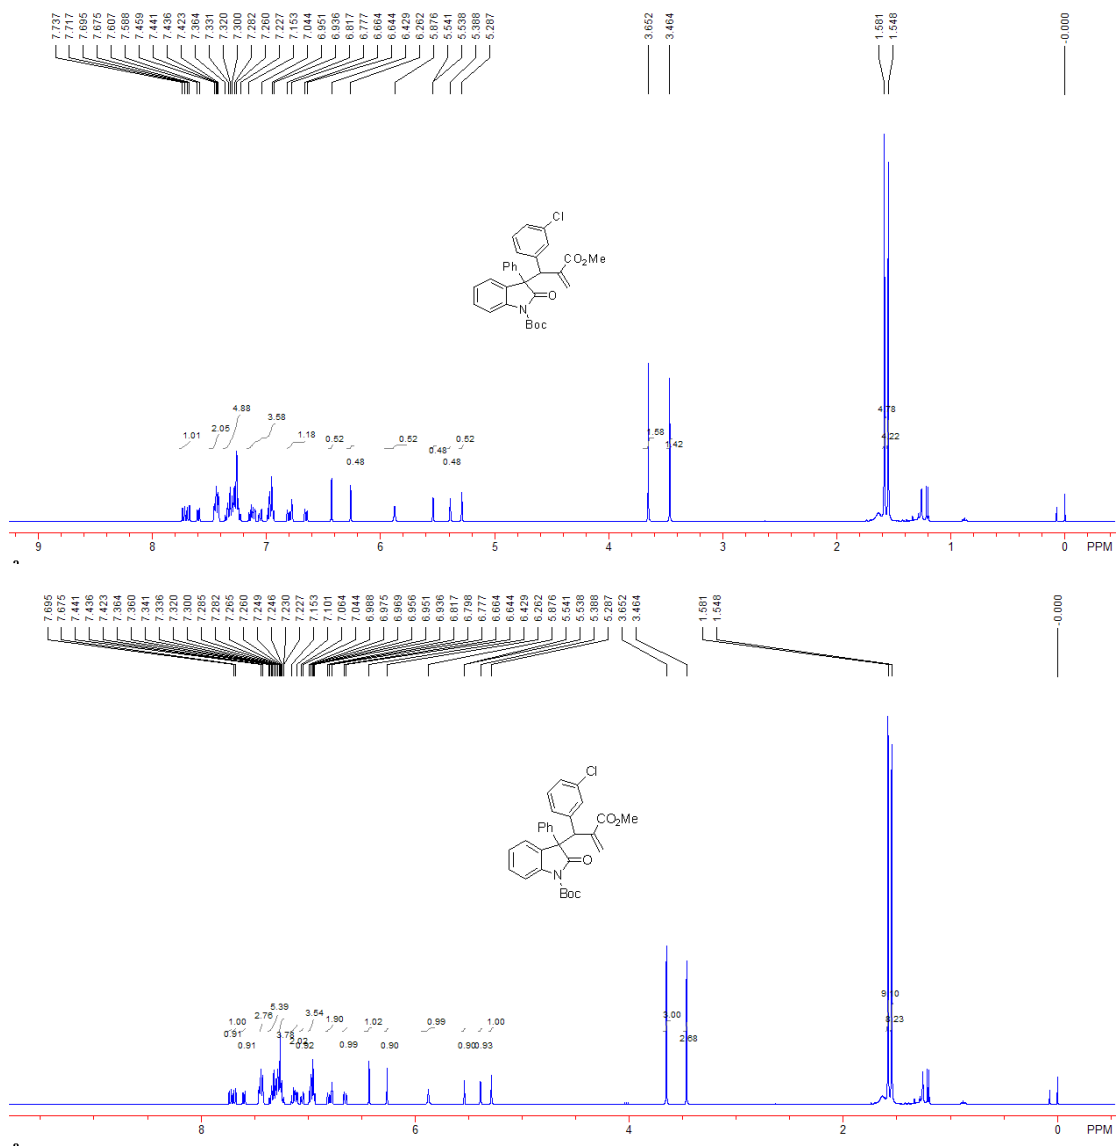

WH-500 色 谱 分 析 报 告

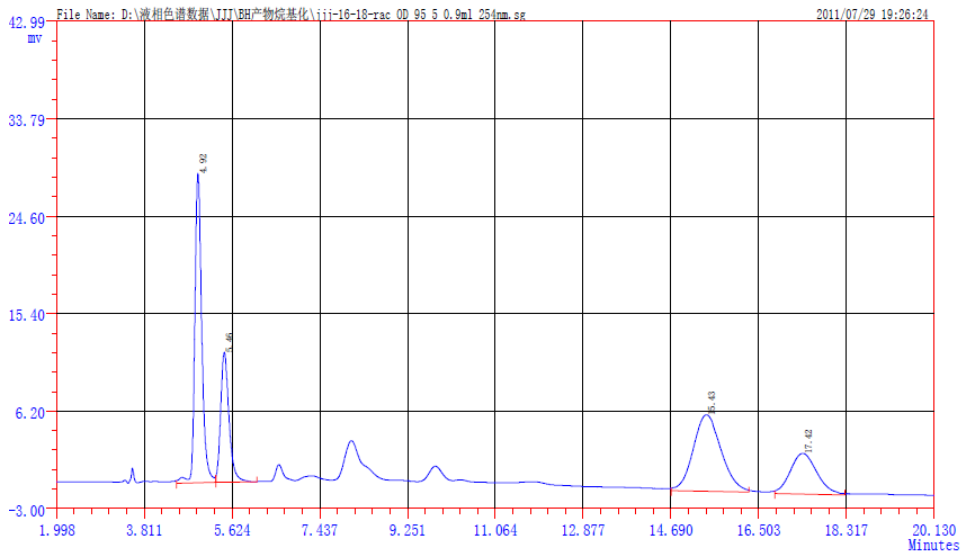

| ID | 组分名 | 保留时间   | 峰高    | 峰面积      | 浓度       | 拖尾因子 | 理论塔板 |
|----|-----|--------|-------|----------|----------|------|------|
| 1  |     | 4.918  | 29217 | 291127.9 | 33.2162  | 1.29 | 4856 |
| 2  |     | 5.463  | 12295 | 147254.9 | 16.8011  | 1.28 | 4147 |
| 3  |     | 15.427 | 7206  | 290159.4 | 33.1057  | 1.06 | 2925 |
| 4  |     | 17.422 | 3850  | 147920.2 | 16.8770  | 1.11 | 4098 |
| Σ: |     |        | 52568 | 876462.6 | 100.0000 |      |      |

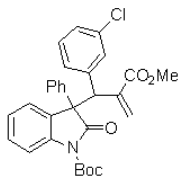

OD-H, Hexane/PrOH = 95/5, 0.9 mL/min, 254nm

## WH-500 色谱分析报告

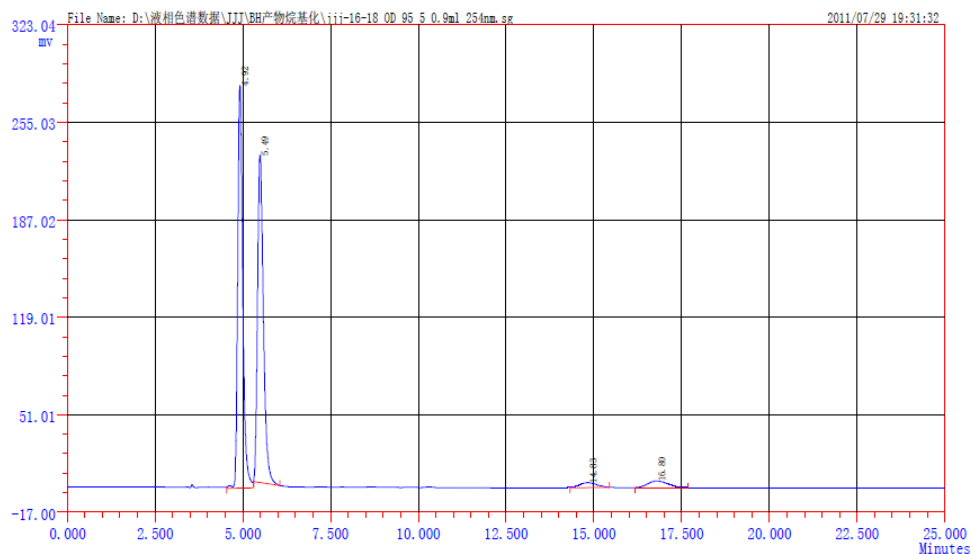

| ID | 组分名 | 保留时间   | 峰高     | 峰面积       | 浓度       | 拖尾因子 | 理论塔板 |
|----|-----|--------|--------|-----------|----------|------|------|
| 1  |     | 4.915  | 280984 | 2784728.2 | 48.5168  | 1.35 | 4902 |
| 2  |     | 5.487  | 228500 | 2648240.0 | 46.1388  | 1.36 | 4467 |
| 3  |     | 14.830 | 3432   | 120264.1  | 2.0953   | 1.13 | 3570 |
| 4  |     | 16.798 | 4664   | 186489.8  | 3.2491   | 1.19 | 3518 |
| Σ: |     |        | 517580 | 5739722.2 | 100.0000 |      |      |

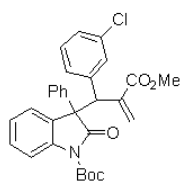

OD-H, Hexane/*i*PrOH = 95/5, 0.9 mL/min, 254nm

Enantiomeric excess was determined by HPLC with a Chiralcel OD-H column, Hexane/*i*PrOH = 95/5, 0.9 mL/min, 254 nm, for *anti* product  $t_{major} = 4.915$  min,  $t_{minor} = 14.830$  min; for *syn* product  $t_{major} = 5.487$  min,  $t_{minor} = 16.798$  min

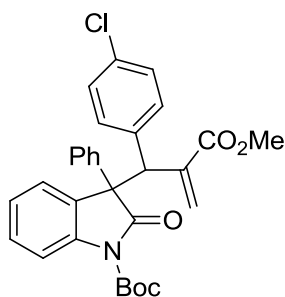

Tert-butyl

3-(1-(4-chlorophenyl)-2-(methoxycarbonyl)allyl)-2-oxo-3-phenylindoline-1-carboxylate **5d**

A white solid, this is a known compound.<sup>6</sup> 92% yield, 47 mg, m.p. 134-136 °C, (*anti*:*syn* = 59:41);  $[\alpha]_D^{20} = -203.0$  (c 0.1, CHCl<sub>3</sub>) for 93% ee (*anti*) and 88% ee (*syn*); Enantiomeric excess was determined by HPLC with a Chiralcel AD-H column, Hexane/*i*PrOH = 90/10, 0.7 mL/min, 230 nm, for *anti* product  $t_{major} = 6.652$  min,  $t_{minor} = 7.385$  min; for *syn* product  $t_{major} =$

7.985 min,  $t_{minor}$  = 13.052 min;  $^1\text{H}$  NMR (400 MHz,  $\text{CDCl}_3$ , TMS):  $\delta$  1.54 (s, 3.69H, Boc), 1.57 (s, 5.31H, Boc), 3.44 (s, 1.23H,  $\text{CH}_3$ ), 3.64 (s, 1.77H,  $\text{CH}_3$ ), 5.28 (s, 0.59H,  $=\text{CH}_2$ ), 5.39 (s, 0.41H,  $=\text{CH}_2$ ), 5.51 (d,  $J$  = 1.2 Hz, 0.41H,  $=\text{CH}_2$ ), 5.88 (s, 0.59H,  $=\text{CH}_2$ ), 6.22 (s, 0.41H, CH), 6.41 (s, 0.59H, CH), 6.72-6.89 (m, 2H, Ar), 6.98-7.14 (m, 3H, Ar), 7.22-7.37 (m, 5H, Ar), 7.42-7.46 (m, 2H, Ar), 7.59-7.73 (m, 1H, Ar);  $^{13}\text{C}$  NMR (100 MHz,  $\text{CDCl}_3$ ):  $\delta$  27.94, 27.98, 51.96, 52.19, 52.88, 53.09, 60.25, 60.48, 84.37, 84.45, 114.93, 115.14, 123.85, 124.06, 125.74, 126.99, 127.65, 127.70, 127.77, 127.83, 127.91, 128.07, 128.37, 128.61, 128.69, 128.96, 131.12, 131.20, 132.94, 133.28, 134.34, 135.87, 137.10, 138.08, 138.51, 139.07, 139.66, 140.00, 148.55, 148.61, 167.03, 167.82, 175.32, 175.83; IR (neat)  $\nu$  2927, 1793, 1762, 1735, 1491, 1368, 1287, 1148, 738  $\text{cm}^{-1}$ ; MS (ESI)  $m/z$  494.5 ( $\text{M}+\text{Na}^+$ , 100). HRMS (ESI) Calcd. for  $\text{C}_{30}\text{H}_{28}\text{ClNO}_5\text{Na}$  requires ( $\text{M}+\text{Na}^+$ ) 540.1563, Found: 540.1548.

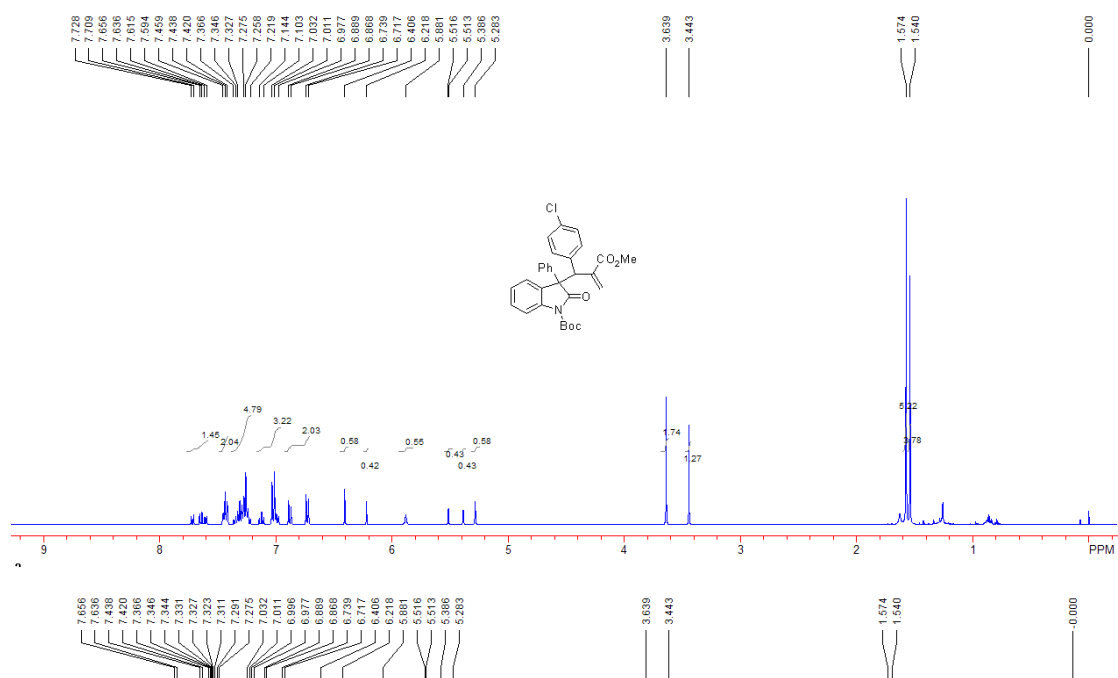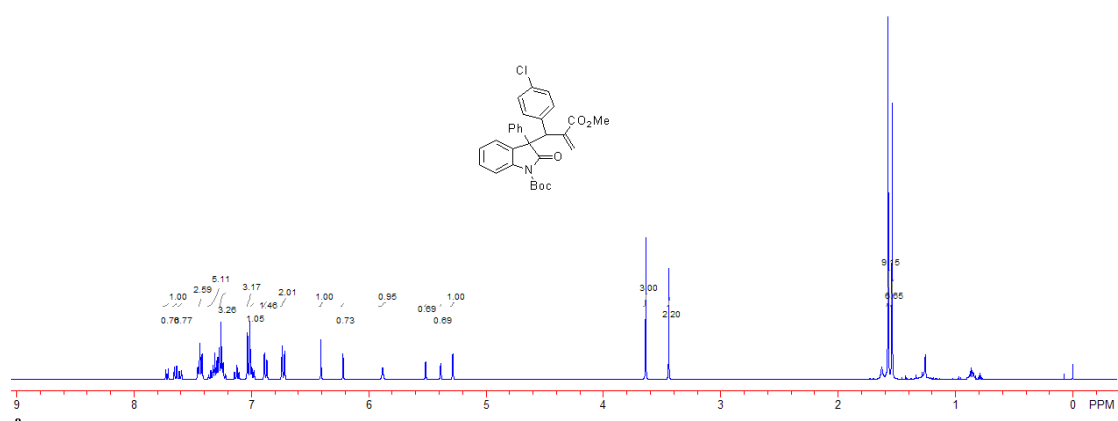

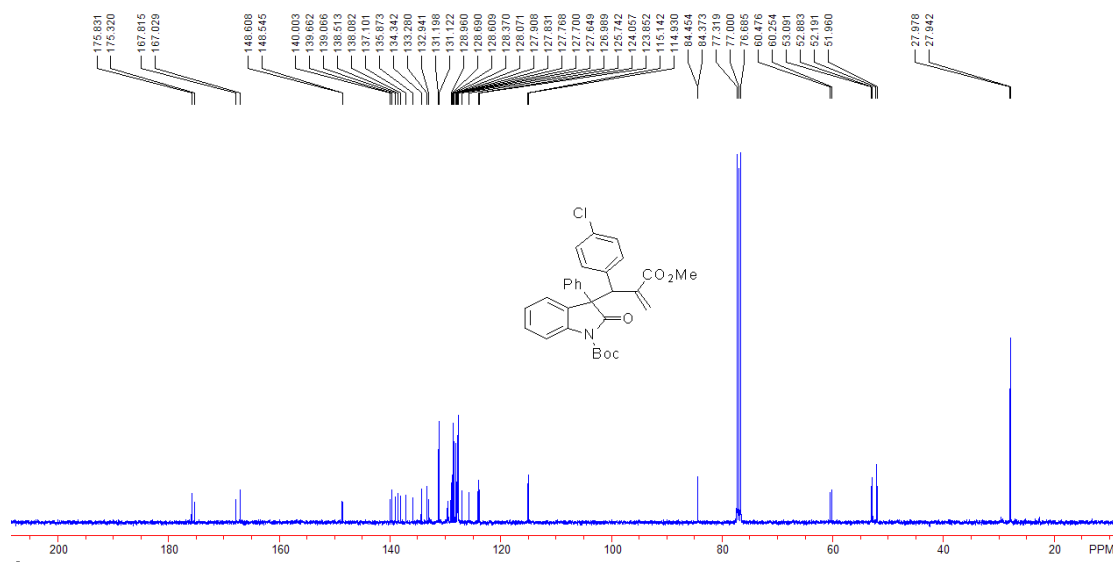

HPLC REPORT

Sample Name:jj-16-19-rac ad250 90.che  
Time:14:03  
column: ADH(V<sup>o</sup>)  
Velocity: 0.7

Date:2010-05-19  
Method:  
the mobile phase: 90/10  
the detection wavelength: 230

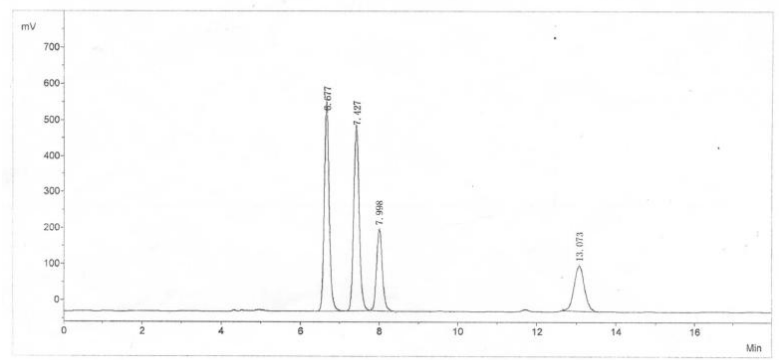

| No. | PeakNo | R. Time | PeakHeight | PeakArea  | PerCent |
|-----|--------|---------|------------|-----------|---------|
| 1   | 1      | 6.677   | 543457.5   | 4999209.2 | 34.5819 |
| 2   | 2      | 7.427   | 502362.5   | 4954883.8 | 34.2753 |
| 3   | 3      | 7.998   | 224095.2   | 2272195.6 | 15.7178 |
| 4   | 4      | 13.073  | 124201.2   | 2229860.6 | 15.4250 |

Total 1394116.4 14456149.2 100.0000

Chemical structure of compound 1j-16-19-rac: COC(=O)C(=C)C1(C(=O)N1Cc2ccccc2)C3=CC=C(C=C3)C4=CC=C(C=C4)Cl

AD-H, 90/10, 0.7 ml/min, 230 nm.

# HPLC REPORT

Sample Name:jj-16-19.che

Date:2010-05-19

Time:14:30

Method:

column:

the mobile phase:

Velocity:

the detection wavelength:

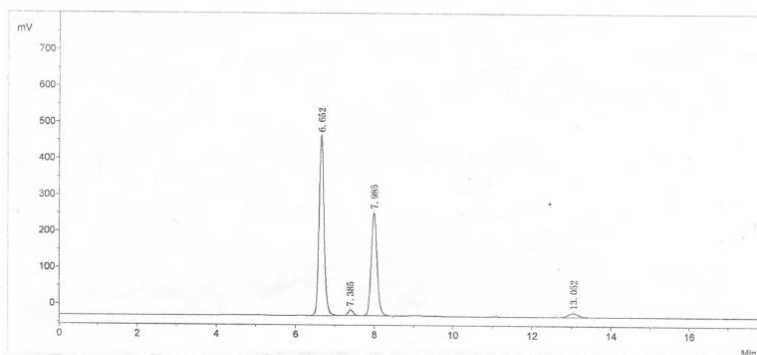

| No.   | PeakNo | R. Time  | PeakHeight | PeakArea  | PerCent  |
|-------|--------|----------|------------|-----------|----------|
| 1     | 1      | 6.652    | 491514.8   | 4365520.5 | 57.0260  |
| 2     | 2      | 7.385    | 15208.2    | 152197.3  | 1.9881   |
| 3     | 3      | 7.985    | 282625.9   | 2944119.2 | 38.4585  |
| 4     | 4      | 13.052   | 10735.2    | 193479.0  | 2.5274   |
| Total |        | 800084.1 | 7655316.0  |           | 100.0000 |

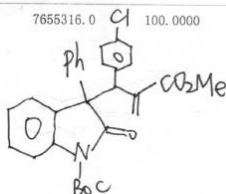

AD-H, 90/10, 0.7 ml/min, 230 nm.

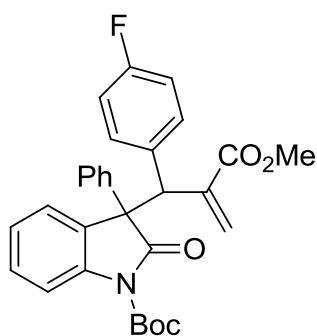

Tert-butyl

3-(1-(4-fluorophenyl)-2-(methoxycarbonyl)allyl)-2-oxo-3-phenylindoline-1-carboxylate **5e**

A white solid, this is a known compound.<sup>6</sup> 86% yield, 43 mg (*anti:syn* = 58:42);  $[\alpha]_D^{20} = -236.0$  (c 1.9, CHCl<sub>3</sub>) for 93% ee (*anti*) and 85% ee (*syn*); Enantiomeric excess was determined by HPLC with a Chiralcel OD-H column, Hexane/*i*PrOH = 99/1, 1.0 mL/min, 254 nm, for *anti* product  $t_{major} = 6.793$  min,  $t_{minor} = 35.273$  min; for *syn* product  $t_{major} = 8.958$  min,  $t_{minor} = 52.310$  min; <sup>1</sup>H NMR (400MHz, CDCl<sub>3</sub>, TMS)  $\delta$  1.54 (s, 3.78H, Boc), 1.57 (s, 5.22H,

Boc), 3.44 (s, 1.26H, CH<sub>3</sub>), 3.64 (s, 1.74H, CH<sub>3</sub>), 5.30 (s, 0.58H, =CH<sub>2</sub>), 5.40 (s, 0.42H, =CH<sub>2</sub>), 5.52 (d, *J* = 1.2 Hz, 0.42H, =CH<sub>2</sub>), 5.90 (s, 0.58H, =CH<sub>2</sub>), 6.21 (s, 0.42H, CH), 6.40 (s, 0.58H, CH), 6.71-6.79 (m, 3H, Ar), 6.88-7.14 (m, 2H, Ar), 7.22-7.36 (m, 5H, Ar), 7.42-7.47 (m, 2H, Ar), 7.61-7.72 (m, 1H, Ar).

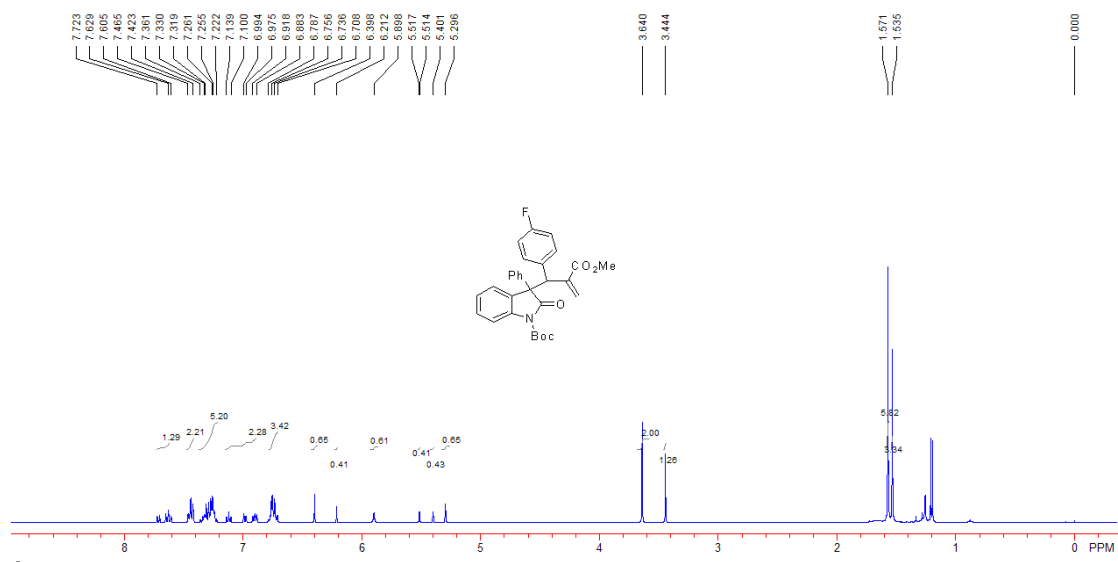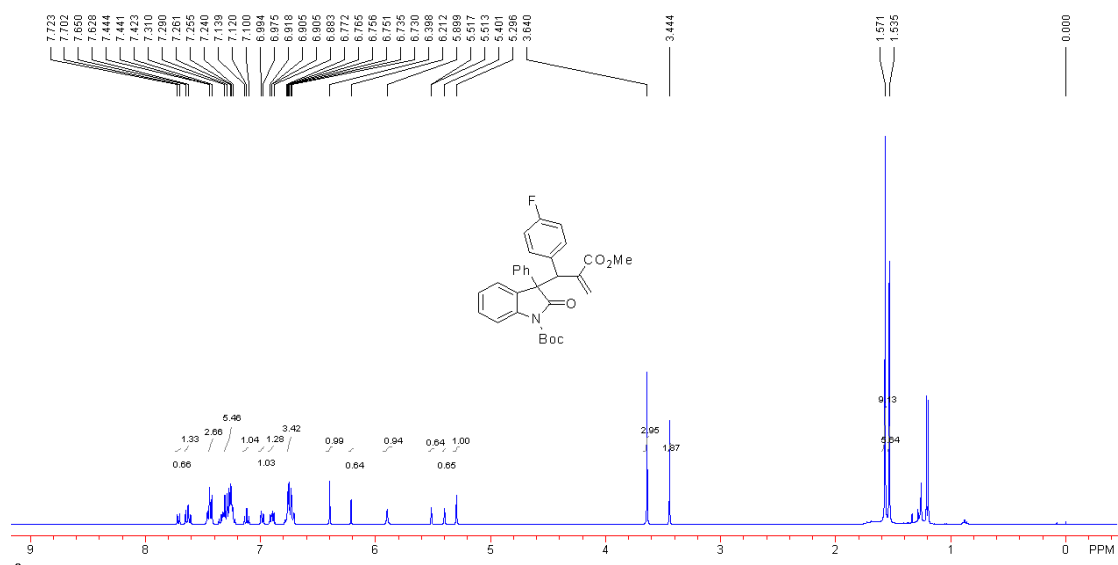

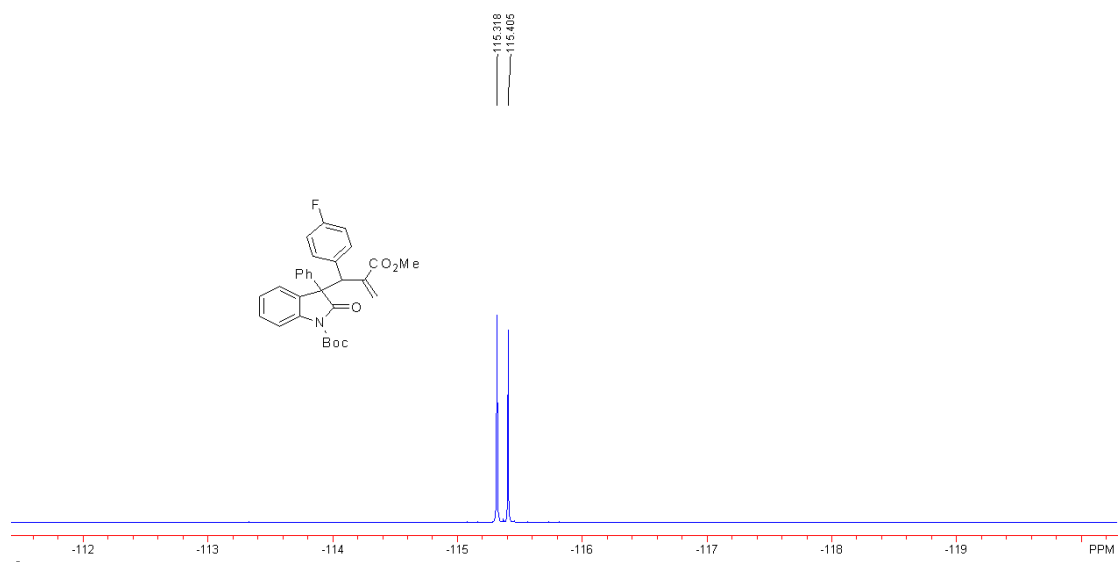

WH-500 色 谱 分 析 报 告

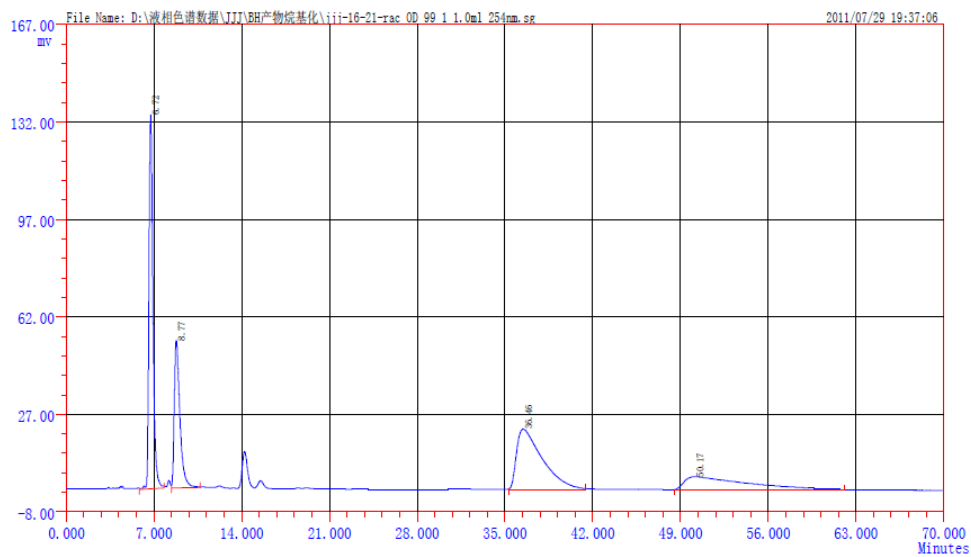

| ID         | 组分名 | 保留时间   | 峰高     | 峰面积       | 浓度       | 拖尾因子 | 理论塔板 |
|------------|-----|--------|--------|-----------|----------|------|------|
| 1          |     | 6.723  | 134396 | 3001215.1 | 32.0112  | 1.38 | 1807 |
| 2          |     | 8.773  | 52925  | 1636236.2 | 17.4522  | 1.80 | 1605 |
| 3          |     | 36.460 | 21603  | 3069048.0 | 32.7347  | 2.55 | 1313 |
| 4          |     | 50.167 | 4729   | 1669010.6 | 17.8018  | 4.42 | 403  |
| $\Sigma$ : |     |        | 213653 | 9375509.9 | 100.0000 |      |      |

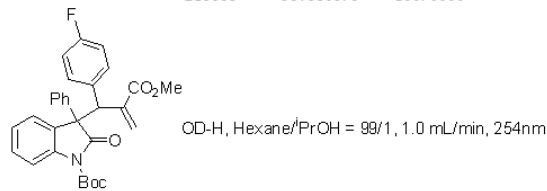

## WH-500 色谱分析报告

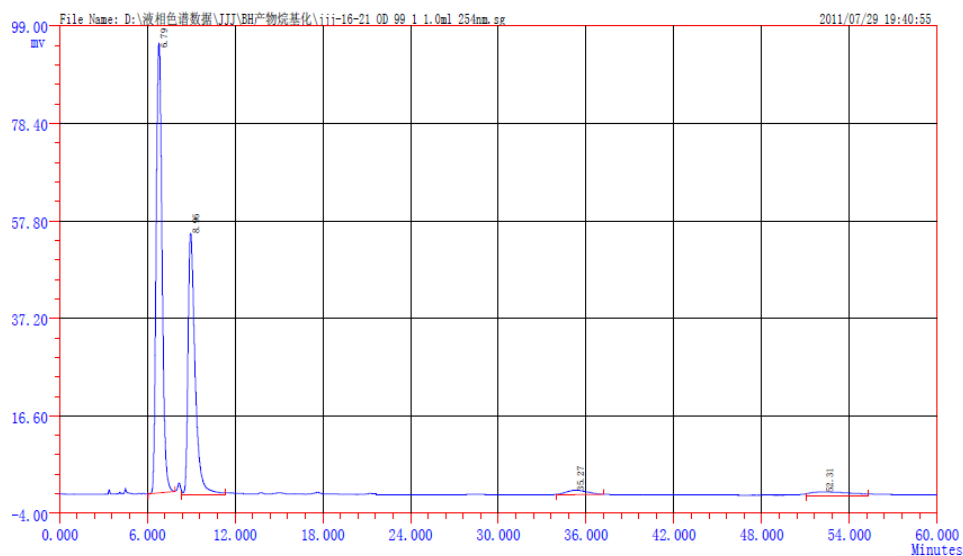

| ID         | 组分名 | 保留时间   | 峰高     | 峰面积       | 浓度       | 拖尾因子 | 理论塔板 |
|------------|-----|--------|--------|-----------|----------|------|------|
| 1          |     | 6.793  | 95021  | 2667696.1 | 56.0877  | 1.19 | 1167 |
| 2          |     | 8.958  | 55152  | 1849147.4 | 38.8779  | 1.66 | 1423 |
| 3          |     | 35.273 | 905    | 94013.3   | 1.9766   | 1.24 | 2298 |
| 4          |     | 52.310 | 742    | 145435.8  | 3.0578   | 1.70 | 1420 |
| $\Sigma$ : |     |        | 151820 | 4756292.5 | 100.0000 |      |      |

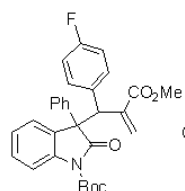

OD-H, Hexane/*i*PrOH = 99/1, 1.0 mL/min, 254nm

Enantiomeric excess was determined by HPLC with a Chiralcel OD-H column, Hexane/*i*PrOH = 99/1, 1.0 mL/min, 254 nm, for *anti* product  $t_{major} = 6.793$  min,  $t_{minor} = 35.273$  min; for *syn* product  $t_{major} = 8.958$  min,  $t_{minor} = 52.310$  min

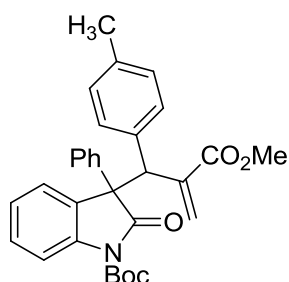

Tert-butyl 3-(2-(methoxycarbonyl)-1-(p-tolyl)allyl)-2-oxo-3-phenylindoline-1-carboxylate **5f**

A white solid, 81% yield, 39 mg, m.p. 82-84 °C, (*anti*:*syn* = 60:40);  $[\alpha]_D^{20} = -89.5$  (c 1.2, CHCl<sub>3</sub>) for 95% ee (*anti*) and 91% ee (*syn*); Enantiomeric excess was determined by HPLC with a Chiralcel IC-H column, Hexane/*i*PrOH = 90/10, 0.7 mL/min, 214 nm, for *anti* product  $t_{major} = 11.627$  min,  $t_{minor} = 25.043$  min; for *syn* product  $t_{major} = 15.877$  min,  $t_{minor} = 22.543$  min; <sup>1</sup>H NMR (300 MHz, CDCl<sub>3</sub>, TMS):  $\delta$  1.52 (s, 3.60H, Boc), 1.57 (s, 5.40H, Boc), 2.19 (s,

1.20H, CH<sub>3</sub>), 2.22 (s, 1.80H, CH<sub>3</sub>), 3.42 (s, 1.20H, CH<sub>3</sub>), 3.64 (s, 1.80H, CH<sub>3</sub>), 5.31 (s, 0.60H, =CH<sub>2</sub>), 5.38 (s, 0.40H, =CH<sub>2</sub>), 5.51 (s, 0.40H, =CH<sub>2</sub>), 5.79 (s, 0.60H, =CH<sub>2</sub>), 6.18 (s, 0.37H, CH), 6.38 (s, 0.63H, CH), 6.66-6.79 (m, 2H, Ar), 6.84-7.14 (m, 3H, Ar), 7.25-7.34 (m, 5H, Ar), 7.35-7.51 (m, 2H, Ar), 7.62-7.74 (m, 1H, Ar); <sup>13</sup>C NMR (CDCl<sub>3</sub>, 75 MHz): δ 20.97, 27.93, 27.99, 51.89, 52.15, 53.02, 53.51, 60.33, 60.57, 84.03, 84.17, 114.82, 115.06, 123.65, 123.84, 126.13, 127.24, 127.42, 127.55, 127.63, 127.86, 128.22, 128.46, 128.72, 129.60, 129.69, 132.44, 134.05, 136.54, 136.79, 137.27, 138.67, 138.84, 139.18, 140.18, 140.26, 148.74, 167.21, 168.24, 175.43, 176.05; IR (neat) ν 2981, 1759, 1724, 1463, 1345, 1287, 1146, 1098, 734, 697 cm<sup>-1</sup>; MS (ESI) *m/z* 520.2 (M+Na<sup>+</sup>, 100). HRMS (ESI) Calcd. for C<sub>31</sub>H<sub>31</sub>O<sub>5</sub>Na requires (M+Na<sup>+</sup>) 520.2202, Found: 520.2086.

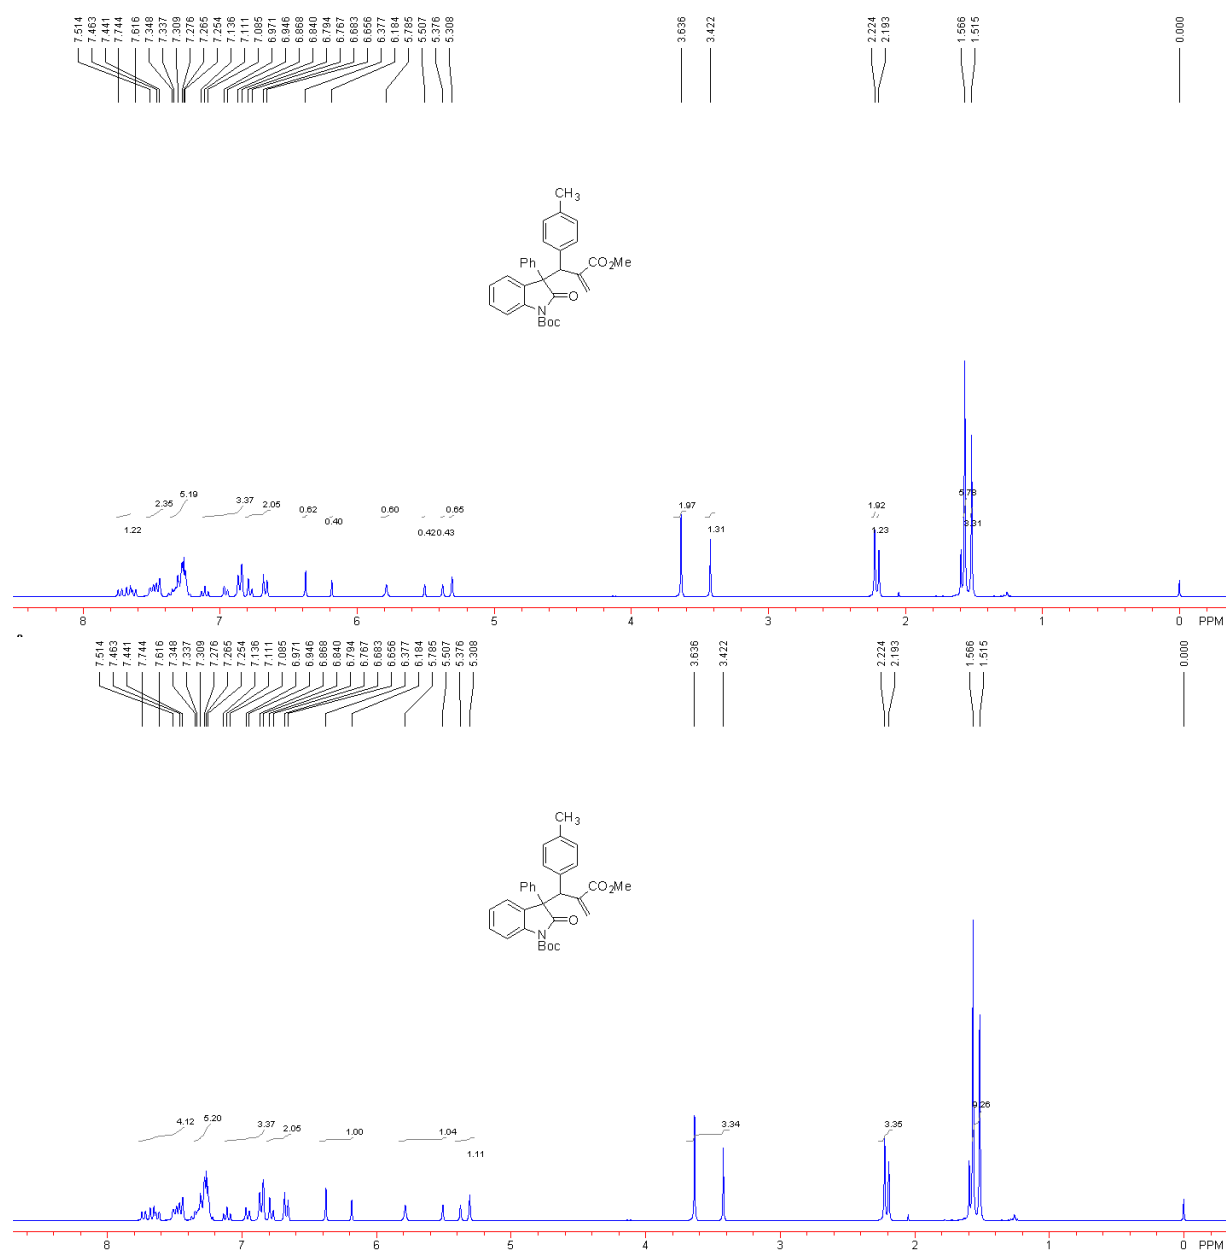

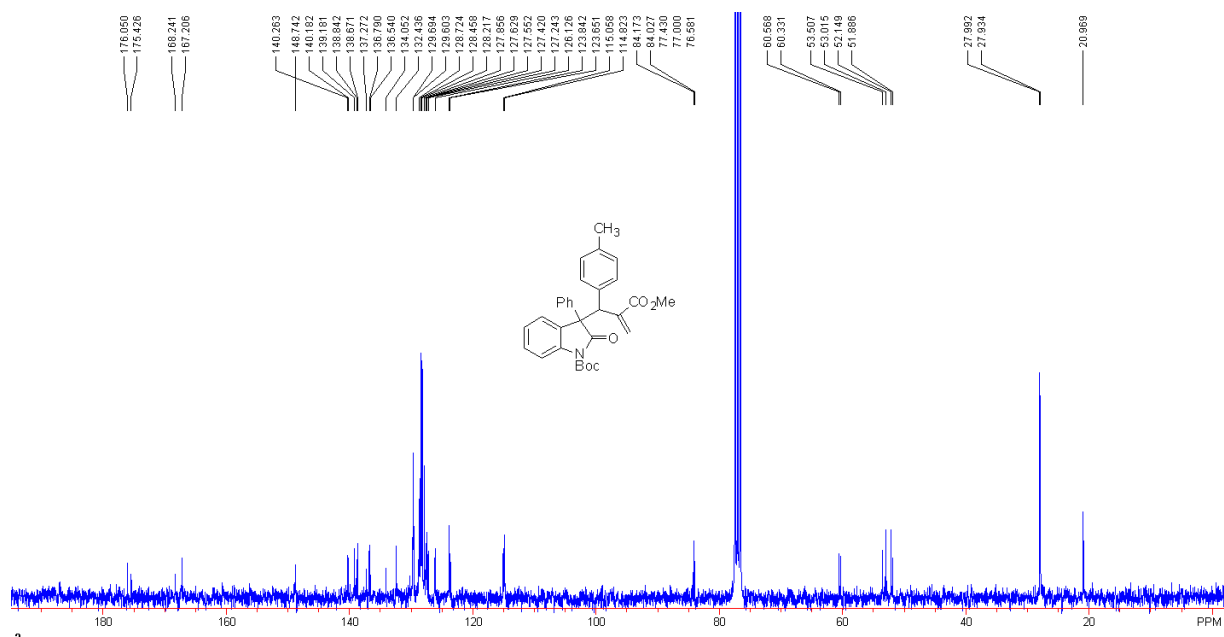

## HPLC REPORT

Sample Name: wd-9-85-rac-ic-9-1-0.7-214.che      Date: 2012-04-05  
Time: 09:41      Method:  
Column:      Flow Rate:  
Wave Length:      Mobile Phase:

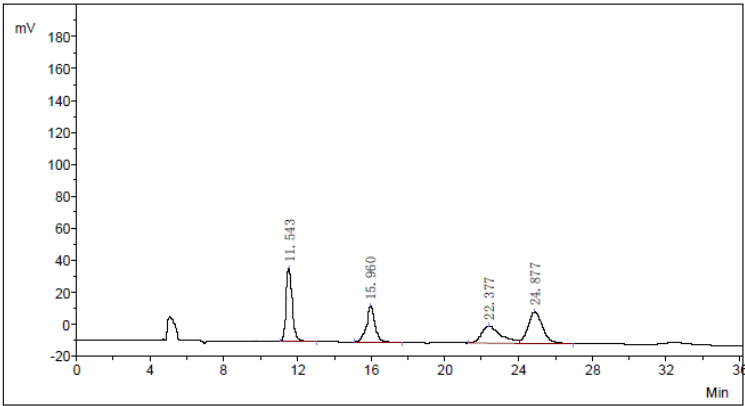

| No.   | PeakNo | ID. Name | R. Time | PeakHeight | PeakArea  | PerCent  |
|-------|--------|----------|---------|------------|-----------|----------|
| 1     | 1      | Unknown  | 11.543  | 45343.0    | 1064361.9 | 29.1625  |
| 2     | 2      | Unknown  | 15.960  | 22489.6    | 733796.2  | 20.1053  |
| 3     | 3      | Unknown  | 22.377  | 10783.5    | 781395.6  | 21.4095  |
| 4     | 4      | Unknown  | 24.877  | 19691.6    | 1070208.9 | 29.3227  |
| Total |        |          |         | 98307.7    | 3649762.6 | 100.0000 |

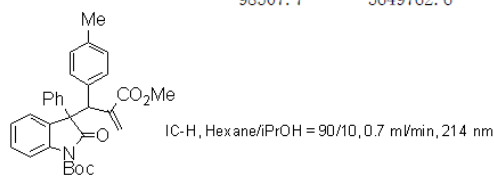

## HPLC REPORT

Sample Name: wd-9-85-chiral.che Date: 2012-04-05  
Time: 10:18 Method:  
Column: Flow Rate:  
Wave Length: Mobile Phase:

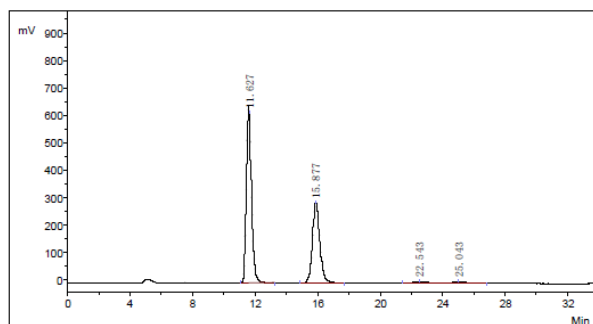

| No.   | PeakNo | ID. Name | R. Time | PeakHeight | PeakArea   | PerCent  |
|-------|--------|----------|---------|------------|------------|----------|
| 1     | 1      | Unknown  | 11.627  | 618571.0   | 14727940.9 | 58.7947  |
| 2     | 2      | Unknown  | 15.877  | 291572.9   | 9527367.0  | 38.0337  |
| 3     | 3      | Unknown  | 22.543  | 5898.0     | 425616.2   | 1.6991   |
| 4     | 4      | Unknown  | 25.043  | 6737.6     | 368857.5   | 1.4725   |
| Total |        |          |         | 922779.3   | 25049781.6 | 100.0000 |

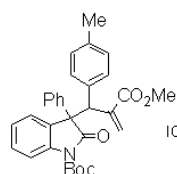

IC-H, Hexane/*i*PrOH = 90/10, 0.7 mL/min, 214 nm

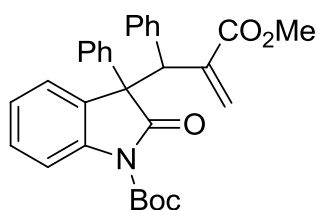

Tert-butyl 3-(2-(methoxycarbonyl)-1-phenylallyl)-2-oxo-3-phenylindoline-1-carboxylate **5g**

A white solid, this is a known compound.<sup>6</sup> 89% yield, 42 mg (*anti:syn* = 57:43);  $[\alpha]_D^{20}$  = -196.0 (c 0.1, CHCl<sub>3</sub>) for 93% ee (*anti*) and 89% ee (*syn*); Enantiomeric excess was determined by HPLC with a Chiralcel OD-H column, Hexane/*i*PrOH = 95/5, 0.9 mL/min, 254 nm, for *anti* product  $t_{major}$  = 6.295 min,  $t_{minor}$  = 12.578 min; for *syn* product  $t_{major}$  = 8.940 min,  $t_{minor}$  = 18.340 min; <sup>1</sup>H NMR (400 MHz, CDCl<sub>3</sub>, TMS):  $\delta$  1.52 (s, 3.87H, Boc), 1.57 (s, 5.13H, Boc), 3.43 (s, 1.29H, CH<sub>3</sub>), 3.63 (s, 1.71H, CH<sub>3</sub>), 5.34 (s, 0.57H, =CH<sub>2</sub>), 5.42 (s, 0.43H, =CH<sub>2</sub>), 5.53 (d, *J* = 0.8 Hz, 0.43H, =CH<sub>2</sub>), 5.85 (s, 0.57H, =CH<sub>2</sub>), 6.22 (s, 0.43H, CH), 6.40 (s,

0.57H, CH), 6.79-6.92 (m, 2H, Ar), 6.95-7.12 (m, 4H, Ar), 7.24-7.33 (m, 5H, Ar), 7.44-7.50 (m, 2H, Ar), 7.61-7.72 (m, 1H, Ar).

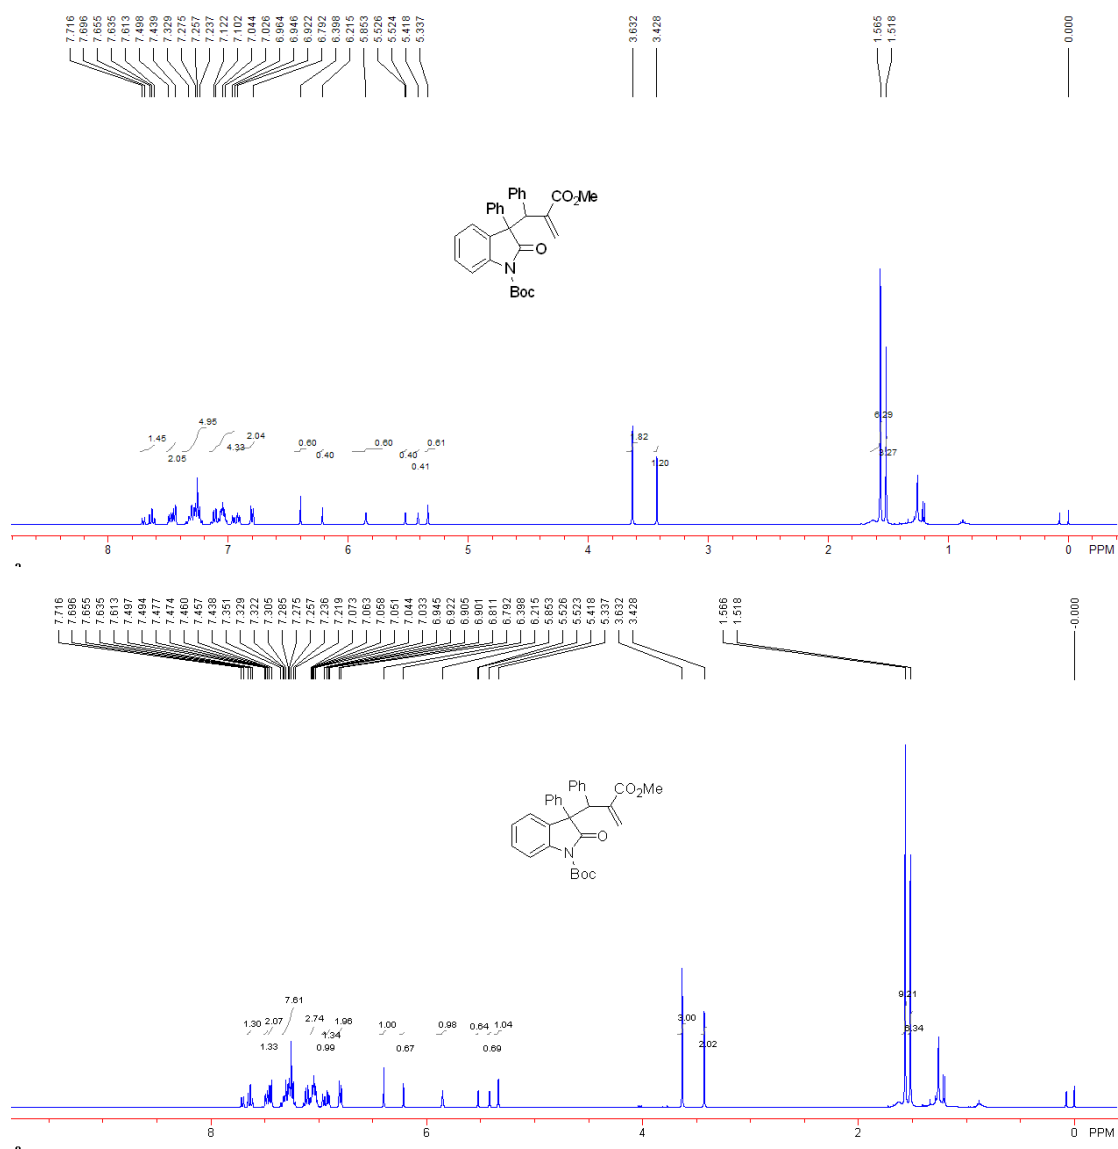

WH-500 色 谱 分 析 报 告

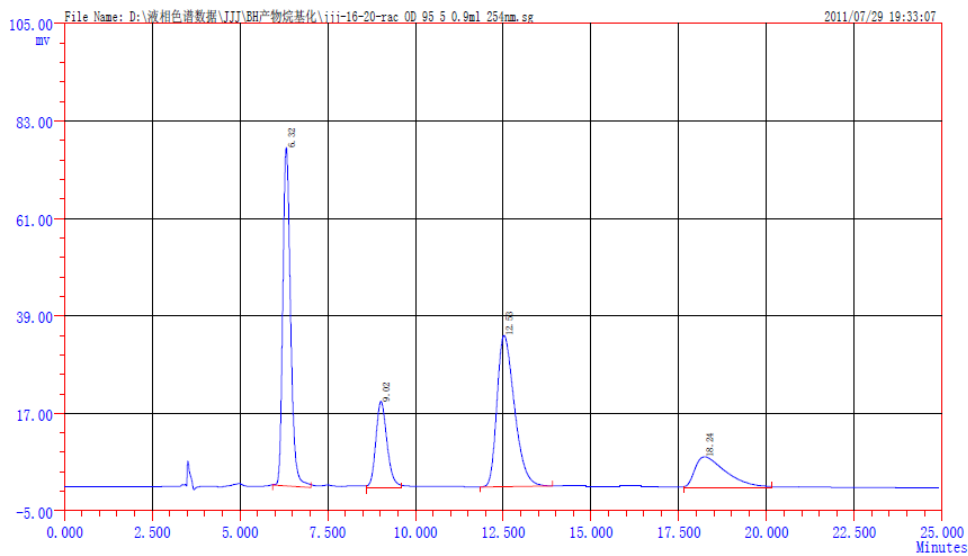

| ID | 组分名 | 保留时间   | 峰高     | 峰面积       | 浓度       | 拖尾因子 | 理论塔板 |
|----|-----|--------|--------|-----------|----------|------|------|
| 1  |     | 6.320  | 76344  | 1179214.7 | 36.5696  | 1.23 | 3337 |
| 2  |     | 9.017  | 19584  | 441699.6  | 13.6979  | 1.24 | 3185 |
| 3  |     | 12.525 | 34142  | 1179442.9 | 36.5767  | 1.41 | 2620 |
| 4  |     | 18.242 | 6926   | 424217.5  | 13.1558  | 2.04 | 1768 |
| Σ: |     |        | 136996 | 3224574.6 | 100.0000 |      |      |

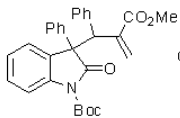

OD-H, Hexane/PrOH = 95/5, 0.9 mL/min, 254nm

## WH-500 色谱分析报告

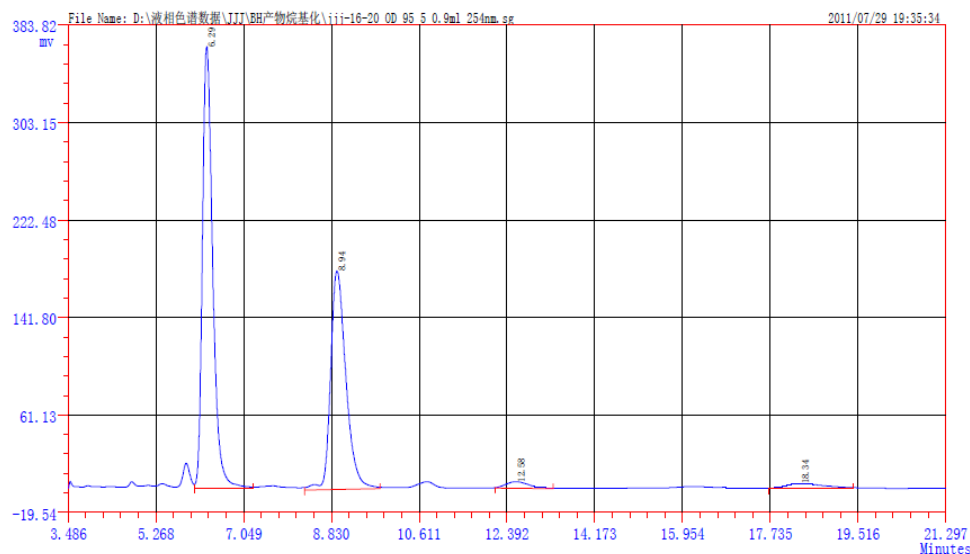

| ID         | 组分名 | 保留时间   | 峰高     | 峰面积       | 浓度       | 拖尾因子 | 理论塔板 |
|------------|-----|--------|--------|-----------|----------|------|------|
| 1          |     | 6.295  | 365651 | 5316050.0 | 55.0017  | 1.38 | 3737 |
| 2          |     | 8.940  | 180774 | 3936893.5 | 40.7325  | 1.39 | 3359 |
| 3          |     | 12.578 | 5394   | 181858.0  | 1.8816   | 1.26 | 2774 |
| 4          |     | 18.340 | 4067   | 230448.4  | 2.3843   | 1.35 | 2088 |
| $\Sigma$ : |     |        | 555886 | 9665249.8 | 100.0000 |      |      |

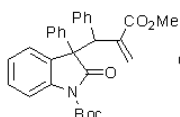

OD-H, Hexane/*i*PrOH = 95/5, 0.9 mL/min, 254nm

Enantiomeric excess was determined by HPLC with a Chiralcel OD-H column, Hexane/*i*PrOH = 95/5, 0.9 mL/min, 254 nm, for *anti* product  $t_{major} = 6.295$  min,  $t_{minor} = 12.578$  min; for *syn* product  $t_{major} = 8.940$  min,  $t_{minor} = 18.340$  min

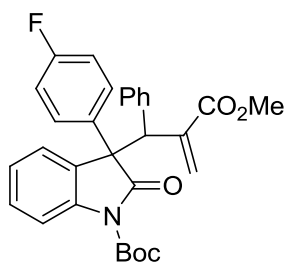

Tert-butyl

3-(4-fluorophenyl)-3-(2-(methoxycarbonyl)-1-phenylallyl)-2-oxoindoline-1-carboxylate **5h**

A white solid, this is a known compound.<sup>6</sup> 82% yield, 41 mg (*anti:syn* = 60:40);  $[\alpha]_D^{20} = -147.7$  (c 1.1, CHCl<sub>3</sub>) for 92% ee (*anti*) and 89% ee (*syn*); Enantiomeric excess was determined by HPLC with a Chiralcel AD-H column, Hexane/*i*PrOH = 95/5, 1.0 mL/min, 254 nm, for *anti* product  $t_{major} = 5.468$  min,  $t_{minor} = 7.813$  min; for *syn* product  $t_{major} = 5.998$  min,

$t_{minor} = 8.328$  min;  $^1\text{H}$  NMR (400 MHz,  $\text{CDCl}_3$ , TMS):  $\delta$  1.52 (s, 3.38H, Boc), 1.57 (s, 5.62H, Boc), 3.46 (s, 1.20H,  $\text{CH}_3$ ), 3.64 (s, 1.80H,  $\text{CH}_3$ ), 5.30 (s, 0.60H,  $=\text{CH}_2$ ), 5.35 (s, 0.40H,  $=\text{CH}_2$ ), 5.52 (s, 0.40H,  $=\text{CH}_2$ ), 5.72 (s, 0.60H,  $=\text{CH}_2$ ), 6.22 (s, 0.40H, CH), 6.39 (s, 0.60H, CH), 6.78-6.89 (m, 3H, Ar), 6.94-7.14 (m, 5H, Ar), 7.25-7.37 (m, 2H, Ar), 7.41-7.49 (m, 2H, Ar), 7.59-7.73 (m, 1H, Ar).

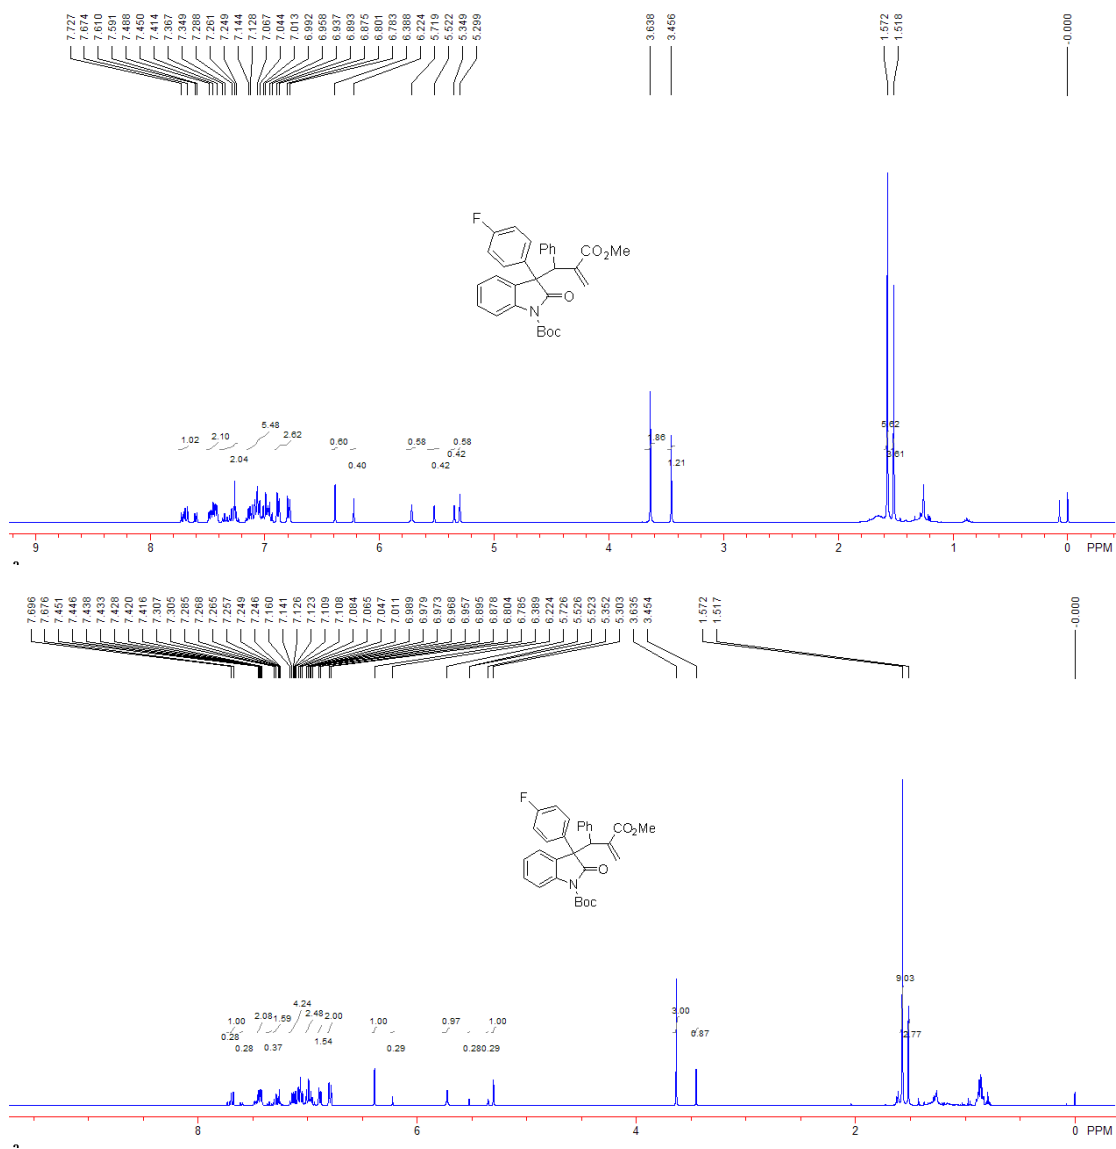

WH-500 色 谱 分 析 报 告

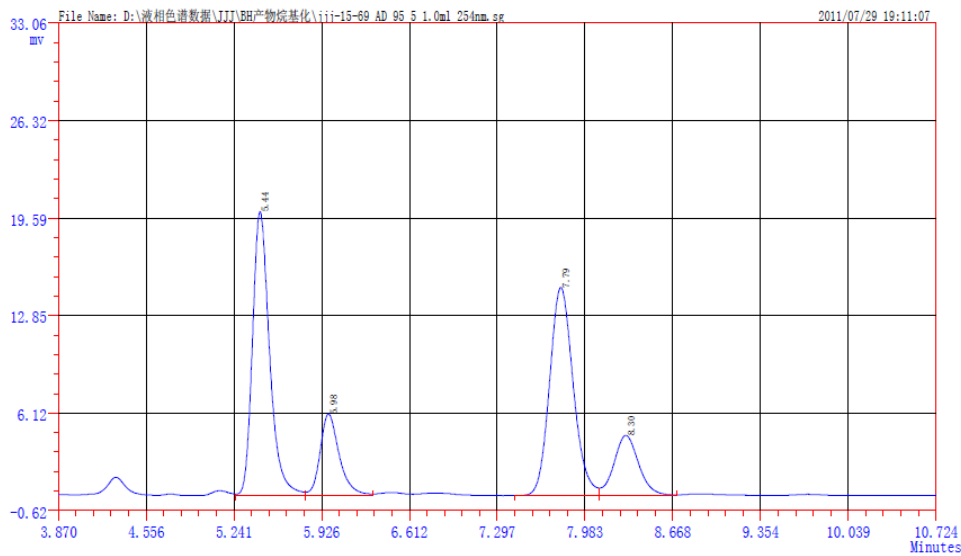

| ID | 组分名 | 保留时间  | 峰高    | 峰面积      | 浓度       | 拖尾因子 | 理论塔板 |
|----|-----|-------|-------|----------|----------|------|------|
| 1  |     | 5.443 | 19629 | 182816.7 | 37.8243  | 1.32 | 6808 |
| 2  |     | 5.978 | 5647  | 59227.4  | 12.2540  | 1.27 | 6476 |
| 3  |     | 7.793 | 14395 | 185007.4 | 38.2775  | 1.17 | 7329 |
| 4  |     | 8.302 | 4170  | 56280.5  | 11.6443  | 1.14 | 7541 |
| Σ: |     |       | 43841 | 483331.9 | 100.0000 |      |      |

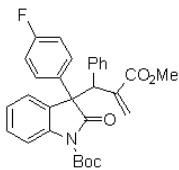

AD-H, Hexane/iPrOH = 95/5, 1.0 mL/min, 254nm

## WH-500 色谱分析报告

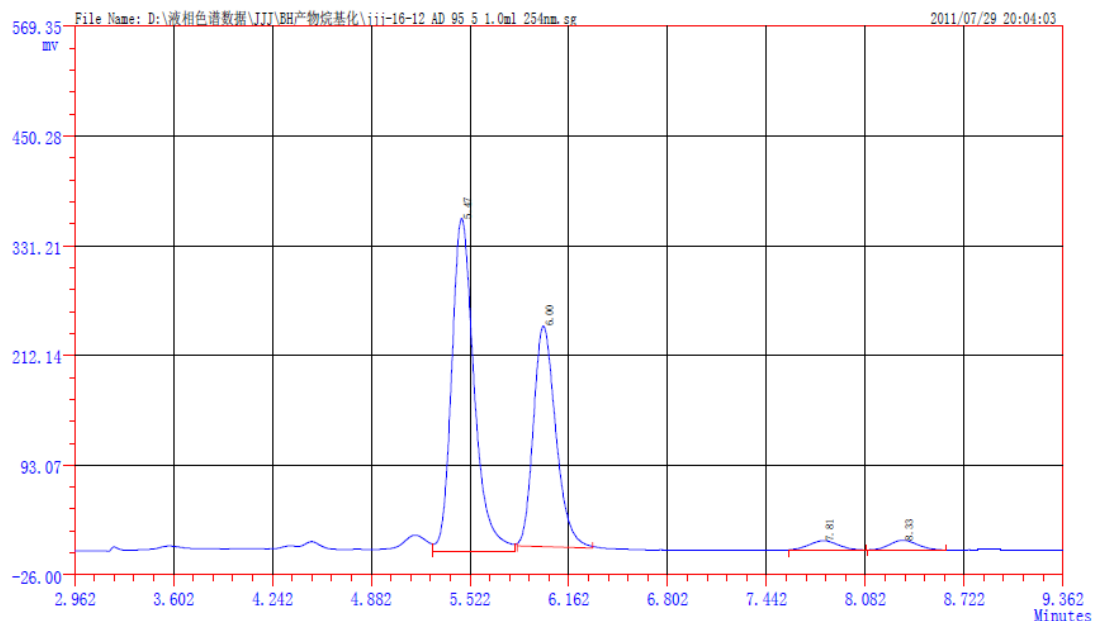

| ID | 组分名 | 保留时间  | 峰高     | 峰面积       | 浓度      | 拖尾因子 | 理论塔板 |
|----|-----|-------|--------|-----------|---------|------|------|
| 1  |     | 5.468 | 361279 | 3655820.7 | 57.3072 | 1.31 | 5820 |
| 2  |     | 5.998 | 239439 | 2425689.4 | 38.0241 | 1.23 | 6987 |
| 3  |     | 7.813 | 10632  | 150569.4  | 2.3603  | 1.10 | 6067 |
| 4  |     | 8.328 | 11033  | 147263.5  | 2.3084  | 1.07 | 7760 |

Σ:

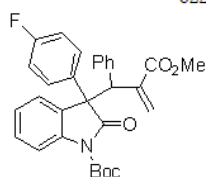

AD-H, Hexane/*i*PrOH = 95/5, 1.0 mL/min, 254nm

Enantiomeric excess was determined by HPLC with a Chiralcel AD-H column, Hexane/*i*PrOH = 95/5, 1.0 mL/min, 254 nm, for *anti* product  $t_{major} = 5.468$  min,  $t_{minor} = 7.813$  min; for *syn* product  $t_{major} = 5.998$  min,  $t_{minor} = 8.328$  min

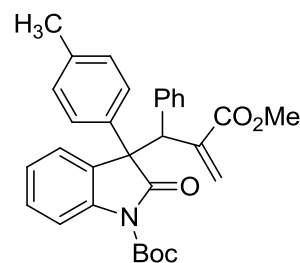

Tert-butyl 3-(2-(methoxycarbonyl)-1-phenylallyl)-2-oxo-3-(p-tolyl)indoline-1-carboxylate **5i**

A white solid, this is a known compound.<sup>6</sup> 76% yield, 38 mg (*anti:syn* = 61:39);  $[\alpha]_D^{20} = -177.8$  (c 1.85, CHCl<sub>3</sub>) for 92% ee (*anti*) and 88% ee (*syn*); Enantiomeric excess was determined by HPLC with a Chiralcel AD-H column, Hexane/*i*PrOH = 95/5, 0.8 mL/min, 254

nm, for *anti* product  $t_{major} = 6.902$  min,  $t_{minor} = 8.437$  min; for *syn* product  $t_{major} = 7.322$  min,  $t_{minor} = 18.025$  min;  $^1\text{H}$  NMR (400 MHz,  $\text{CDCl}_3$ , TMS):  $\delta$  1.51 (s, 3.51H, Boc), 1.56 (s, 5.49H, Boc), 2.29 (s, 1.13H,  $\text{CH}_3$ ), 2.31 (s, 1.87H,  $\text{CH}_3$ ), 3.43 (s, 1.17H,  $\text{CH}_3$ ), 3.63 (s, 1.83H,  $\text{CH}_3$ ), 5.31 (s, 0.61H,  $=\text{CH}_2$ ), 5.39 (s, 0.39H,  $=\text{CH}_2$ ), 5.54 (d,  $J = 1.2$  Hz, 0.39H,  $=\text{CH}_2$ ), 5.86 (s, 0.61H,  $=\text{CH}_2$ ), 6.22 (s, 0.39H, CH), 6.40 (s, 0.61H, CH), 6.81 (d,  $J = 7.2$  Hz, 1H, Ar), 6.92 (t,  $J = 8.4$  Hz, 1H, Ar), 7.01-7.14 (m, 6H, Ar), 7.22-7.36 (m, 4H, Ar), 7.60-7.71 (m, 1H, Ar).

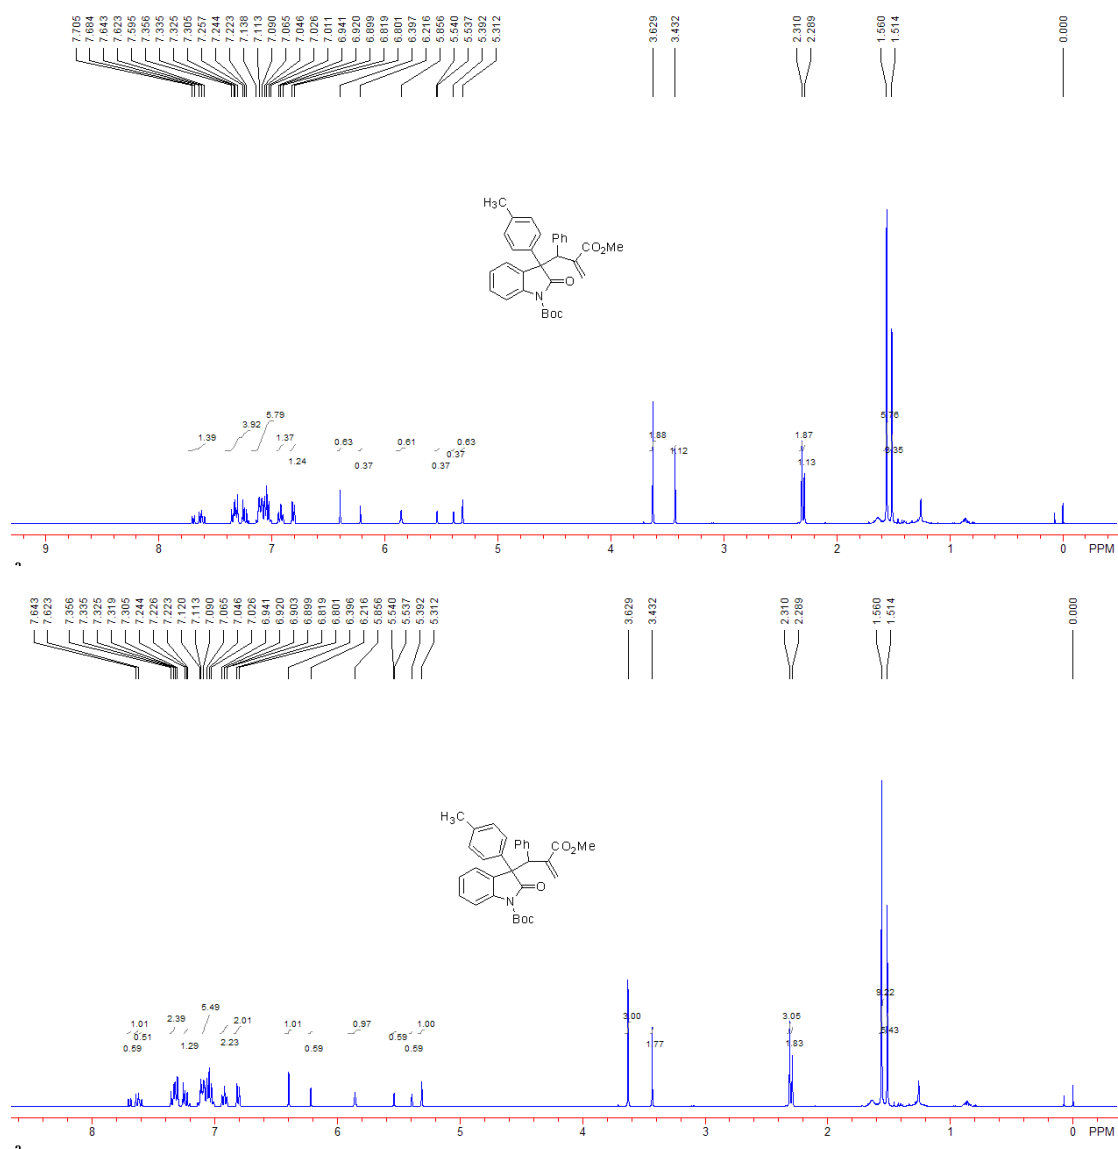

WH-500 色谱分析报告

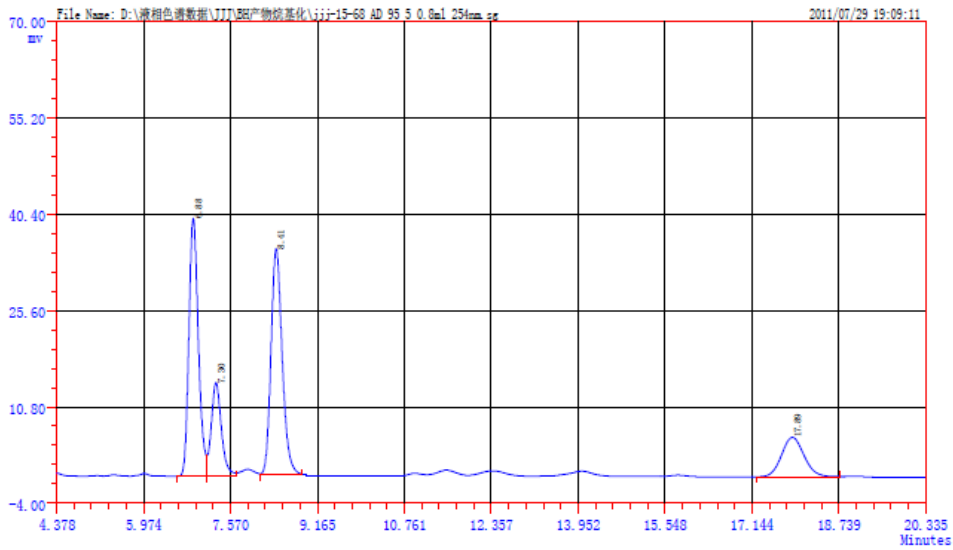

| ID | 组分名 | 保留时间   | 峰高    | 峰面积       | 浓度       | 拖尾因子 | 理论塔板 |
|----|-----|--------|-------|-----------|----------|------|------|
| 1  |     | 6.882  | 39545 | 479921.8  | 35.9022  | 1.23 | 6408 |
| 2  |     | 7.300  | 14356 | 186815.4  | 13.9754  | 1.34 | 6272 |
| 3  |     | 8.405  | 34694 | 497650.4  | 37.2285  | 1.21 | 6843 |
| 4  |     | 17.888 | 6030  | 172358.4  | 12.8939  | 1.10 | 7806 |
| Σ: |     |        | 94625 | 1336745.9 | 100.0000 |      |      |

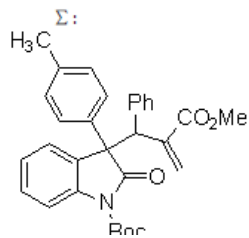

AD-H, Hexane/iPrOH = 95/5, 0.8 mL/min, 254nm

## WH-500 色谱分析报告

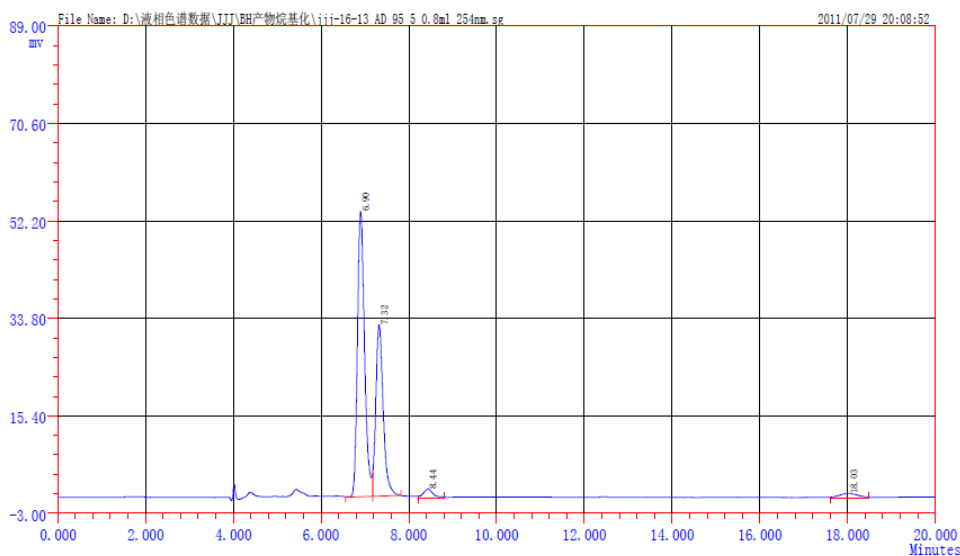

| ID | 组分名 | 保留时间   | 峰高    | 峰面积      | 浓度      | 拖尾因子 | 理论塔板 |
|----|-----|--------|-------|----------|---------|------|------|
| 1  |     | 6.902  | 53925 | 609277.0 | 58.6916 | 1.38 | 7437 |
| 2  |     | 7.322  | 32395 | 378913.2 | 36.5007 | 1.42 | 7809 |
| 3  |     | 8.437  | 1672  | 25909.0  | 2.4958  | 1.33 | 5908 |
| 4  |     | 18.025 | 826   | 23999.8  | 2.3119  | 1.04 | 7670 |

Σ:

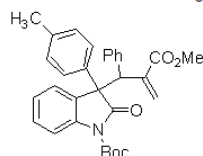

AD-H, Hexane/*i*PrOH = 95/5, 0.8 mL/min, 254nm

Enantiomeric excess was determined by HPLC with a Chiralcel AD-H column, Hexane/*i*PrOH = 95/5, 0.8 mL/min, 254 nm, for *anti* product  $t_{major} = 6.902$  min,  $t_{minor} = 8.437$  min; for *syn* product  $t_{major} = 7.322$  min,  $t_{minor} = 18.025$  min

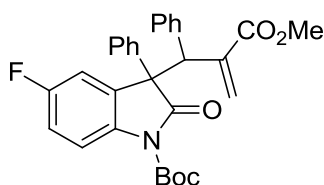

Tert-butyl

5-fluoro-3-(2-(methoxycarbonyl)-1-phenylallyl)-2-oxo-3-phenylindoline-1-carboxylate **5j**

A white solid, this is a known compound.<sup>6</sup> 82% yield, 41 mg (*anti:syn* = 56:44);  $[\alpha]_D^{20} = -155.0$  (c 0.25, CHCl<sub>3</sub>) for 97% ee (*anti*) and 84% ee (*syn*); Enantiomeric excess was determined by HPLC with a Chiralcel OD-H column, Hexane/*i*PrOH = 95/5, 0.9 mL/min, 254 nm, for *anti* product  $t_{major} = 5.585$  min,  $t_{minor} = 12.665$  min; for *syn* product  $t_{major} = 6.605$  min,  $t_{minor} = 9.740$  min; <sup>1</sup>H NMR (400 MHz, CDCl<sub>3</sub>, TMS): δ 1.52 (s, 3.96H, Boc), 1.56 (s, 5.04H, Boc), 3.44 (s, 1.32H, CH<sub>3</sub>), 3.64 (s, 1.68H, CH<sub>3</sub>), 5.31 (s, 0.56H, =CH<sub>2</sub>), 5.41 (s, 0.44H, =CH<sub>2</sub>).

=CH<sub>2</sub>), 5.49 (d, *J* = 1.6 Hz, 0.44H, =CH<sub>2</sub>), 5.87 (s, 0.56H, =CH<sub>2</sub>), 6.23 (s, 0.44H, CH), 6.41 (s, 0.56H, CH), 6.67-6.83 (m, 2H, Ar), 6.91-6.96 (m, 1H, Ar), 7.04-7.12 (m, 3H, Ar), 7.28-7.38 (m, 4H, Ar), 7.41-7.47 (m, 2H, Ar), 7.62-7.72 (m, 1H, Ar).

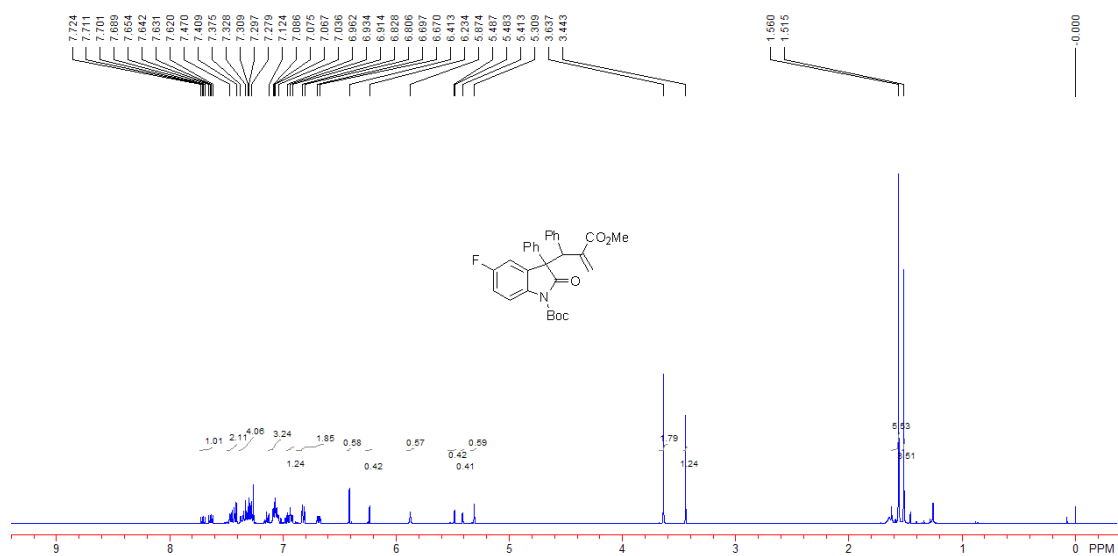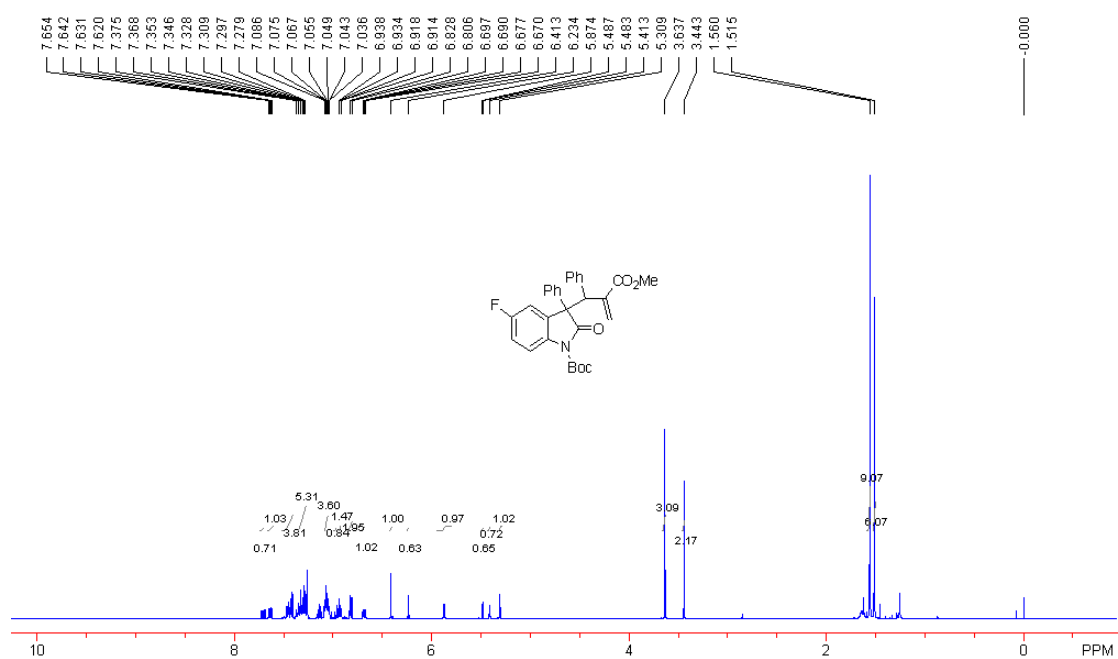

WH-500 色 谱 分 析 报 告

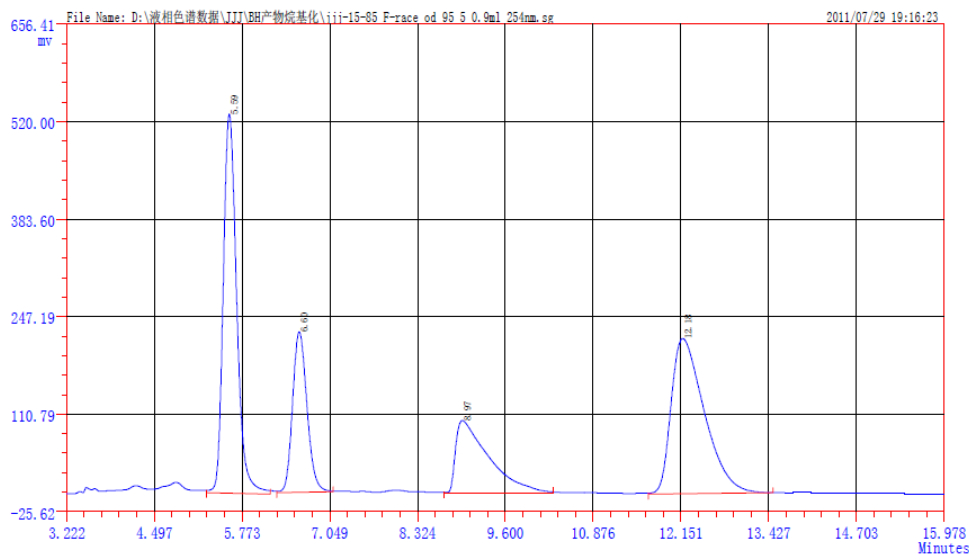

| ID | 组分名 | 保留时间   | 峰高      | 峰面积        | 浓度       | 拖尾因子 | 理论塔板 |
|----|-----|--------|---------|------------|----------|------|------|
| 1  |     | 5.587  | 530705  | 7208392.5  | 34.0744  | 1.24 | 3372 |
| 2  |     | 6.603  | 224695  | 3289147.0  | 15.5480  | 1.18 | 4056 |
| 3  |     | 8.973  | 101129  | 3376935.5  | 15.9629  | 3.60 | 1439 |
| 4  |     | 12.183 | 217090  | 7280374.5  | 34.4147  | 1.67 | 2630 |
| Σ: |     |        | 1073619 | 21154849.6 | 100.0000 |      |      |

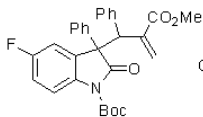

OD-H, Hexane/PrOH = 95/5, 0.9 mL/min, 254nm

WH-500 色 谱 分 析 报 告

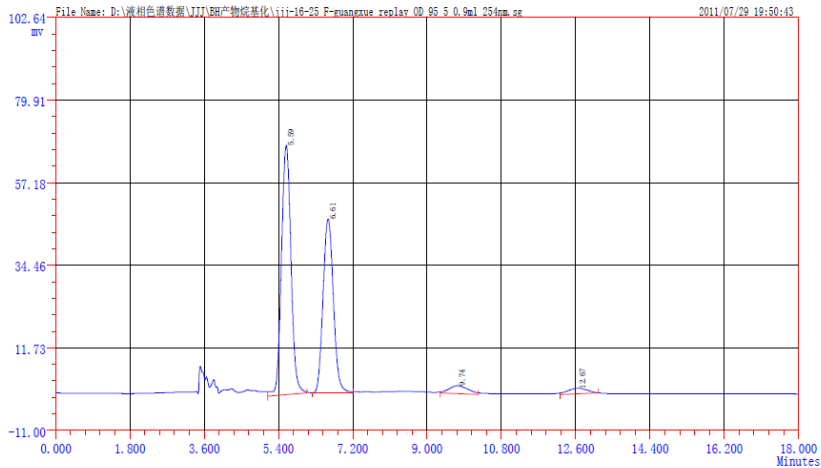

| ID | 组分名 | 保留时间   | 峰高     | 峰面积       | 浓度       | 拖尾因子 | 理论塔板 |
|----|-----|--------|--------|-----------|----------|------|------|
| 1  |     | 5.585  | 68599  | 1108391.1 | 53.6901  | 1.09 | 2381 |
| 2  |     | 6.605  | 47884  | 834428.4  | 40.4194  | 1.09 | 2863 |
| 3  |     | 9.740  | 2198   | 71164.9   | 3.4472   | 1.09 | 1804 |
| 4  |     | 12.665 | 1519   | 50439.9   | 2.4433   | 1.05 | 2899 |
| Σ: |     |        | 120200 | 2064424.3 | 100.0000 |      |      |

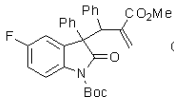

OD-H, Hexane/PrOH = 95/5, 0.9 mL/min, 254nm

Enantiomeric excess was determined by HPLC with a Chiralcel OD-H column, Hexane/*i*PrOH = 95/5, 0.9 mL/min, 254 nm, for *anti* product  $t_{\text{major}} = 5.585$  min,  $t_{\text{minor}} = 12.665$  min; for *syn* product  $t_{\text{major}} = 6.605$  min,  $t_{\text{minor}} = 9.740$  min

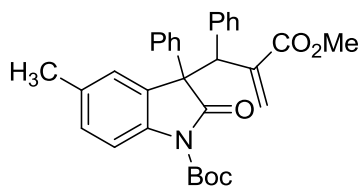

## Tert-butyl

### 3-(2-(methoxycarbonyl)-1-phenylallyl)-5-methyl-2-oxo-3-phenylindoline-1-carboxylate 5k

A colorless oil, this is a known compound.<sup>6</sup> 78% yield, 38 mg (*anti*:*syn* = 64:36);  $[\alpha]_{\text{D}}^{20} = -32.7$  (c 0.25, CHCl<sub>3</sub>) for 96% ee (*anti*) and 94% ee (*syn*); Enantiomeric excess was determined by HPLC with a Chiralcel AD-H column, Hexane/*i*PrOH = 95/5, 1.0 mL/min, 254 nm, for *anti* product  $t_{\text{major}} = 7.887$  min,  $t_{\text{minor}} = 11.732$  min; for *syn* product  $t_{\text{major}} = 9.095$  min,  $t_{\text{minor}} = 13.745$  min; <sup>1</sup>H NMR (400 MHz, CDCl<sub>3</sub>, TMS):  $\delta$  1.51 (s, 3.24H, Boc), 1.55 (s, 5.78H, Boc), 2.29 (s, 1.92H, CH<sub>3</sub>), 2.42 (s, 1.08H, CH<sub>3</sub>), 3.44 (s, 1.08H, CH<sub>3</sub>), 3.64 (s, 1.92H, CH<sub>3</sub>), 5.31 (s, 0.64H, =CH<sub>2</sub>), 5.40 (s, 0.36H, =CH<sub>2</sub>), 5.53 (d,  $J = 1.2$  Hz, 0.36H, =CH<sub>2</sub>), 5.90 (s, 0.64H, =CH<sub>2</sub>), 6.22 (s, 0.36H, CH), 6.40 (s, 0.64H, CH), 6.73-6.93 (m, 2H, Ar), 7.03-7.14 (m, 4H, Ar), 7.24-7.33 (m, 4H, Ar), 7.40-7.59 (m, 3H, Ar).

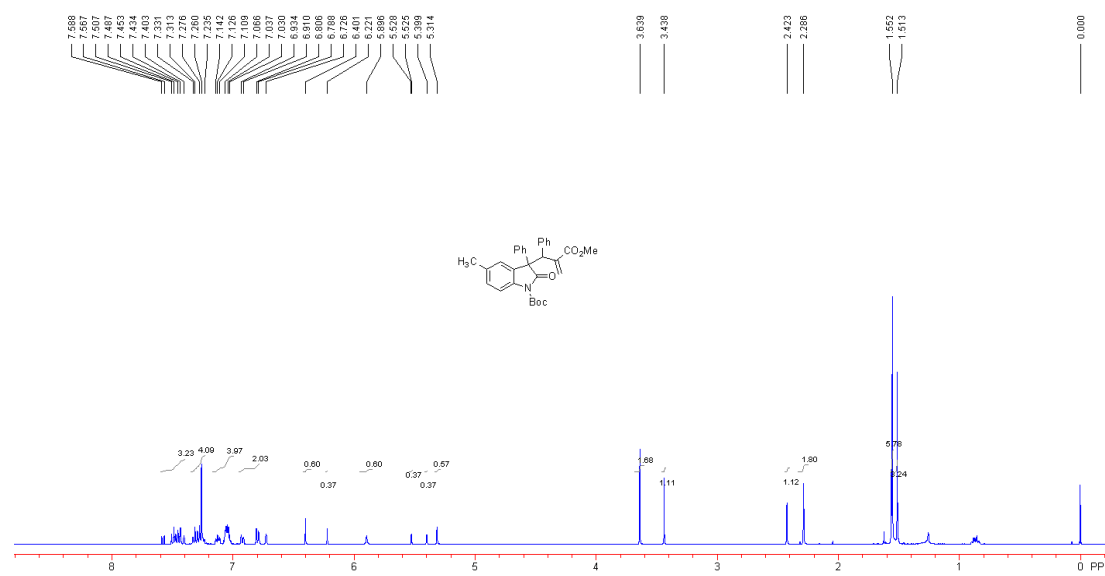

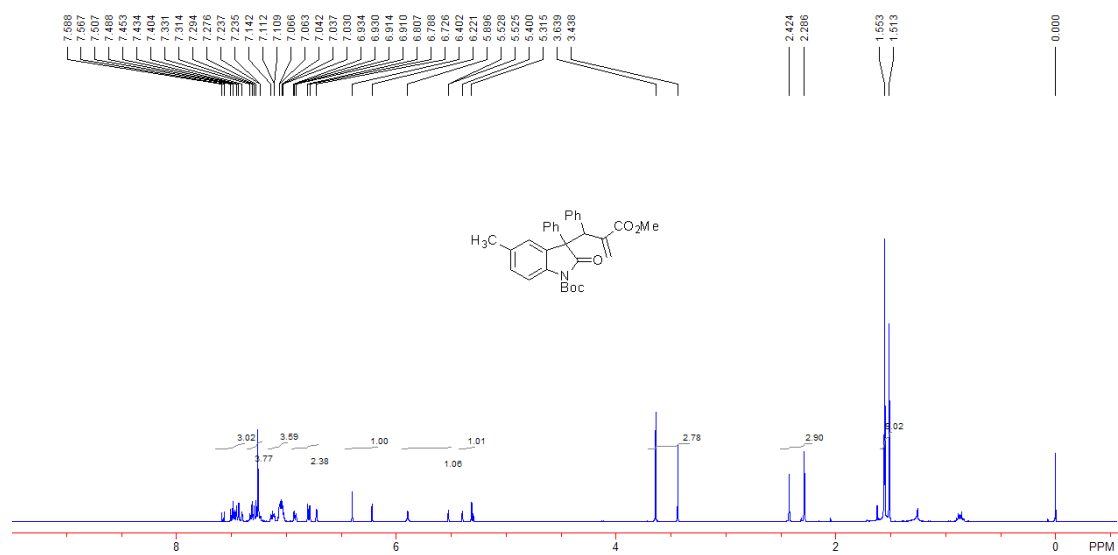

N2000 数据工作站 1

实验时间: 2012-04-04, 11:46:43  
请图文件: I:\SIOC液相\MBH AAA\wd-9-50ad1.0955254re-race.org  
实验者:  
报告时间: 2012-04-05, 20:30:25  
积分方法: 面积归一法

使用仪器类型: 气相色谱  
柱温: 程序升温  
检测器: FID  
进样器: 分流

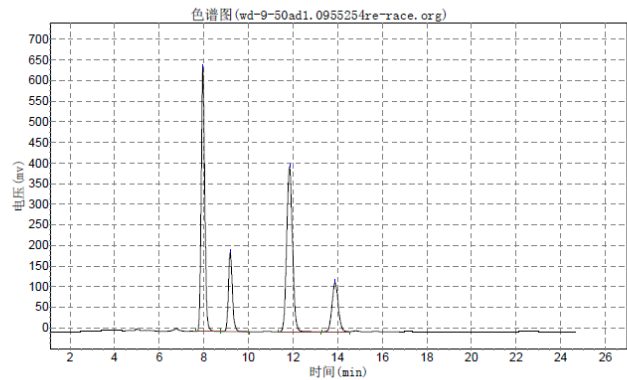

| 分析结果表 |    |        |             |              |          |
|-------|----|--------|-------------|--------------|----------|
| 峰号    | 峰名 | 保留时间   | 峰高          | 峰面积          | 含量       |
| 1     |    | 7.957  | 640804.813  | 7119955.500  | 37.3500  |
| 2     |    | 9.182  | 190706.297  | 2364060.500  | 12.4014  |
| 3     |    | 11.848 | 399607.531  | 7257721.000  | 38.0727  |
| 4     |    | 13.882 | 118504.047  | 2321050.000  | 12.1758  |
| 总计    |    |        | 1349622.688 | 19062787.000 | 100.0000 |

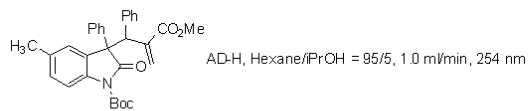

实验时间: 2012-04-04, 12:07:38  
谱图文件: I:\SIOC液相\MBH AAA\wd-9-51ad1.0955254re-opt.org

实验者:  
报告时间: 2012-04-05, 20:35:46  
积分方法: 面积归一法

使用仪器类型: 气相色谱  
柱温: 程序升温

检测器: FID

进样器: 分流

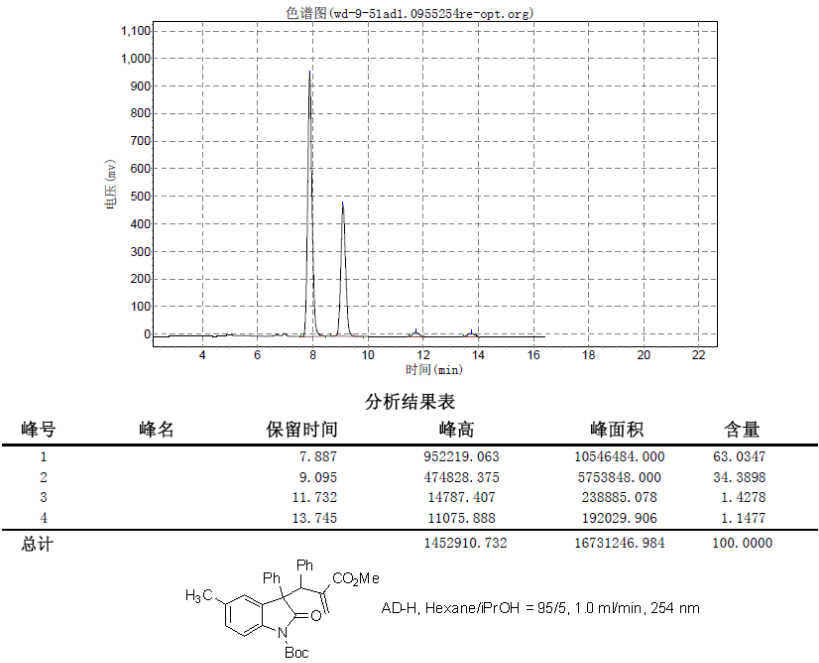

Enantiomeric excess was determined by HPLC with a Chiralcel AD-H column, Hexane/*i*PrOH = 95/5, 1.0 mL/min, 254 nm, for *anti* product  $t_{major} = 7.887$  min,  $t_{minor} = 11.732$  min; for *syn* product  $t_{major} = 9.095$  min,  $t_{minor} = 13.745$  min

## 6. A plausible reaction mechanism

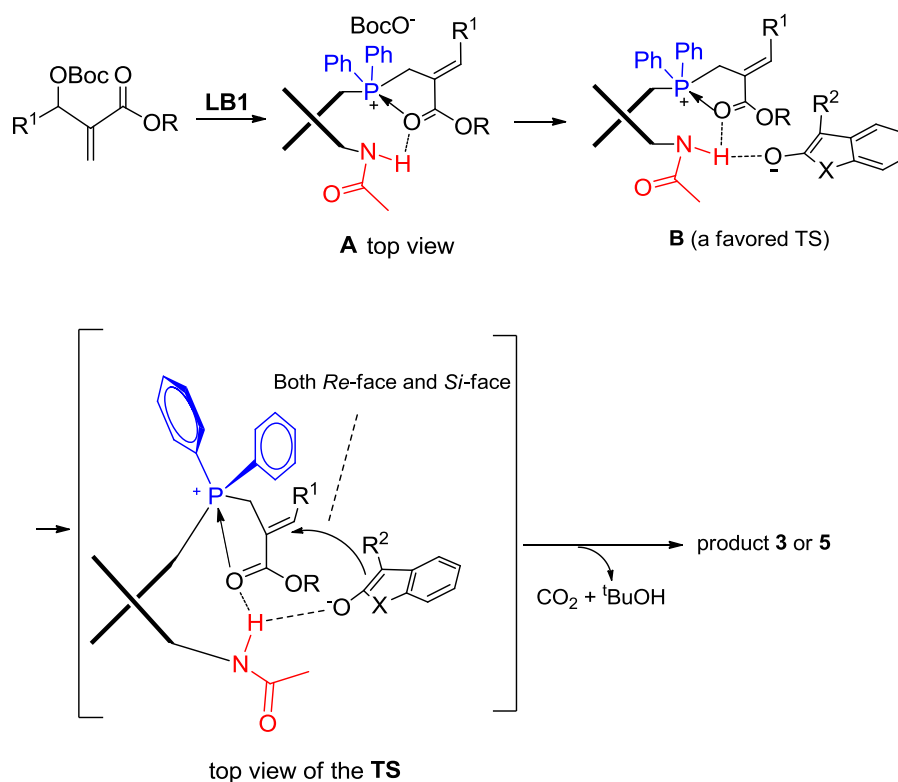

**Scheme SI-1**

A plausible mechanism for this asymmetric reaction is outlined in Scheme SI-1. As proposed by Krische,<sup>7</sup> the treatment of MBH carbonate with **LB1** produces an electrophile-nucleophile ion pair **A** stabilized by an intramolecular H-bonding, which reacts with the 3-substituted benzofuran or oxindole anion generated from  $BocO^-$  and 3-substituted benzofuran or oxindole to give intermediate **B**. Intermediate **B** is favored through intermolecular hydrogen-bonding, providing the addition product **3** or **5** from both *Re*-face or *Si*-face attacking via the transition state **TS** shown in Scheme SI-1.

## 7. References

1. Y.-Q. Jiang, Y.-L. Shi, M. Shi, *J. Am. Chem. Soc.* **2008**, *130*, 7202.
2. J. Feng, X. Lu, A. Kong, X. Han, *Tetrahedron* **2007**, *63*, 6035.
3. A. Padwa, D. Dehm, T. Oine, G. A. Lee, *J. Am. Chem. Soc.* **1975**, *97*, 1837.
4. a) H. Yamashima, T. Suzuki, H. Takano, Y. Simura and M. Sodeoka, *J. Am. Chem. Soc.* **2005**, *127*, 10164; b) T. Ishimaru, N. Shibata, J. Nagai, S. Nakamura, T. Toru, S. Kanemasa, *J. Am. Chem. Soc.* **2006**, *128*, 16488.
5. K. Jiang, J. Peng, H.-L. Cui, Y.-C. Chen, *Chem. Commun.* **2009**, 3955.
6. C. Liu, B.-X. Tan, J.-L. Jin, Y.-Y. Zhang, N. Dong, X. Lin, J.-P. Cheng, *J. Org. Chem.* **2011**, *76*, 5838.
7. (a) C.-W. Cho, M. J. Krische, *Angew. Chem. Int. Ed.*, **2004**, *43*, 6689 and references therein; (b) C.-W. Cho, J.-R. Kong, M. J. Krische, *Org. Lett.*, **2004**, *6*, 1337; (c) L.-C. Wang, A. L. Luis, K. Agapiou, H.-Y. Jang, M. J. Krische, *J. Am. Chem. Soc.*, **2002**, *124*, 2402; (d) P. K. Koech, M. J. Krische, *J. Am. Chem. Soc.*, **2004**, *126*, 5350.
